# Supplementary material for: Suzuki–Miyaura coupling of phosphinoyl-α-allenic alcohols with arylboronic acids catalyzed by a palladium complex “on water”: an efficient method to generate phosphinoyl 1,3-butadienes and derivatives
Source: Royal Society of Chemistry journal article supplement (doi:10.1039/c4ra12251h), 2014-01-01

Supporting Materials for:

# **Suzuki-Miyaura Coupling of Phosphinoyl- $\alpha$ -Allenic Alcohols with Arylboronic Acids Catalyzed by Palladium Complex “On Water”: An Efficient Method to Generate Phosphinoyl 1,3-Buta-dienes and Derivatives**

Teng Liu <sup>a</sup>, Jie Dong <sup>a,§</sup>, Shu-Jun Cao <sup>a,§</sup>, Li-Cheng Guo <sup>a,§</sup> AND Lei Wu <sup>a,b\*</sup>

<sup>a</sup> Jiangsu Key Laboratory of Pesticide Science and Department of Chemistry, College of Sciences, Nanjing Agricultural University, Nanjing 210095, P. R. China.

Tel/Fax: +86-25-84396716; E-mail: [rickywu@njau.edu.cn](mailto:rickywu@njau.edu.cn)

<sup>b</sup> CAS Key Laboratory of Molecular Recognition and Function, Institute of Chemistry, Chinese Academy of Sciences, Beijing 100190, P. R. China. E-mail: [rickywu@iccas.ac.cn](mailto:rickywu@iccas.ac.cn)

## **List of Contents:**

|                                                                                                                                      |         |
|--------------------------------------------------------------------------------------------------------------------------------------|---------|
| 1. General Information.....                                                                                                          | S2      |
| 2. General Procedures for Substrates Preparation.....                                                                                | S2      |
| 3. General Procedures for the Palladium-Catalyzed Couplings of Phosphinoyl- $\alpha$ -Allenic Alcohols with Arylboronic Acids.....   | S3      |
| 4. Characterizations of Substrates and Coupling Products ( <sup>1</sup> HNMR, <sup>13</sup> CNMR, <sup>31</sup> PNMR and HR-MS)..... | S3-S11  |
| 5. Selected Spectra of Substrates and Products.....                                                                                  | S12-S60 |

## 1. General Information:

Solvents and reagents were reagent grade and used without purification unless otherwise noted. Anhydrous solvents were obtained as follow: THF and dioxane by distillation from sodium and benzophenone; All reactions were carried out under nitrogen or argon unless otherwise specified. All <sup>1</sup>H-NMR (400 MHz) spectra were recorded on a Bruker-DMX 400 using CDCl<sub>3</sub> solution in the presence of tetramethylsilane (TMS) as an internal standard and are reported in ppm (δ). Coupling constants are reported in Hertz (Hz). Spectral splitting patterns are designated as s, singlet; d, doublet; t, triplet; q, quartet; p, pentet; m, multiplet; and br, broad. High and Low resolution fast atom bombardment (FAB) measurements were made with a JEOL JMS-AX505HA mass spectrometer.

## 2. General Procedures for Substrates Preparation:

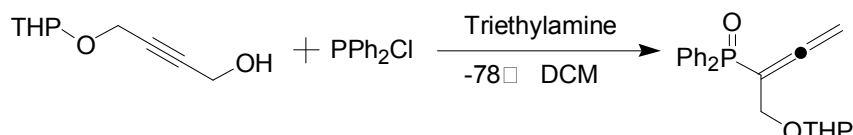

To a stirred and cooled (-78 °C) solution of the acetylenic alcohol (40 mmol) in CH<sub>2</sub>Cl<sub>2</sub> (50 mL) under nitrogen was added sequentially triethylamine (11.17 ml, 80 mmol) and diphenylphosphine chloride (40 mmol) in CH<sub>2</sub>Cl<sub>2</sub> (50 mL). The stirring was maintained 1 h at -78 °C and then at room temperature for overnight. The solution was quenched with ice water and extracted with CH<sub>2</sub>Cl<sub>2</sub>, and the organic layer was dried with Na<sub>2</sub>SO<sub>4</sub>. Concentration *in vacuo* gave the crude product that was subjected to flash chromatography on silica gel eluting with ethyl acetate/petroleum ether (1:3).

[When R<sub>2</sub>, R<sub>3</sub> ≠ H]:

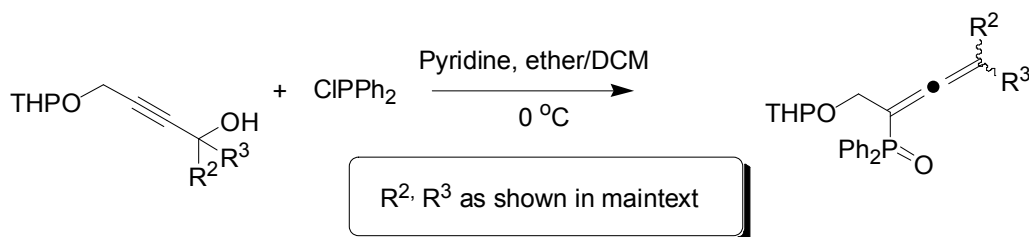

To a stirred and cooled (0 °C) solution of the acetylenic alcohol (40 mmol) in anhydrous ether (50 mL) and pyridine (3.88 mL, 48 mmol) under nitrogen was added dropwisely diphenylphosphine chloride (40 mmol) in CH<sub>2</sub>Cl<sub>2</sub> (50 mL). The stirring was maintained 1 h at 0 °C and then at room temperature overnight. The solution was quenched with ice water and extracted with CH<sub>2</sub>Cl<sub>2</sub>, and the organic layer was dried with Na<sub>2</sub>SO<sub>4</sub>. Concentration *in vacuo* gave the crude product that was subjected to flash chromatography on silica gel eluting with ether.

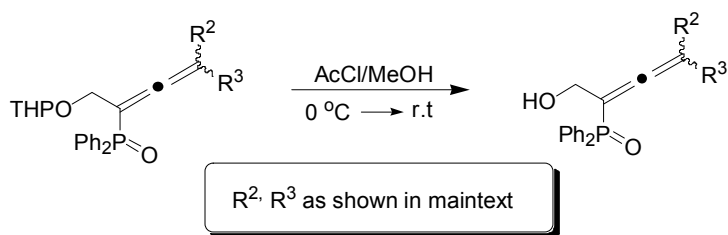

The cooled solution of THP-protected phosphinoyl-allenic alcohol (32 mmol) in methanol (150 mL) was added acetyl chloride (0.32 mmol) dropwisely. The stirring was maintained 5 min at 0 °C and at room temperature for 1h. The reaction was quenched with ice water and extracted with ethyl acetate, and the organic layer was collected and dried with Na<sub>2</sub>SO<sub>4</sub>. Concentration *in vacuo* gave the crude product that was subjected to flash chromatography on silica gel eluting with ethyl acetate/petroleum ether (3:1).

### 3. General Procedures for the Palladium-Catalyzed Couplings of Phosphinoyl- $\alpha$ -Allenic Alcohols with Arylboronic Acids

To a 10 mL flask equipped with condenser under nitrogen was added phosphinoyl- $\alpha$ -allenic alcohol (1 mmol), arylboronic acid (2 mmol), Pd(PPh<sub>3</sub>)<sub>2</sub>Cl<sub>2</sub> (5 mol%), and 10 mL degassed water. The reaction mixture was then heated to reflux for several hours until the complete consuming of starting materials monitored by TLC. After being cooling down, the reaction was extracted with ethyl acetate (5 mL $\times$ 2). The crude product was purified on flash chromatography, with ethyl acetate/ petroleum ether (1:1) as eluents to afford product.

### 4. Characterizations of Substrates and Coupling Products (<sup>1</sup>H-NMR, <sup>13</sup>C-NMR, <sup>31</sup>P-NMR, HR-MS)

#### 4.1 Substrates:

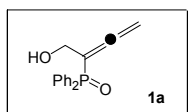

White solids, m.p.: 113.5-115.1°C.

<sup>1</sup>H-NMR:  $\delta$  3.482 (br. s, 1H), 4.468-4.507 (m, 2H), 4.837-4.874 (m, 2H), 7.484-7.528(m, 4H), 7.568-7.608 (m, 2H), 7.744-7.795 (m, 4H).

<sup>13</sup>C-NMR:  $\delta$  61.47, 61.53, 96.64, 97.66, 128.44, 128.56, 130.93, 131.66, 131.76, 131.98, 132.27, 132.29, 210.72, 210.80.

<sup>31</sup>P-NMR:  $\delta$  30.724

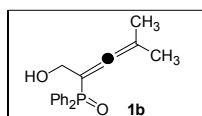

White solids, m.p.: 125.7-130.8°C.

<sup>1</sup>H-NMR:  $\delta$  1.491 (d, *J* = 4.0 Hz, 6H), 2.365 (br. s, 1H), 4.405 (d, *J* = 12.0 Hz, 2H), 7.438-7.482 (m, 4H), 7.516-7.566 (m, 2H), 7.678-7.729 (m, 4H).

<sup>13</sup>C-NMR: δ 19.15, 19.20, 61.73, 61.81, 95.42, 96.45, 99.28, 99.41, 128.33, 128.45, 131.48, 131.58, 131.69, 131.96, 131.98, 132.73, 206.73, 206.80.

<sup>31</sup>P-NMR: δ 32.889.

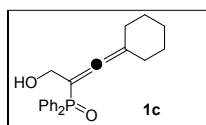

Pale yellow solids, m.p.: 144.4-147.4 °C.

<sup>1</sup>H-NMR: δ 0.925-1.024 (m, 2H), 1.247-1.513 (m, 4H), 1.862-2.207 (m, 4H), 4.395 (d, *J* = 11.6 Hz, 2H), 7.426-7.546 (m, 6H), 7.673-7.724 (m, 4H).

<sup>13</sup>C-NMR: δ 25.42, 26.36, 26.39, 29.98, 30.03, 61.95, 62.03, 95.28, 96.31, 105.42, 105.55, 128.35, 128.47, 131.63, 131.72, 131.94, 131.96, 132.74, 203.49, 203.56.

<sup>31</sup>P-NMR: δ 33.263.

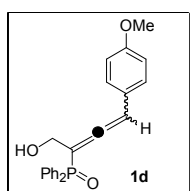

White solids, m.p.: 135.5-138.1 °C.

<sup>1</sup>H-NMR: δ 3.812 (s, 3H), 4.573-4.607 (m, 2H), 6.228-6.264 (m, 1H), 6.799 (d, *J* = 8.8 Hz, 2H), 7.009 (d, *J* = 8.8 Hz, 2H), 7.353-7.398 (m, 2H), 7.451-7.503 (m, 3H), 7.543-7.588 (m, 1H), 7.719-7.815 (m, 4H).

<sup>13</sup>C-NMR: δ 55.37, 62.13, 62.19, 96.98, 97.12, 101.54, 102.55, 114.26, 123.60, 123.66, 128.33, 128.35, 128.38, 128.47, 128.50, 128.60, 131.39, 131.47, 131.57, 131.62, 131.72, 132.09, 132.18, 132.20, 132.28, 132.31, 132.38, 132.43, 159.48, 209.06, 209.13.

<sup>31</sup>P-NMR: δ 30.499.

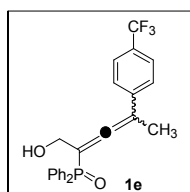

White solids, m.p.: 146.0-146.4 °C.

<sup>1</sup>H-NMR: δ 1.907 (d, *J* = 5.6 Hz, 3H), 3.015 (br. s, 1H), 4.530-4.623 (m, 2H), 7.198 (d, *J* = 8.4 Hz, 2H), 7.288-7.333 (m, 2H), 7.411-7.568 (m, 6H), 7.627-7.745 (m, 4H).

<sup>13</sup>C-NMR: δ 15.85, 15.91, 61.17, 61.24, 100.55, 101.54, 103.56, 103.70, 122.67, 125.22, 125.26, 125.29, 125.32, 125.38, 125.94, 125.96, 127.70, 127.83, 128.28, 128.40, 128.45, 128.57, 129.21, 129.54, 130.79, 130.91, 131.30, 131.35, 131.40, 131.42, 131.52, 131.84, 131.96, 132.16, 132.19, 132.23, 132.26, 138.63, 138.69, 209.05, 209.11.

<sup>31</sup>P-NMR: δ 31.659.

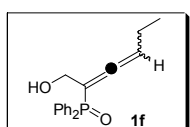

Pale yellow liquid, m.p.: 72.0-74.5 °C.



**<sup>1</sup>H-NMR:** δ 0.727 (t, *J* = 7.6 Hz, 3H), 1.807-1.895 (m, 2H), 3.617 (br. s, 1H), 4.377-4.479 (m, 2H), 5.221-5.281 (m, 1H), 7.417-7.559 (m, 6H), 7.670-7.764 (m, 4H).

**<sup>13</sup>C-NMR:** δ 13.15, 13.18, 21.06, 21.11, 61.41, 61.45, 61.49, 61.52, 95.95, 96.08, 98.13, 99.14, 128.26, 128.34, 128.38, 128.47, 131.21, 131.28, 131.51, 131.56, 131.62, 131.72, 131.97, 132.00, 132.02, 132.04, 132.07, 132.26, 132.32, 132.56, 132.61, 207.71, 207.78.

**<sup>31</sup>P-NMR:** δ 31.683.

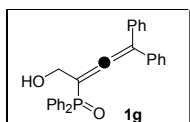

White solids, **m.p.:** 165.1-165.7 °C.

**<sup>1</sup>H-NMR:** δ 3.462 (br. s, 1H), 4.640 (d, *J* = 11.2 Hz, 2H), 6.959-6.990 (m, 4H), 7.276-7.371 (m, 10H), 7.460-7.519 (m, 2H), 7.619-7.670 (m, 4H).

**<sup>13</sup>C-NMR (d<sup>6</sup>-DMSO):** δ 58.53, 58.65, 103.03, 103.98, 112.99, 113.12, 127.95, 127.97, 128.10, 128.49, 128.61, 128.67, 130.96, 131.06, 131.79, 132.09, 132.12, 132.82, 134.69, 134.75, 208.83, 208.87.

**<sup>31</sup>P-NMR:** δ 31.180.

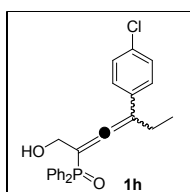

White solids, **m.p.:** 122.0-122.4 °C.

**<sup>1</sup>H-NMR:** δ 0.870 (t, *J* = 7.2 Hz, 3H), 2.064-2.286 (m, 2H), 4.531-4.625 (m, 2H), 7.071 (d, *J* = 8.8 Hz, 2H), 7.251 (d, *J* = 8.8 Hz, 2H), 7.310-7.355 (m, 1H), 7.366-7.485 (m, 3H), 7.641-7.745 (m, 6H).

**<sup>13</sup>C-NMR:** δ 12.31, 23.04, 23.09, 61.57, 61.63, 102.67, 110.55, 110.69, 127.42, 127.44, 127.94, 128.06, 128.35, 128.48, 128.72, 130.86, 130.92, 130.95, 131.01, 131.34, 131.44, 131.53, 131.57, 131.67, 131.92, 131.94, 132.01, 132.19, 133.08, 133.15, 133.42, 208.71, 208.81.

**<sup>31</sup>P-NMR:** δ 31.793.

## 4.2 Coupling products:

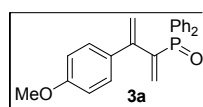

Viscous liquid.

**<sup>1</sup>H-NMR:** δ 3.74 (s, 3H), 5.31 (s, 1H), 5.55 (s, 1H), 5.87 (d, *J* = 19.6 Hz, 1H), 6.03 (d, *J* = 40 Hz, 1H), 6.76 (d, *J* = 8.8 Hz, 2H), 7.16 (d, *J* = 8.8 Hz, 2H), 7.39-7.42 (m, 4H), 7.46-7.49 (m, 2H), 7.73-7.78 (m, 4H).

**<sup>13</sup>C-NMR:** δ 55.28, 113.54, 118.09, 118.14, 128.37, 128.50, 129.10, 131.20, 131.80, 131.86, 131.90, 132.23, 132.69, 132.75, 133.91, 134.01, 143.86, 144.77, 145.30, 145.40, 159.25.

**<sup>31</sup>P-NMR:** δ 29.200

**HR-MS (ESI):** C<sub>23</sub>H<sub>21</sub>NaO<sub>2</sub>P (calcd.: 383.1177), found: 383.1171 ([M+Na]<sup>+</sup>)

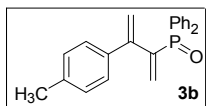

Viscous pale yellow liquid

**<sup>1</sup>H-NMR:** 2.314 (s, 3H), 5.349 (s, 1H), 5.627 (d, *J* = 1.6 Hz, 1H), 5.837 (d, *J* = 20.0 Hz, 1H), 6.001 (d, *J* = 40.4 Hz, 1H), 7.054 (d, *J* = 8.0 Hz, 2H), 7.125 (d, *J* = 8.0 Hz, 2H), 7.414-7.529 (m, 6H), 7.736-7.786 (m, 4H).

**<sup>13</sup>C-NMR:** 21.12, 118.95, 119.00, 127.84, 128.33, 128.45, 128.82, 131.22, 131.77, 131.81, 131.86, 132.25, 133.88, 133.98, 137.44, 137.47, 137.53, 143.52, 144.43, 145.51, 145.60.

**<sup>31</sup>P-NMR:** δ 30.171

**HR-MS (ESI):** C<sub>23</sub>H<sub>21</sub>NaOP (calcd.: 367.1228), found:367.1222 ([M+Na]<sup>+</sup>)

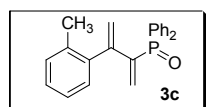

Viscous pale yellow liquid

**<sup>1</sup>H-NMR:** δ 2.227 (s, 3H), 5.256 (s, 1H), 5.461-5.621 (m, 2H), 6.076 (s, 1H), 7.098-7.239 (m, 5H), 7.488-7.588 (m, 6H), 7.802-7.849 (m, 4H).

**<sup>13</sup>C-NMR:** δ 19.73, 122.44, 122.48, 125.74, 127.64, 128.54, 128.66, 129.53, 130.04, 131.55, 131.73, 131.82, 131.97, 132.00, 132.58, 133.04, 133.15, 135.87, 140.42, 140.50, 142.17, 143.08, 144.61, 144.72.

**<sup>31</sup>P-NMR:** δ 33.554

**HR-MS (ESI):** C<sub>23</sub>H<sub>21</sub>NaOP (calcd.: 367.1228), found:367.1222 ([M+Na]<sup>+</sup>)

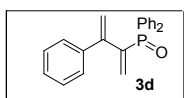

Viscous pale yellow liquid

**<sup>1</sup>H-NMR:** δ 5.378 (s, 1H), 5.681 (d, *J* = 1.6Hz, 1H), 5.852 (d, *J* = 19.6 Hz, 1H), 5.994 (d, *J* = 40.0 Hz, 1H), 7.236-7.261 (m, 4H), 7.419-7.534 (m, 6H), 7.739-7.790 (m, 4H).

**<sup>31</sup>P-NMR:** δ 30.101

**HR-MS (ESI):** C<sub>22</sub>H<sub>19</sub>NaOP (calcd.: 353.1071), found: 353.1066 ([M+Na]<sup>+</sup>)

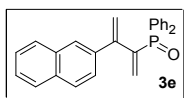

Viscous pale yellow liquid.

**<sup>1</sup>H-NMR:** δ 5.404 (d, *J* = 16.8 Hz, 2H), 5.521 (d, *J* = 41.6 Hz, 1H), 6.263 (s, 1H), 7.300-7.320 (m, 1H), 7.397-7.455 (m, 3H), 7.469-7.581 (m, 6H), 7.773-7.870 (m, 7H).

**<sup>13</sup>C-NMR:** δ 123.74, 123.78, 123.80, 123.81, 125.29, 125.31, 125.89, 126.01, 126.11, 126.80, 127.97, 128.17, 128.54, 128.56, 128.66, 128.68, 131.82, 131.91, 132.02, 133.57, 133.61, 133.71, 133.79, 138.72, 138.77, 138.79, 143.60, 143.68.

**<sup>31</sup>P-NMR:** δ 31.662.

**HR-MS (ESI):** C<sub>26</sub>H<sub>21</sub>NaOP (calcd.: 403.1228), found:403.1222 ([M+Na]<sup>+</sup>)

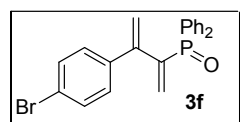

Viscous pale yellow liquid

**<sup>1</sup>H-NMR:** δ 5.414 (s, 1H), 5.690 (d, *J* = 1.6 Hz, 1H), 5.901 (d, *J* = 19.6 Hz, 1H), 6.030 (d, *J* = 40 Hz, 1H), 7.127 (d, *J* = 8.4 Hz, 2H), 7.401 (d, *J* = 8.4 Hz, 2H), 7.464-7.589 (m, 6H), 7.756-7.807 (m, 4H).

**<sup>31</sup>P-NMR:** δ 29.518

**HR-MS (ESI):** C<sub>22</sub>H<sub>18</sub>BrNaOP (calcd.: 431.0176), found:431.0171 ([M+Na]<sup>+</sup>)

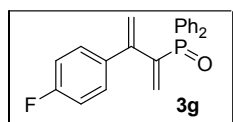

Viscous pale yellow liquid

**<sup>1</sup>H-NMR:** δ 5.341 (s, 1H), 5.616 (d, *J* = 2.0 Hz, 1H), 5.861 (d, *J* = 19.6 Hz, 1H), 5.997 (d, *J* = 39.6 Hz, 1H), 6.916 (t, *J* = 8.8 Hz, 2H), 6.894-7.191 (m, 2H), 7.418-7.538 (m, 6H), 7.715-7.766 (m, 4H).

**<sup>13</sup>C-NMR:** δ 114.96, 115.17, 119.42, 119.47, 128.46, 128.53, 128.58, 128.65, 129.57, 129.65, 130.90, 131.80, 131.89, 131.93, 132.01, 132.04, 132.09, 132.15, 134.06, 134.15, 136.20, 136.24, 136.25, 136.29, 143.70, 144.62, 144.93, 145.03, 161.17, 163.62.

**<sup>31</sup>P-NMR:** δ 29.627

**HR-MS (ESI):** C<sub>22</sub>H<sub>18</sub>FNaOP (calcd.: 371.0977), found:371.0972 ([M+Na]<sup>+</sup>)

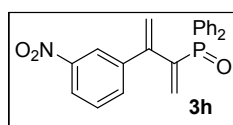

Viscous pale yellow liquid

**<sup>1</sup>H-NMR:** δ 5.489 (s, 1H), 5.743 (d, *J* = 2.0 Hz), 5.909 (d, *J* = 21.6 Hz, 1H), 6.029 (d, *J* = 39.2 Hz, 1H), 7.422-7.524 (m, 8H), 7.716-7.767 (m, 4H), 7.971-8.085 (m, 2H).

**<sup>31</sup>P-NMR:** δ 28.681

**HR-MS (ESI):** C<sub>22</sub>H<sub>18</sub>NNaO<sub>3</sub>P (calcd.: 398.0922), found:398.0917([M+Na]<sup>+</sup>)

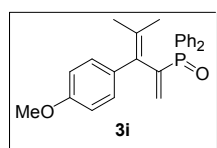

Viscous pale yellow liquid

**<sup>1</sup>H-NMR:** δ 1.305 (s, 3H), 1.321 (s, 3H), 3.494 (d, *J* = 8.4 Hz, 2H), 3.762 (s, 3H), 6.733 (d, *J* = 8.8 Hz, 2H), 7.036 (d, *J* = 8.8 Hz, 2H), 7.397-7.489 (m, 6H), 7.651-7.702 (m, 4H).

**<sup>13</sup>C-NMR:** δ 18.84, 18.90, 33.20, 33.29, 55.12, 96.53, 97.55, 99.12, 99.26, 113.43, 128.05, 128.17, 128.42, 128.54, 129.96, 130.95, 131.01, 131.42, 131.51, 131.77, 131.94, 132.04, 132.80, 157.93, 208.55, 208.62.

**<sup>31</sup>P-NMR:** δ 31.546

**HR-MS (ESI):** C<sub>25</sub>H<sub>25</sub>NaO<sub>2</sub>P (calcd.: 411.1490), found:411.1484 ([M+Na]<sup>+</sup>)

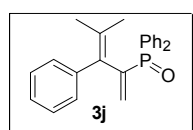

Pale yellow solids, **m.p.:** 85.6-86.8 °C.

**<sup>1</sup>H-NMR:** δ 1.291 (s, 3H), 1.307 (s, 3H), 3.548 (d, *J* = 8.4 Hz, 2H), 7.113-7.217 (m, 5H), 7.395-7.510 (m, 6H), 7.662-7.712 (m, 4H).

**<sup>13</sup>C-NMR:** δ 18.85, 18.90, 34.09, 34.18, 96.48, 97.51, 99.25, 99.39, 126.16, 128.09, 128.13, 128.25, 129.12, 131.57, 131.59, 131.66, 131.92, 132.95, 139.06, 139.12, 208.73, 208.80.

**<sup>31</sup>P-NMR:** δ 31.317

**HR-MS (ESI):** C<sub>24</sub>H<sub>23</sub>NaOP (calcd.: 381.1384), found:381.1379 ([M+Na]<sup>+</sup>)

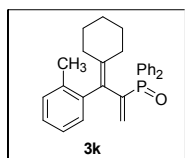

Pale yellow solids, **m.p.:** 117.7-120.0 °C.

**<sup>1</sup>H-NMR:** δ 0.940-1.261 (m, 6H), 1.535-1.614 (m, 2H), 1.688-1.757 (m, 2H), 2.239 (s, 3H), 3.538 (d, *J* = 6.0 Hz, 2H), 7.066 (s, 4H), 7.420-7.528 (m, 6H), 7.712-7.762 (m, 4H).

**<sup>13</sup>C-NMR:** δ 19.26, 25.41, 26.34, 26.37, 29.77, 29.82, 31.97, 32.06, 95.85, 96.89, 105.70, 105.81, 125.80, 126.47, 128.19, 128.31, 129.93, 130.05, 131.60, 131.62, 131.72, 132.01, 133.04, 136.57, 137.35, 137.43, 204.88, 204.96

**<sup>31</sup>P-NMR:** δ 30.230.

**HR-MS (ESI):** C<sub>28</sub>H<sub>29</sub>NaOP (calcd.: 435.1854), found:435.1848 ([M+Na]<sup>+</sup>)

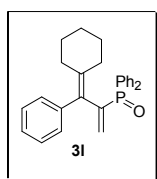

Viscous yellow liquid

**<sup>1</sup>H-NMR:** δ 0.979-1.262 (m, 6H), 1.612-1.686 (m, 2H), 1.746-1.818 (m, 2H), 3.555 (d, *J* = 7.6 Hz, 2H), 7.118-7.213 (m, 5H), 7.383-7.487 (m, 6H), 7.691-7.741 (m, 4H).

**<sup>13</sup>C-NMR:** δ 25.35, 26.24, 26.27, 29.71, 29.76, 34.16, 34.25, 96.61, 97.65, 105.60, 105.74, 126.10, 128.04, 128.14, 128.26, 129.17, 131.54, 131.58, 131.67, 131.85, 132.88, 139.01, 139.09, 205.25, 205.33.

**<sup>31</sup>P-NMR:** δ 30.829

**HR-MS (ESI):** C<sub>27</sub>H<sub>27</sub>NaOP (calcd.: 421.1697), found:421.1692([M+Na]<sup>+</sup>)

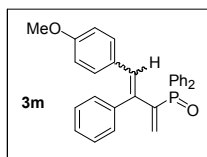

Viscous pale yellow liquid

**<sup>1</sup>H-NMR:** δ 3.698 (s, 3H), 3.810 (s, 1H), 5.505 (d, *J* = 20 Hz, 1H), 5.702 (d, *J* = 41.6 Hz, 1H), 6.575 (d, *J* = 8.8 Hz, 2H), 6.694 (d, *J* = 8.8 Hz, 2H), 7.160-7.218 (m, 4H), 7.337-7.566 (m, 7H), 7.828-7.874 (m, 4H).

**<sup>31</sup>P-NMR:** δ 32.243, 29.661

**HR-MS (ESI):** C<sub>29</sub>H<sub>25</sub>NaO<sub>2</sub>P (calcd.: 459.1490), found:459.1484 ([M+Na]<sup>+</sup>)

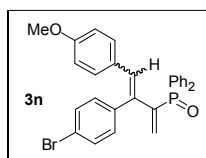

Viscous pale yellow liquid

**$^1\text{H-NMR}$ :**  $\delta$  3.592-3.744 (m, 2H), 3.779 (s, 3H), 5.989-6.030 (m, 1H), 6.753 (d,  $J$  = 8.4 Hz, 2H), 6.855 (d,  $J$  = 8.4 Hz, 2H), 7.041 (d,  $J$  = 8.4 Hz, 2H), 7.262-7.325 (m, 4H), 7.371-7.412 (m, 2H), 7.469-7.518 (m, 2H), 7.639-7.736 (m, 4H).

**$^{13}\text{C-NMR}$ :**  $\delta$  34.08, 34.16, 55.34, 97.65, 97.78, 102.23, 103.22, 114.18, 120.42, 123.98, 124.05, 126.78, 127.97, 127.99, 128.24, 128.33, 128.36, 128.46, 128.60, 130.99, 131.35, 131.48, 131.52, 131.58, 131.62, 131.67, 131.76, 131.82, 131.85, 131.87, 131.92, 131.94, 132.02, 132.05, 132.30, 137.52, 137.58, 159.33, 210.55, 210.61.

**$^{31}\text{P-NMR}$ :**  $\delta$  29.5176, 29.698.

**HR-MS (ESI):**  $\text{C}_{29}\text{H}_{24}\text{BrNaO}_2\text{P}$  (calcd.: 537.0595), found:537.0590 ( $[\text{M}+\text{Na}]^+$ )

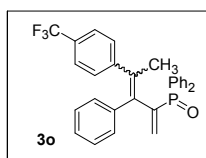

Viscous yellow liquid

**$^1\text{H-NMR}$ :**  $\delta$  1.701 (d,  $J$  = 6.0 Hz, 3H), 3.714 (d,  $J$  = 8.8 Hz, 2H), 6.944 (d,  $J$  = 8.4 Hz, 2H), 7.118-7.211 (m, 5H), 7.290-7.335 (m, 2H), 7.378-7.521 (m, 6H), 7.619-7.708 (m, 4H).

**$^{13}\text{C-NMR}$ :**  $\delta$  14.67, 14.73, 33.15, 33.23, 100.67, 101.65, 103.05, 103.19, 124.04, 124.07, 124.57, 124.59, 125.53, 127.15, 127.27, 127.30, 127.40, 128.00, 129.89, 129.99, 130.27, 130.37, 130.40, 130.49, 130.87, 130.90, 130.93, 131.03, 137.30, 137.37, 138.16, 138.23, 209.57, 209.64.

**$^{31}\text{P-NMR}$ :**  $\delta$  30.482

**HR-MS (ESI):**  $\text{C}_{30}\text{H}_{24}\text{F}_3\text{NaOP}$  (calcd.: 511.1415), found:511.1409( $[\text{M}+\text{Na}]^+$ )

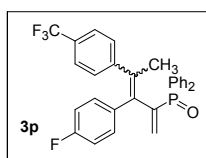

Viscous pale yellow liquid

**$^1\text{H-NMR}$ :**  $\delta$  1.767 (d,  $J$  = 6.0 Hz, 3H), 3.736 (d,  $J$  = 8.4 Hz, 2H), 6.913 (t,  $J$  = 8.8 Hz, 2H), 7.028 (d,  $J$  = 8.4 Hz, 2H), 7.145-7.180 (m, 2H), 7.336-7.381 (m, 2H), 7.428-7.572 (m, 6H), 7.657-7.747 (m, 4H).

**$^{13}\text{C-NMR}$ :**  $\delta$  15.84, 15.90, 33.67, 33.74, 101.86, 102.84, 104.30, 104.44, 115.12, 115.33, 122.85, 125.28, 125.31, 125.56, 125.72, 125.74, 128.34, 128.46, 128.49, 128.61, 129.17, 129.50, 130.64, 130.72, 131.01, 131.09, 131.40, 131.50, 131.53, 131.62, 132.06, 132.09, 132.13, 132.16, 134.21, 134.24, 134.27, 134.31, 139.15, 139.22, 160.53, 162.96, 210.58, 210.64.

**$^{31}\text{P-NMR}$ :**  $\delta$  30.310

**HR-MS (ESI):**  $\text{C}_{30}\text{H}_{23}\text{F}_4\text{NaOP}$  (calcd.: 529.1320), found:529.1315( $[\text{M}+\text{Na}]^+$ )

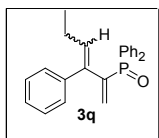

Viscous pale yellow liquid

**<sup>1</sup>H-NMR:**  $\delta$  0.656 (t,  $J$  = 7.6 Hz, 3H), 1.739-1.813 (m, 2H), 5.380 (d,  $J$  = 20.4 Hz, 1H), 5.523 (d,  $J$  = 42.0 Hz, 1H), 6.502 (t,  $J$  = 7.6 Hz, 1H), 7.096 (d,  $J$  = 6.8 Hz, 2H), 7.215-7.330 (m, 3H), 7.417-7.500 (m, 6H), 7.773-7.819 (m, 4H).

**<sup>13</sup>C-NMR:**  $\delta$  13.55, 23.25, 127.05, 128.28, 128.35, 128.47, 129.39, 131.70, 131.73, 131.76, 131.79, 131.86, 132.79, 137.30, 137.40, 138.42, 138.49, 138.58, 138.63, 143.98, 144.89.

**<sup>31</sup>P-NMR:**  $\delta$  32.172, 36.036

**HR-MS (ESI):** C<sub>24</sub>H<sub>23</sub>NaOP (calcd.: 381.1384), found:381.1379 ([M+Na]<sup>+</sup>)

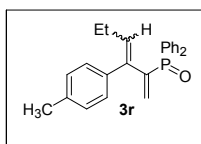

Viscous pale yellow liquid

**<sup>1</sup>H-NMR:**  $\delta$  0.653 (t,  $J$  = 7.6 Hz, 3H), 1.739-1.814 (m, 2H), 2.337 (s, 3H), 5.362 (d,  $J$  = 20.4 Hz, 3H), 5.537 (d,  $J$  = 42.4 Hz, 3H), 6.376-6.416 (m, 1H), 6.955 (d,  $J$  = 8.0 Hz, 2H), 7.112 (d,  $J$  = 8.0 Hz, 2H), 7.433-7.536 (m, 6H), 7.731-7.781 (m, 4H).

**<sup>13</sup>C-NMR:**  $\delta$  13.60, 21.26, 23.32, 29.71, 29.75, 30.25, 31.50, 128.39, 128.51, 128.56, 129.00, 129.38, 131.73, 131.76, 131.81, 131.90, 132.01, 132.80, 135.45, 135.53, 136.65, 137.21, 137.31, 138.60, 138.64, 144.05, 144.97.

**<sup>31</sup>P-NMR:**  $\delta$  32.112, 29.468.

**HR-MS (ESI):** C<sub>25</sub>H<sub>26</sub>OP (calcd.: 373.1721), found:373.1716 ([M+H]<sup>+</sup>)

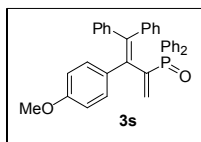

Viscous pale yellow liquid

**<sup>1</sup>H-NMR:**  $\delta$  3.697 (d,  $J$  = 7.6 Hz, 2H), 3.718 (s, 3H), 6.681-6.730 (m, 6H), 7.040 (d,  $J$  = 8.8 Hz, 2H), 7.176-7.334 (m, 6H), 7.409-7.449 (m, 6H), 7.613-7.661 (m, 4H).

**<sup>13</sup>C-NMR:**  $\delta$  33.88, 33.96, 55.45, 102.26, 103.24, 113.88, 127.89, 128.17, 128.20, 128.44, 128.56, 130.38, 130.46, 130.56, 131.31, 131.70, 131.80, 132.05, 132.08, 132.35, 135.16, 135.22, 158.52, 210.10, 210.16.

**<sup>31</sup>P-NMR:**  $\delta$  29.838

**HR-MS (ESI):** C<sub>35</sub>H<sub>29</sub>NaO<sub>2</sub>P (calcd.: 535.1803), found:535.1800 ([M+Na]<sup>+</sup>)

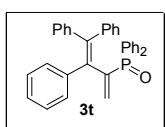

Pale yellow solids, **m.p.:** 95.2-97.6 °C.

**<sup>1</sup>H-NMR:**  $\delta$  3.737 (d,  $J$  = 7.6 Hz, 2H), 6.639-6.660 (m, 4H), 7.107-7.227 (m, 10H), 7.303-7.348 (m, 4H), 7.428-7.469 (m, 3H), 7.614-7.664 (m, 4H).

**<sup>13</sup>C-NMR:**  $\delta$  34.52, 34.60, 101.80, 102.79, 113.65, 113.79, 126.68, 127.78, 128.03, 128.05,

128.13, 128.31, 128.35, 128.38, 128.47, 128.54, 129.46, 131.07, 131.60, 131.70, 131.99, 132.01, 132.11, 134.96, 135.02, 138.18, 138.25, 210.03, 210.09.

<sup>31</sup>P-NMR: δ 29.803

**HR-MS (ESI):** C<sub>34</sub>H<sub>27</sub>NaOP (calcd.: 505.1697), found:505.1692 ([M+Na]<sup>+</sup>)

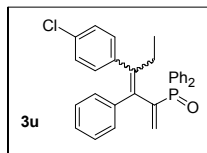

Viscous pale yellow liquid

<sup>1</sup>H-NMR: δ 0.689 (t, *J* = 7.6 Hz, 3H), 1.836-2.008 (m, 2H), 3.690 (d, *J* = 7.6 Hz, 2H), 6.767 (d, *J* = 8.0 Hz, 2H), 7.145-7.220 (m, 6H), 7.310-7.515 (m, 7H), 7.613-7.685 (m, 4H).

<sup>13</sup>C-NMR: δ 12.12, 12.14, 23.09, 23.15, 34.30, 34.38, 102.79, 103.78, 111.14, 111.28, 126.51, 127.07, 127.09, 128.09, 128.19, 128.23, 128.27, 128.32, 128.35, 128.41, 129.27, 130.98, 131.11, 131.36, 131.46, 131.53, 131.63, 131.82, 131.85, 131.88, 132.02, 132.14, 132.96, 132.97, 133.75, 133.81, 138.40, 138.47, 209.82, 209.89.

<sup>31</sup>P-NMR: δ 32.796.

**HR-MS (ESI):** C<sub>30</sub>H<sub>27</sub>ClOP (calcd.: 469.1488), found:469.1483 ([M+H]<sup>+</sup>)

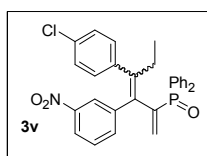

Viscous pale yellow liquid

<sup>1</sup>H-NMR: δ 0.713 (t, *J* = 7.2 Hz, 3H), 1.099-2.094 (m, 2H), 3.806 (d, *J* = 8.0 Hz, 2H), 6.830 (d, *J* = 7.6 Hz, 2H), 7.200 (d, *J* = 7.2 Hz, 2H), 7.404-7.477 (m, 5H), 7.614-7.697 (m, 7H), 8.004 (d, *J* = 13.2 Hz, 2H).

<sup>13</sup>C-NMR: δ 12.27, 23.19, 23.24, 29.75, 34.24, 34.32, 101.99, 102.99, 111.77, 111.90, 121.75, 124.15, 127.04, 127.06, 128.43, 128.52, 128.55, 128.64, 128.73, 129.28, 131.35, 131.45, 131.53, 131.62, 132.03, 132.06, 132.09, 132.19, 133.52, 135.63, 140.51, 140.57, 148.10, 209.58, 209.643.

<sup>31</sup>P-NMR: 30.030, 29.596.

**HR-MS (ESI):** C<sub>30</sub>H<sub>26</sub>ClNO<sub>3</sub>P (calcd.: 514.1339), found:514.1333 ([M+H]<sup>+</sup>)

## 5. Selected Spectra of Substrates and Products

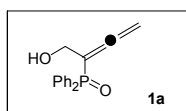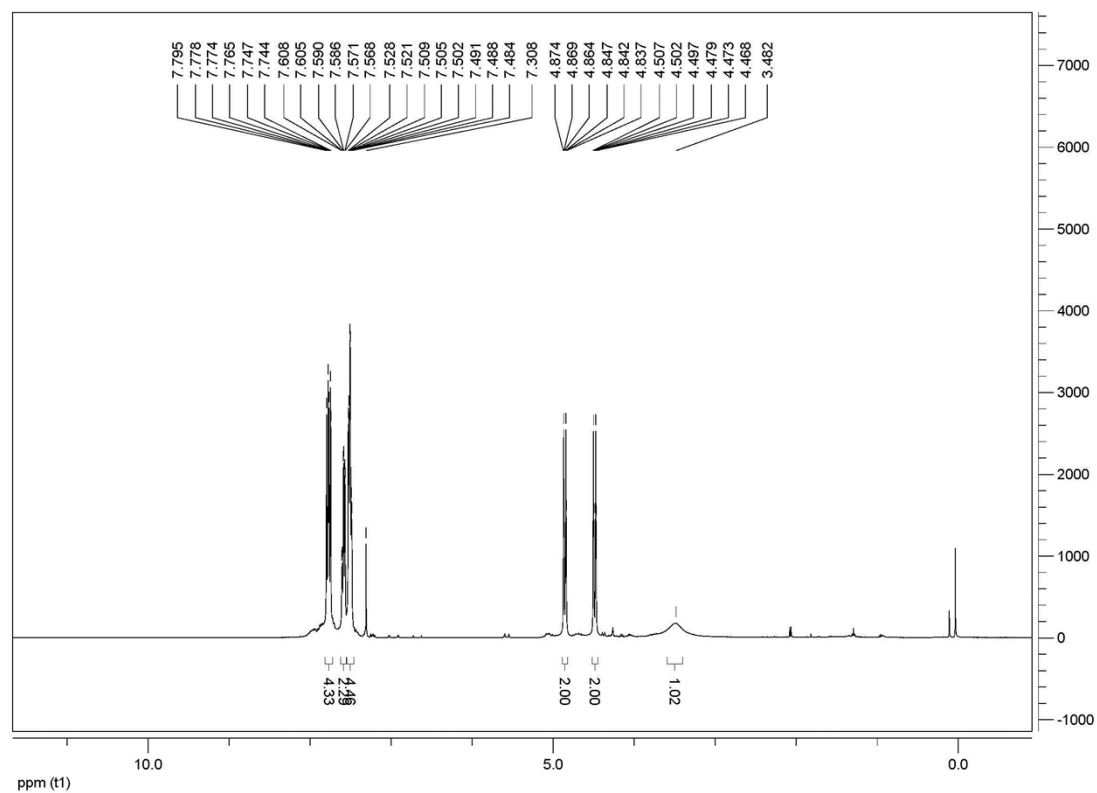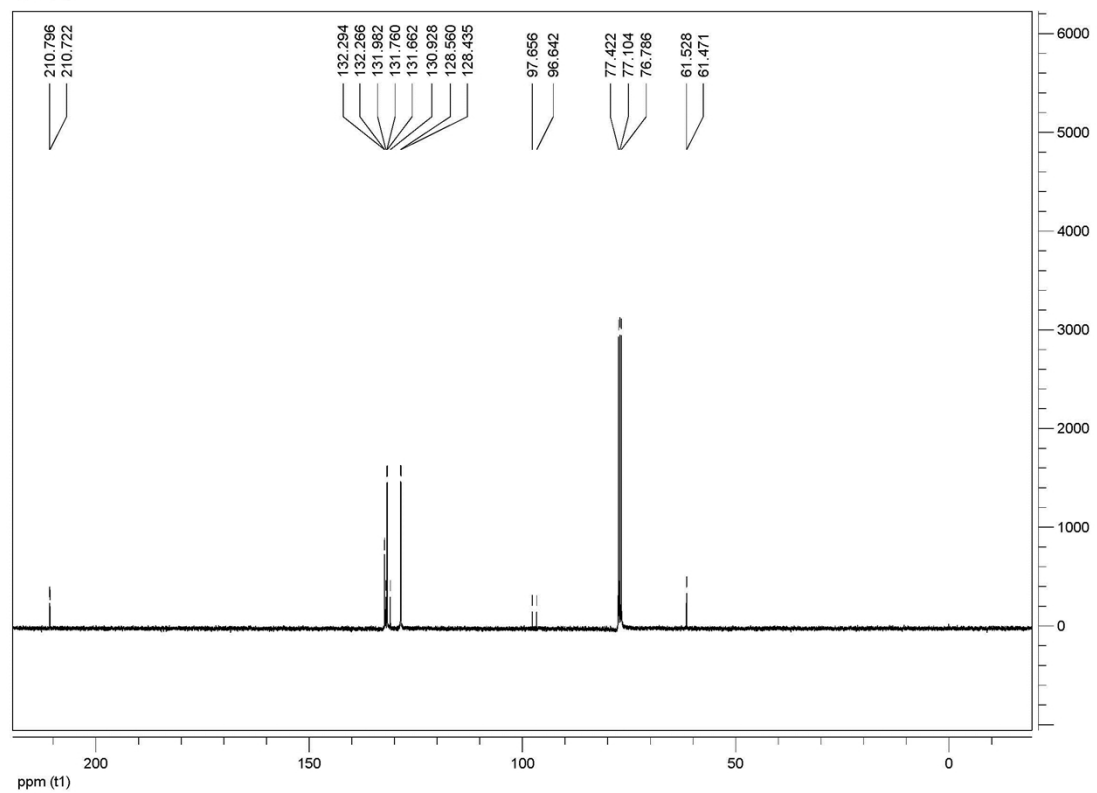



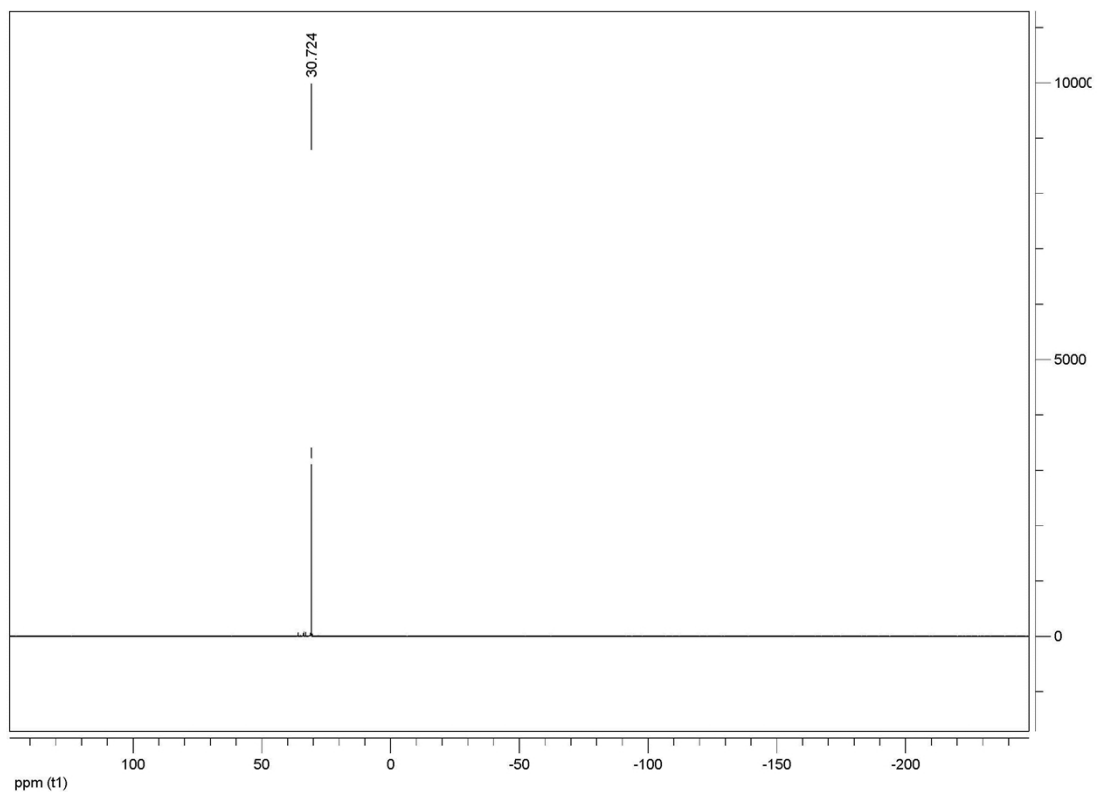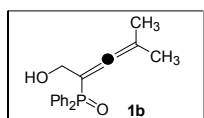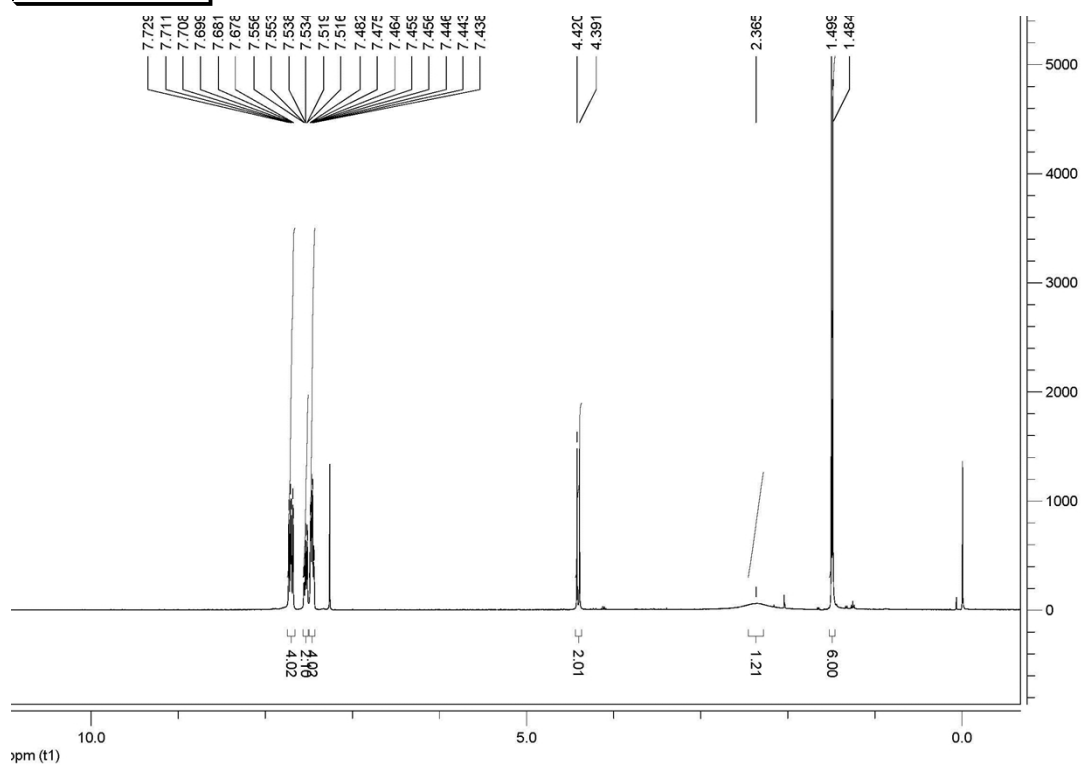

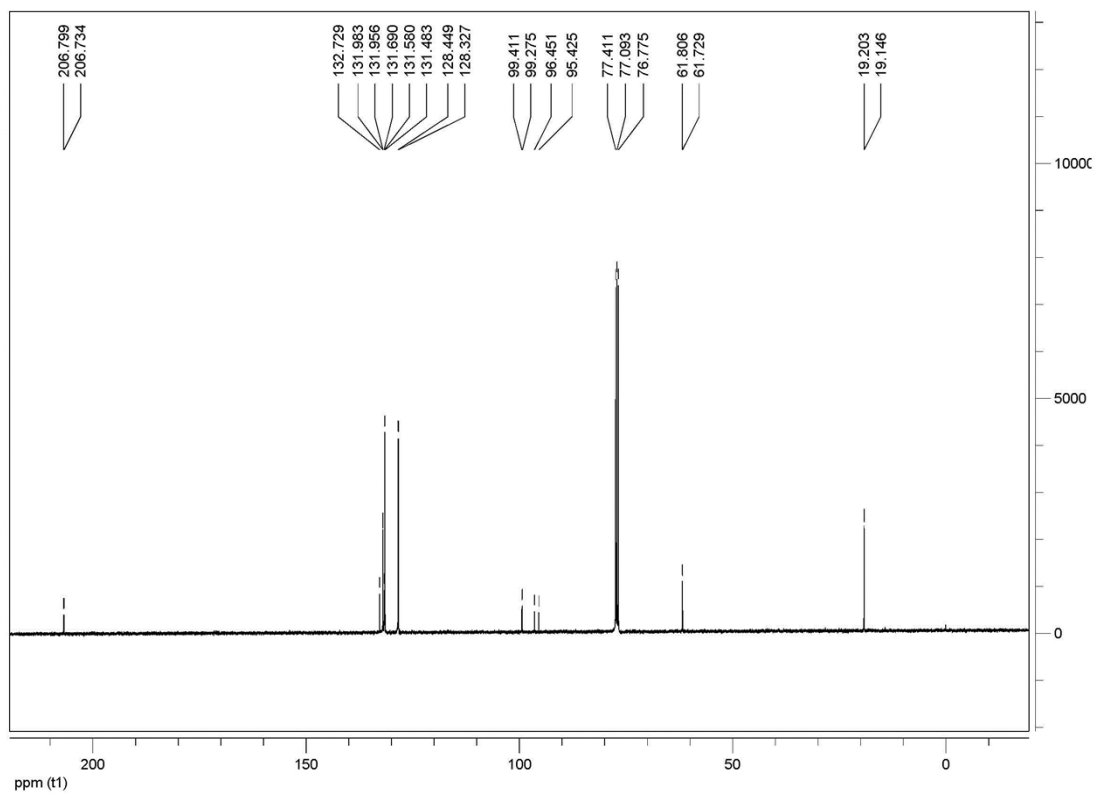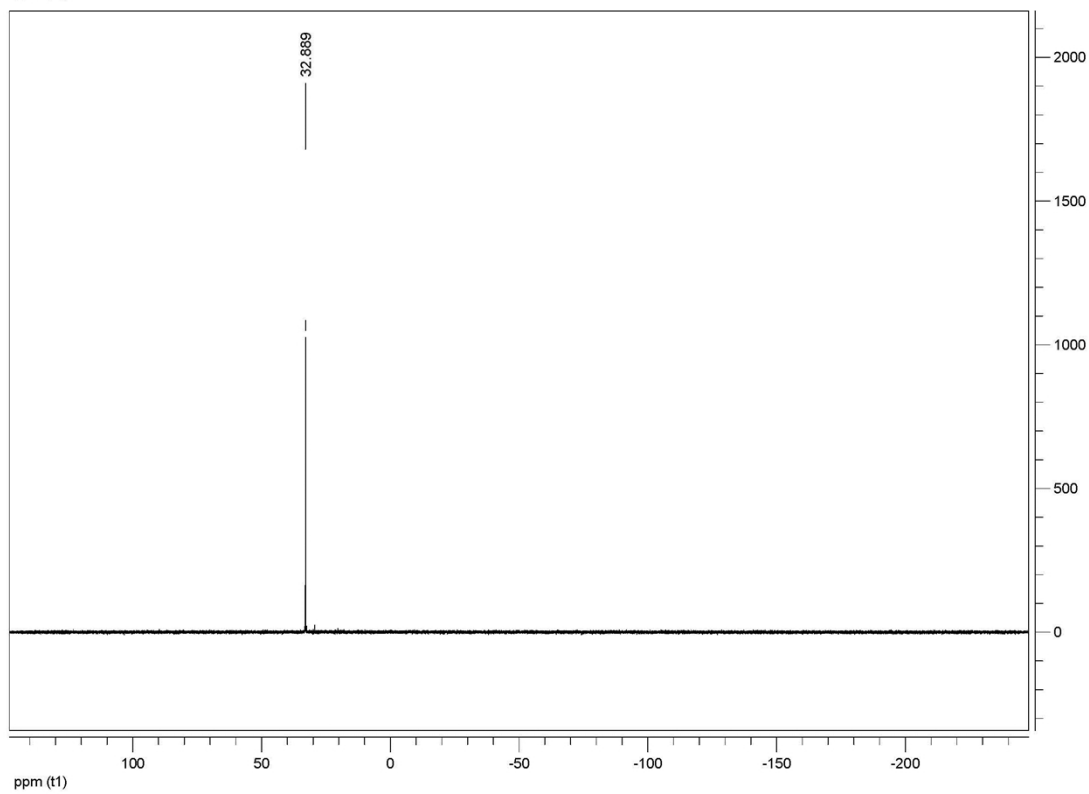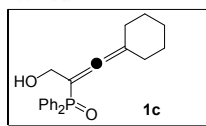

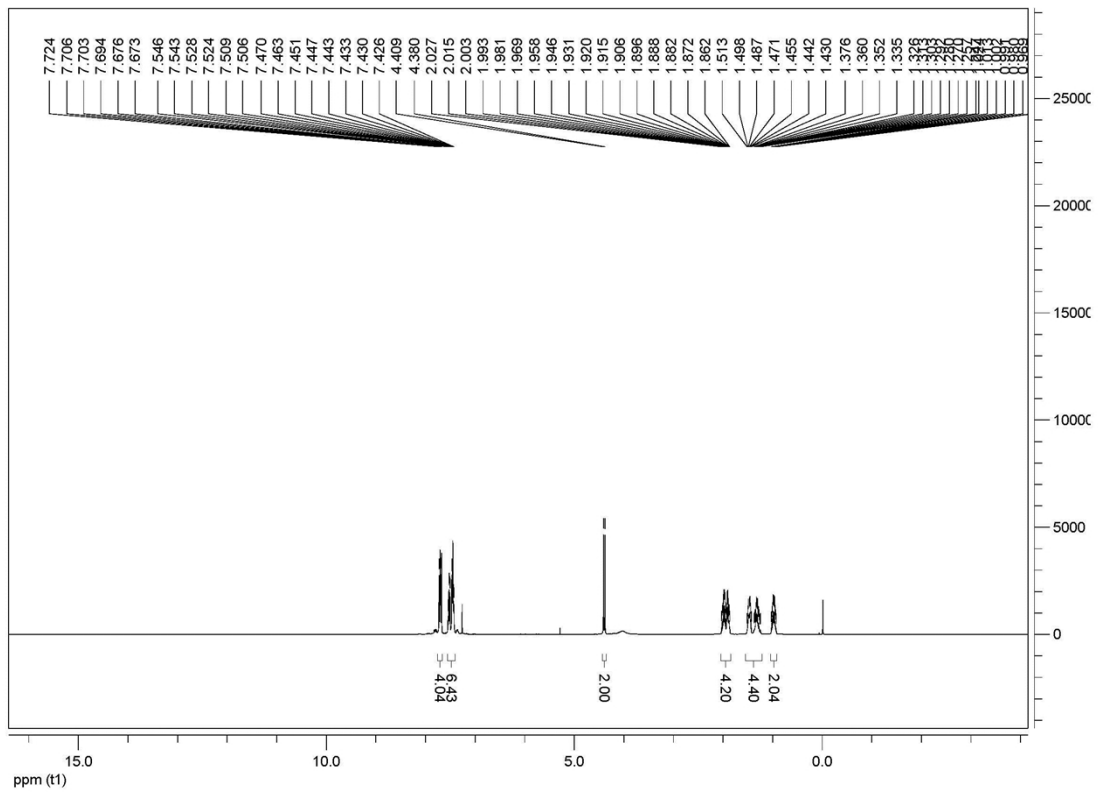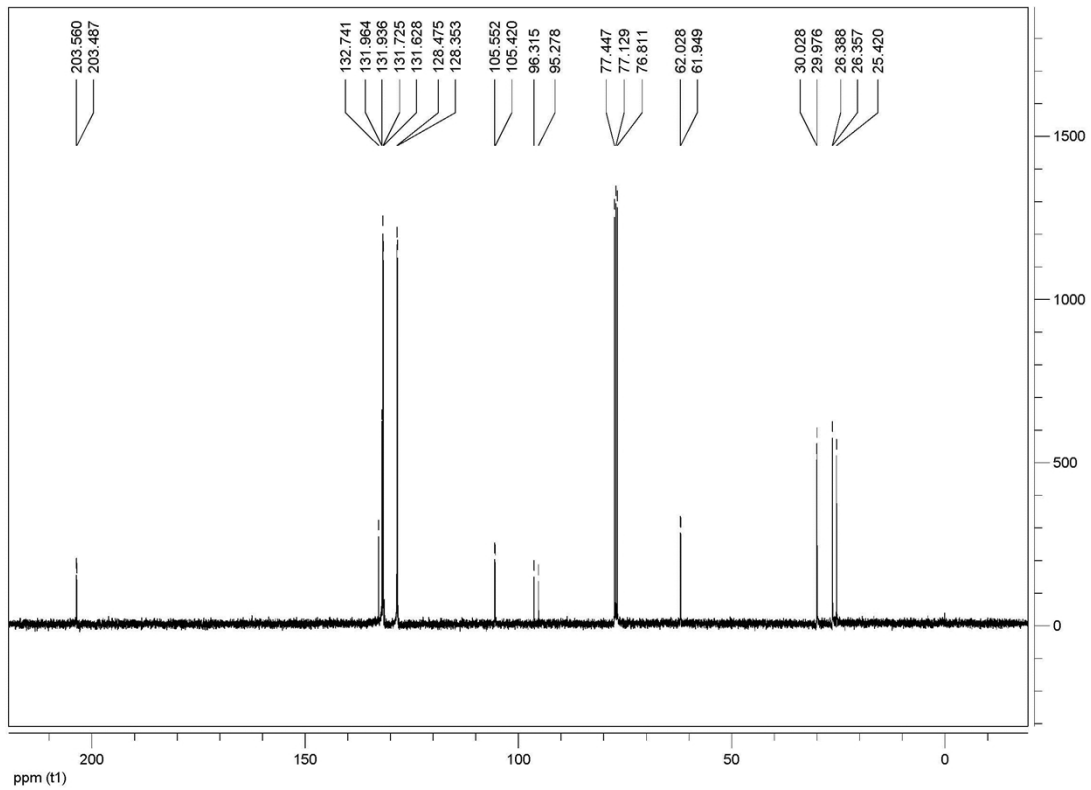

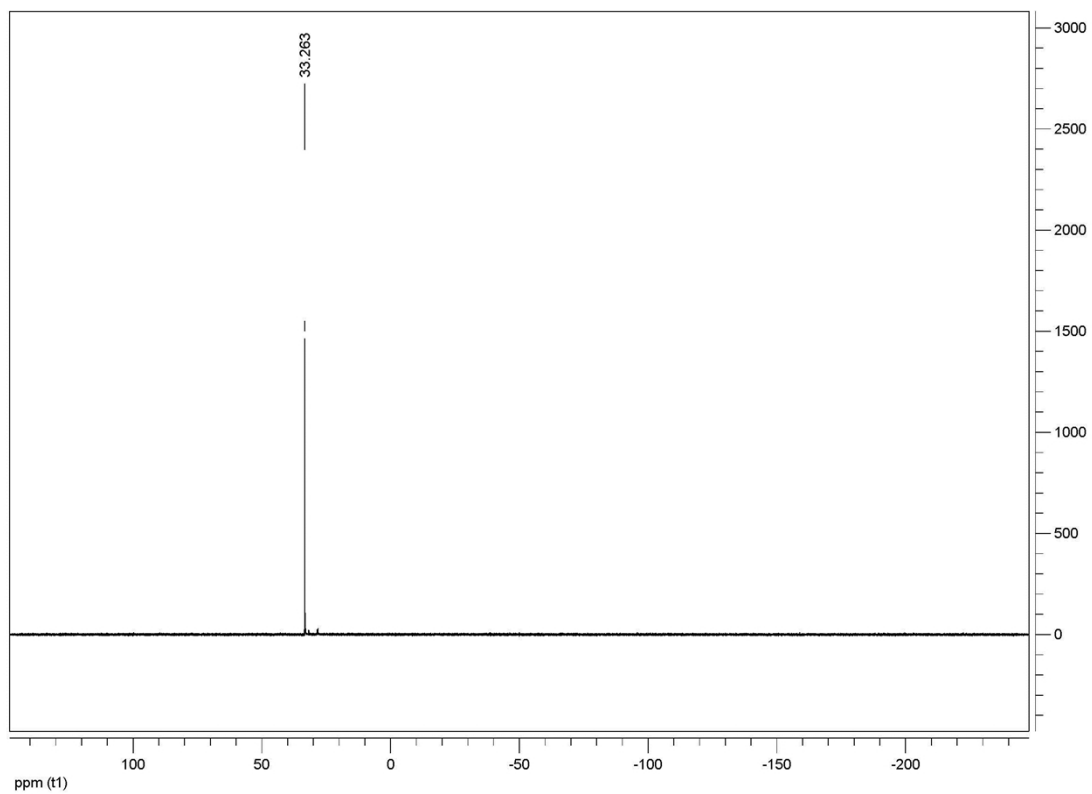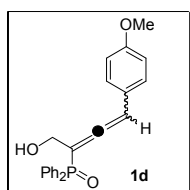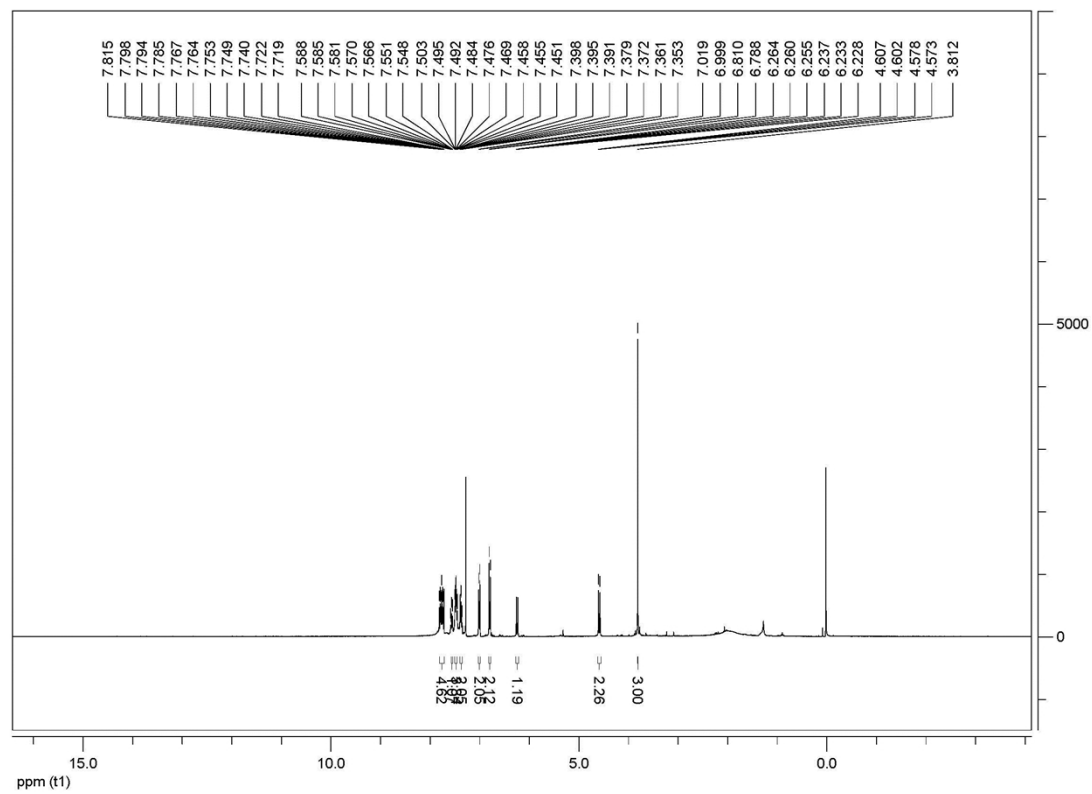

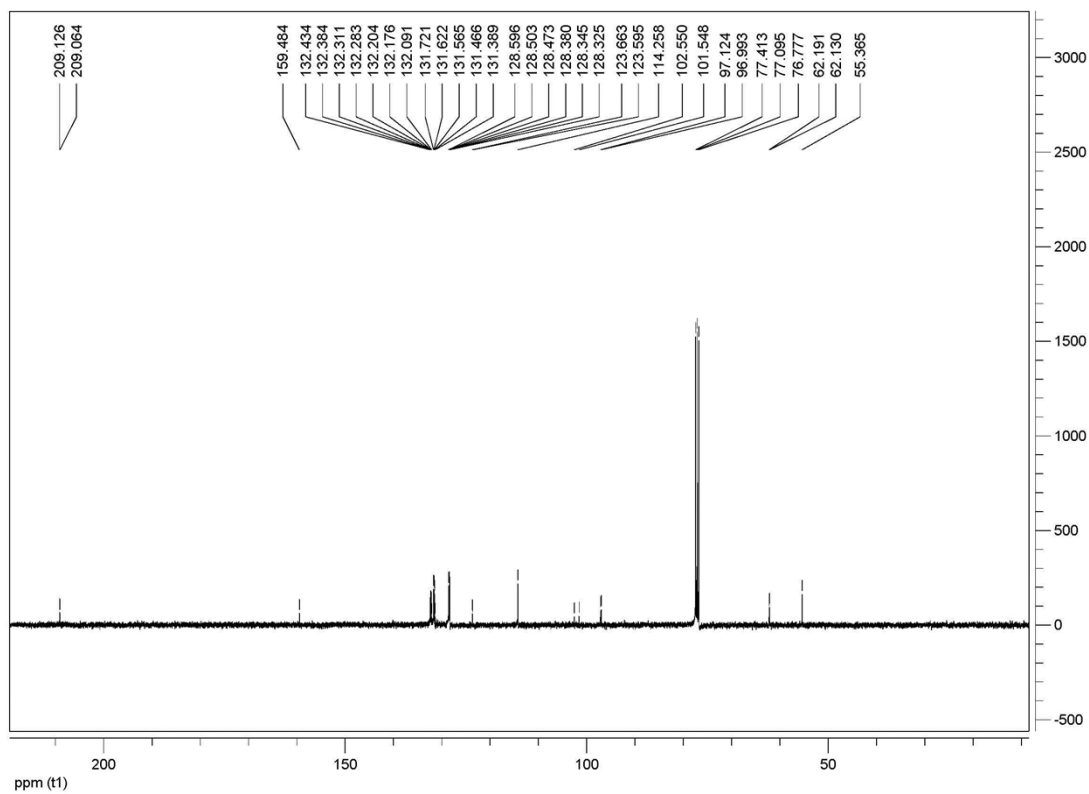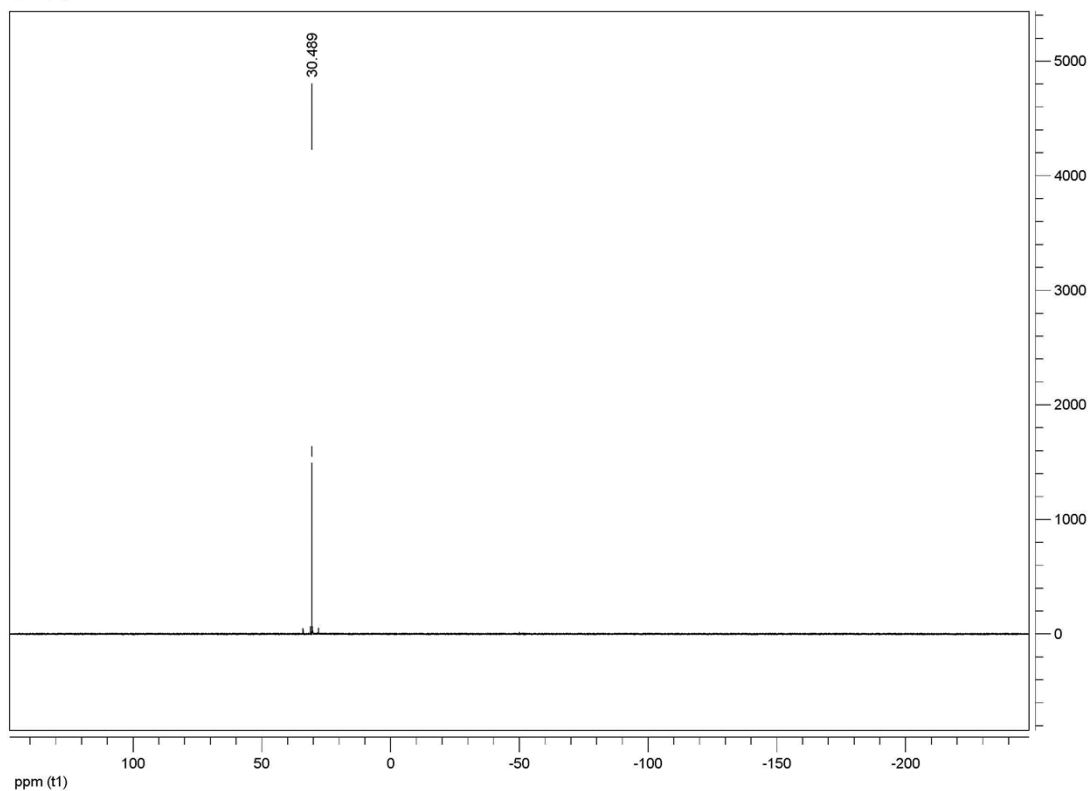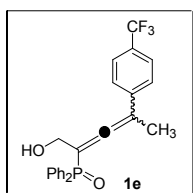

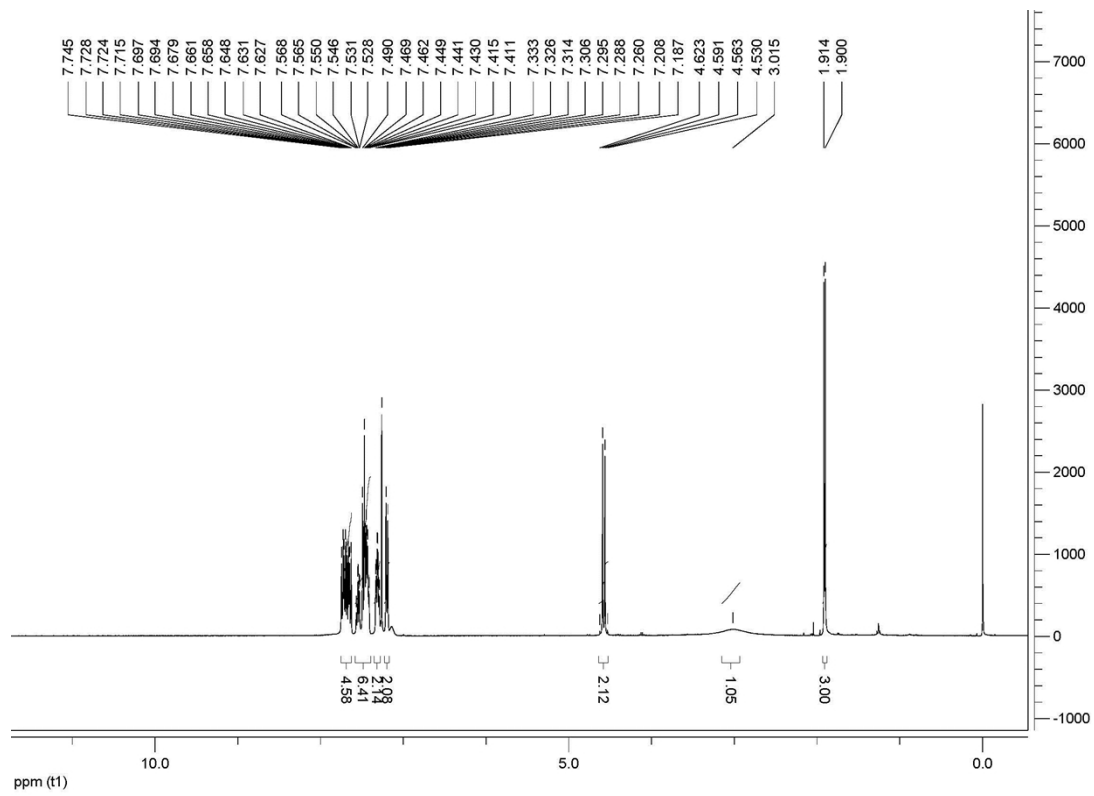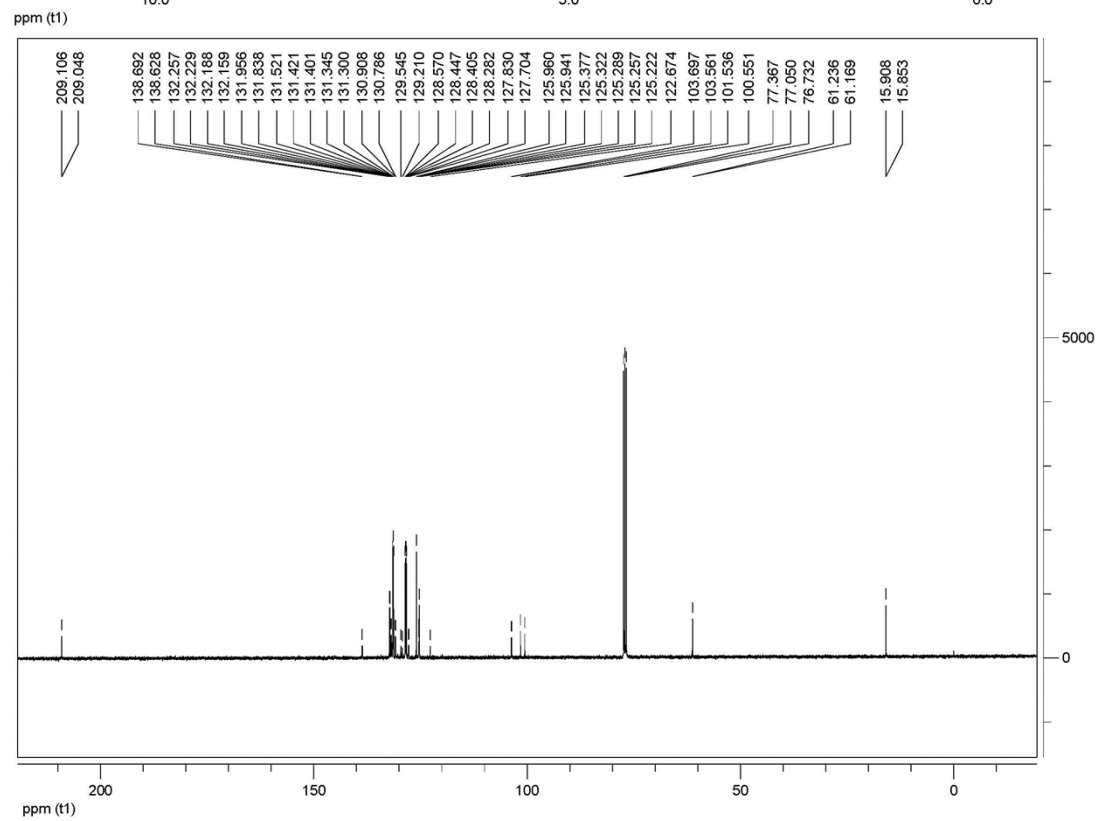

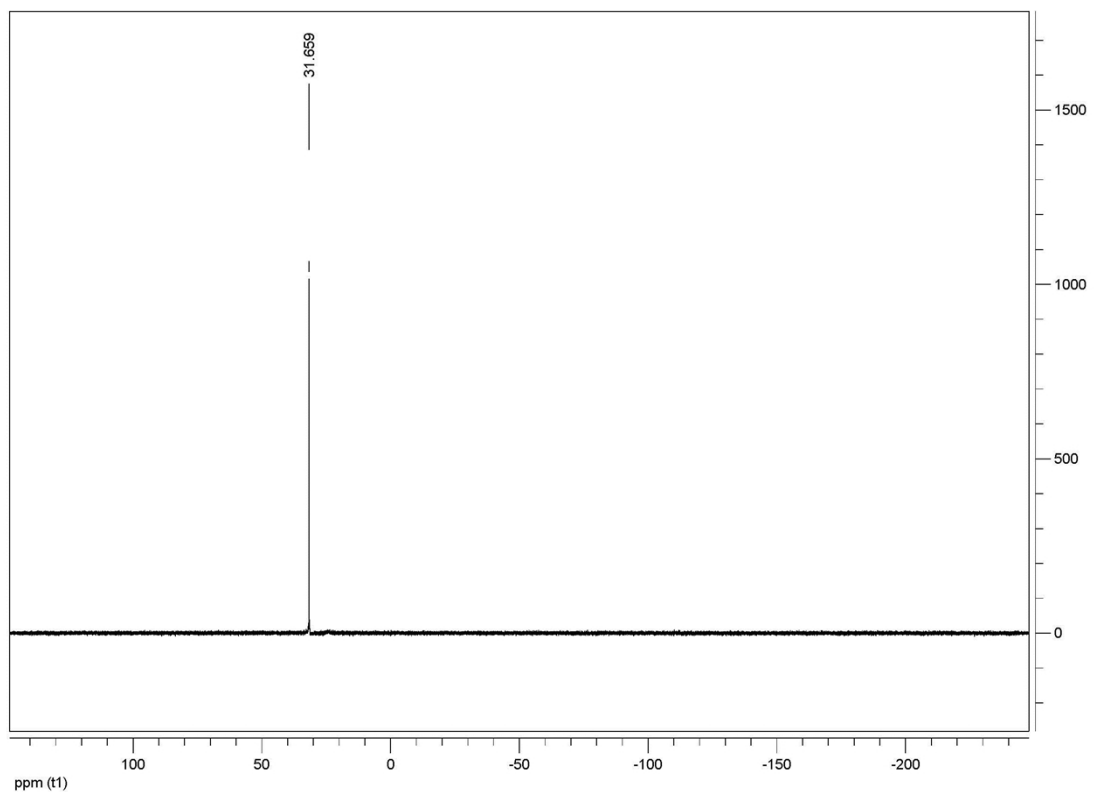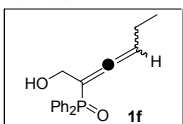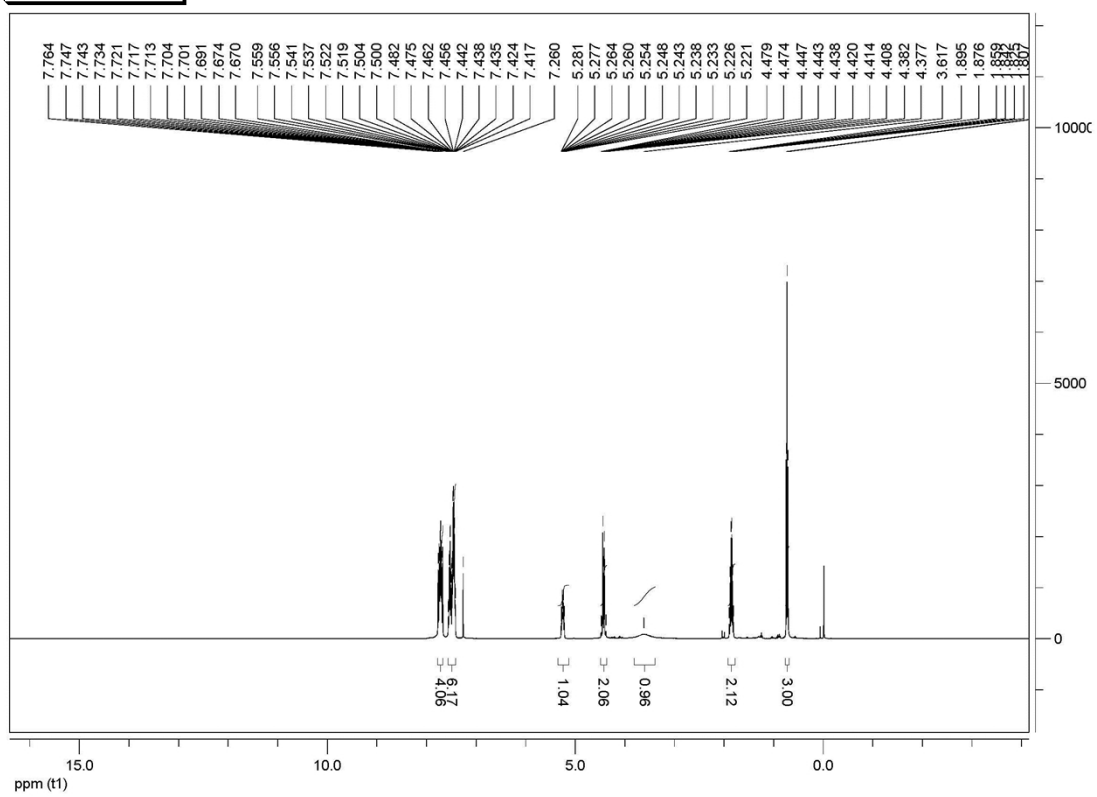

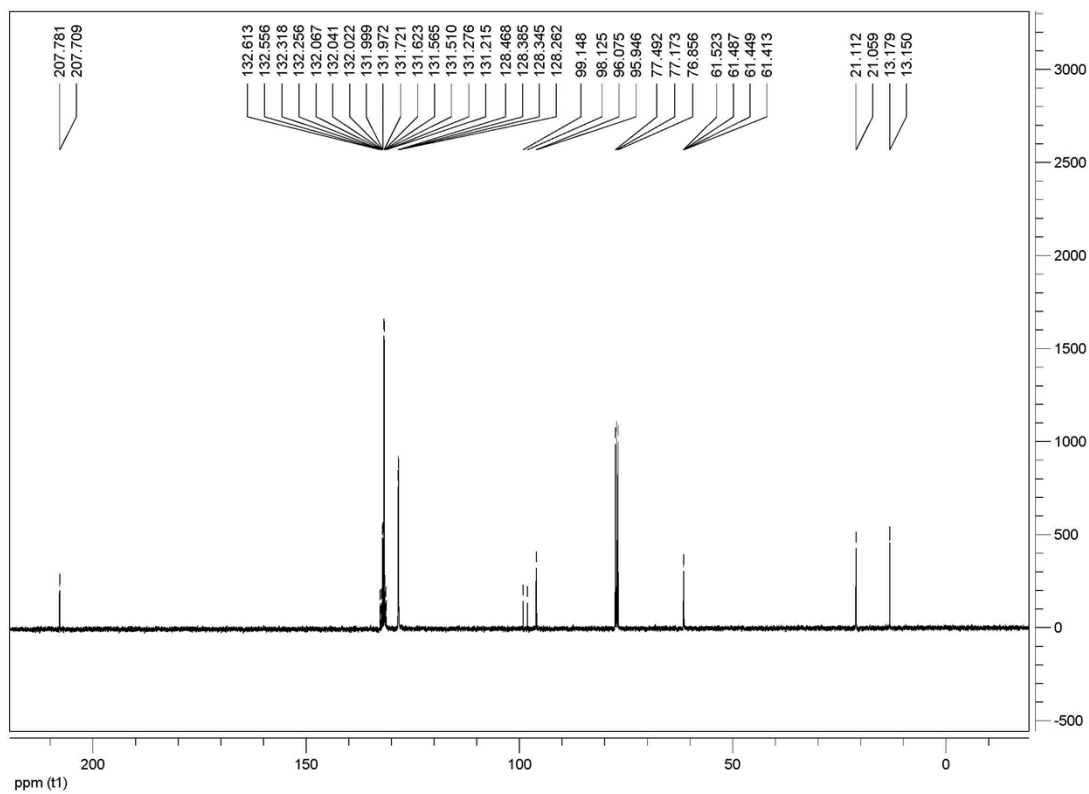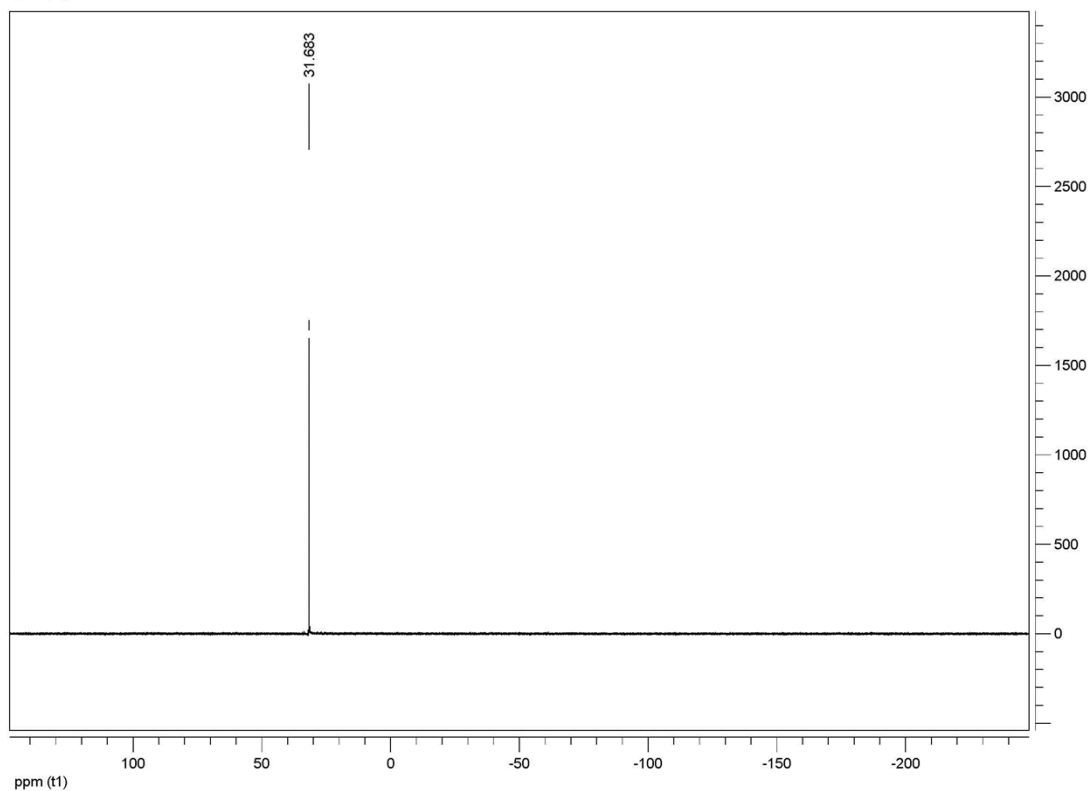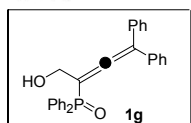



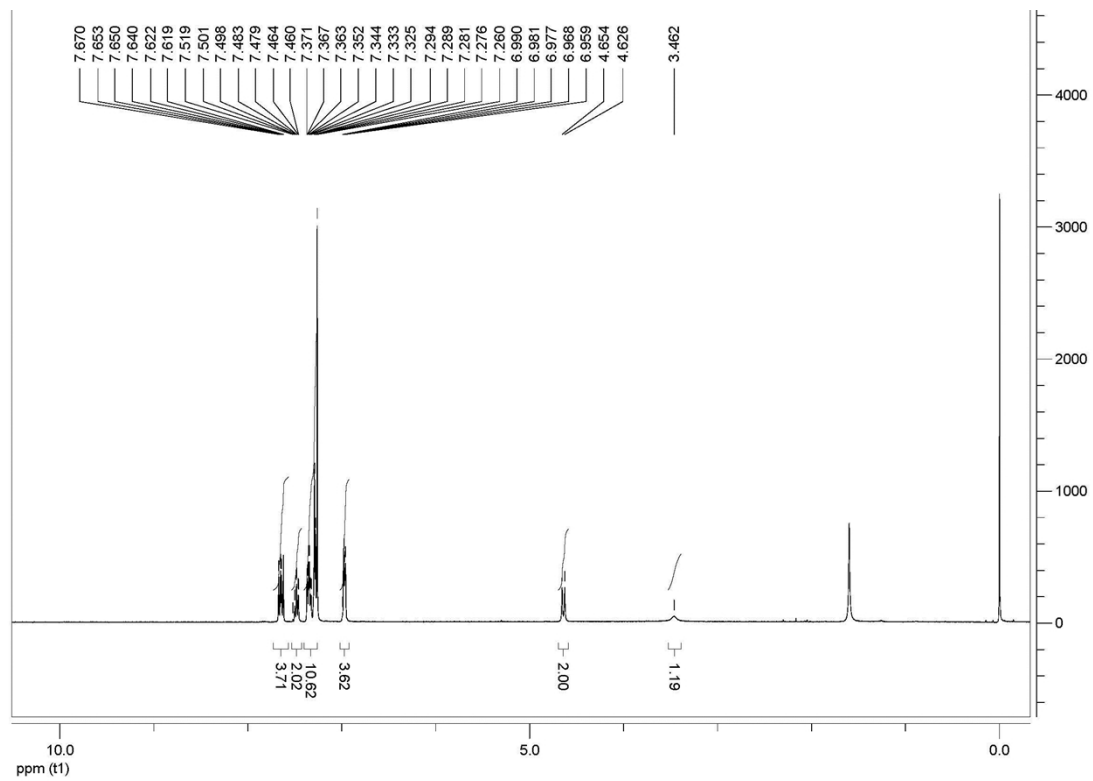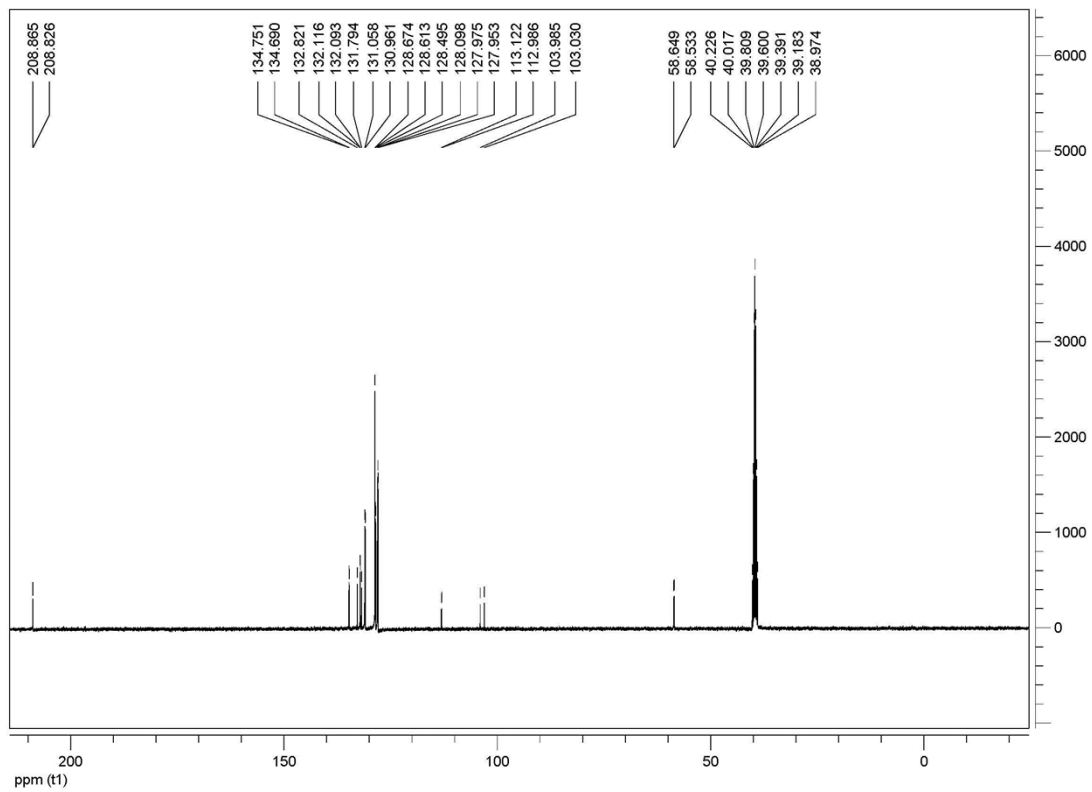



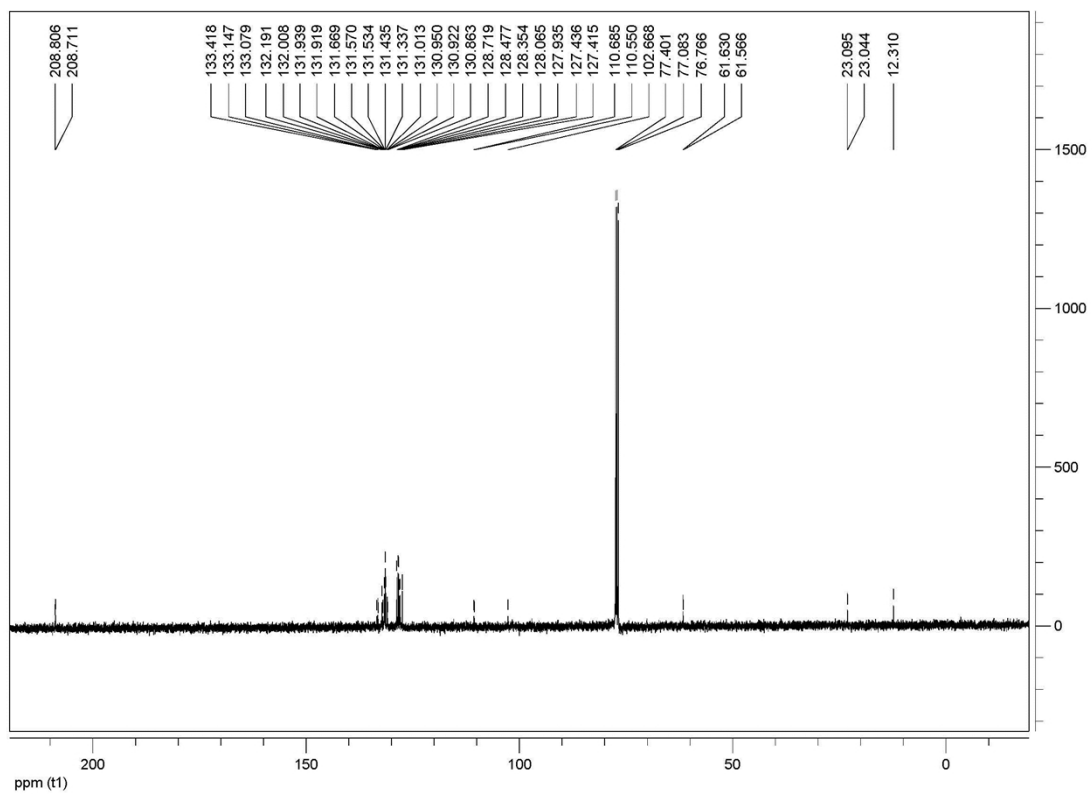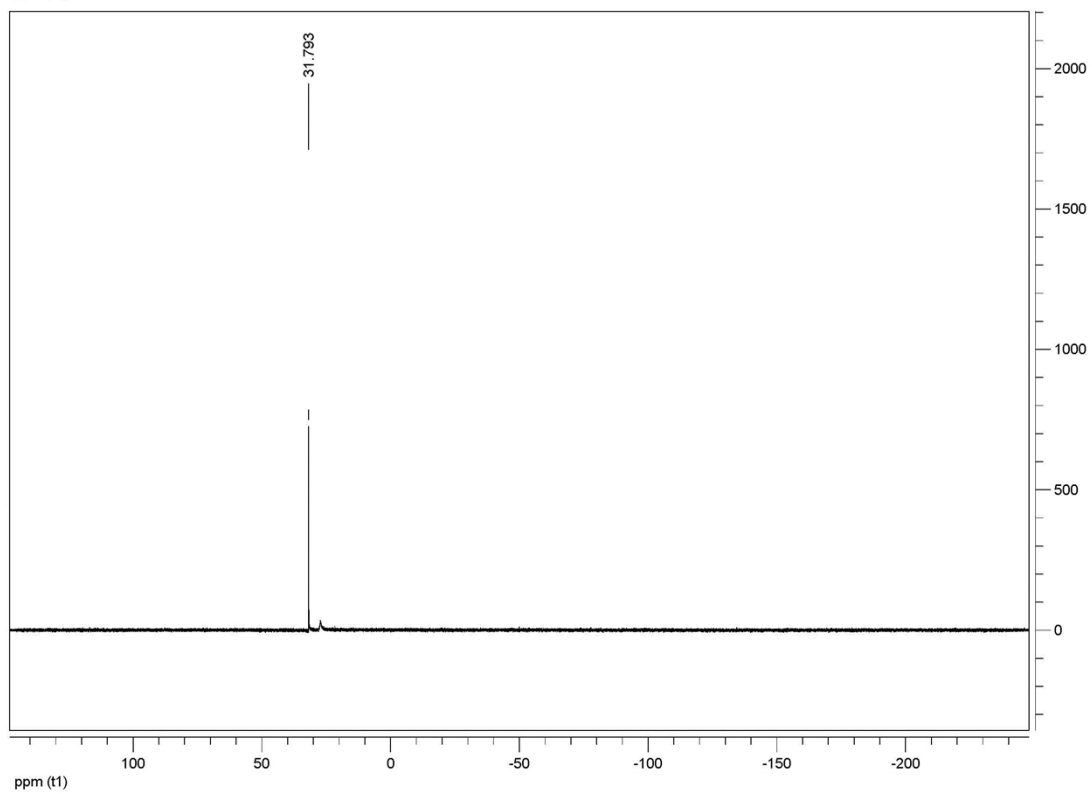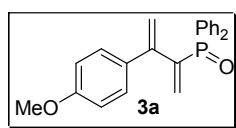

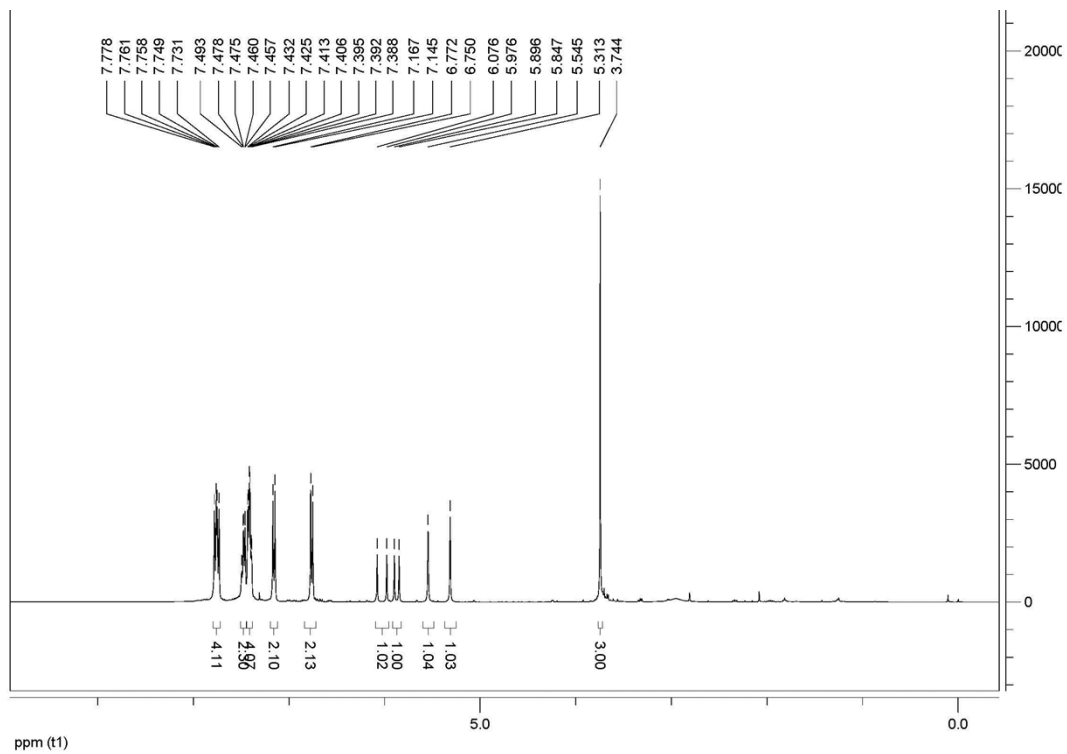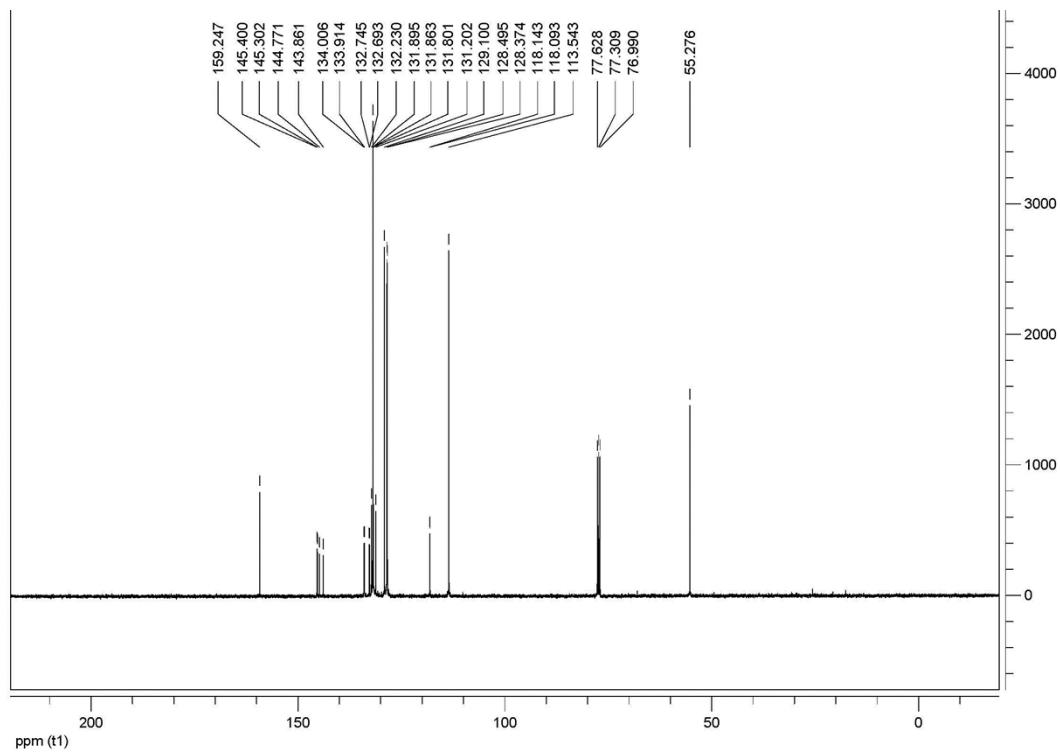

1 #37-41 RT: 0.42-0.46 AV: 5 NL: 7.12E4  
T: FTMS (1,1) + p ESI Full ms [50.00-1000.00]

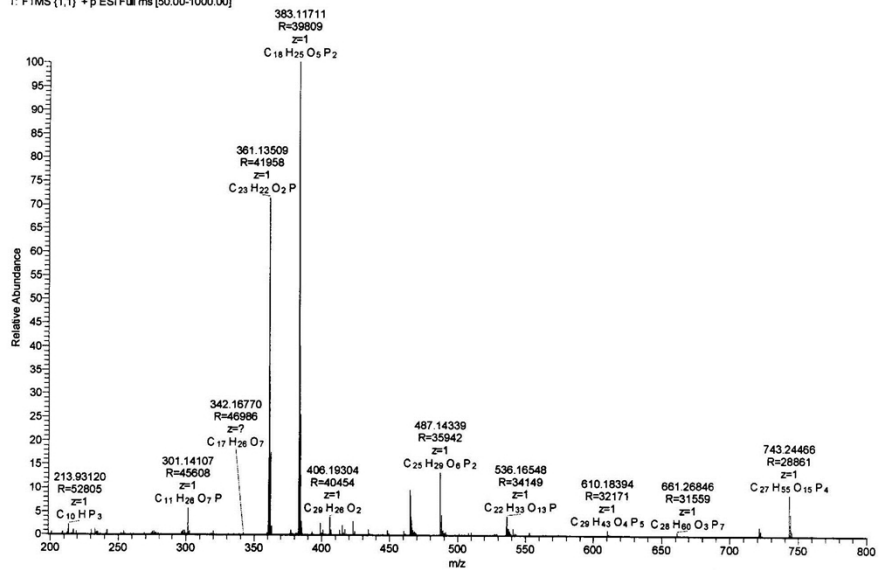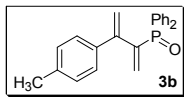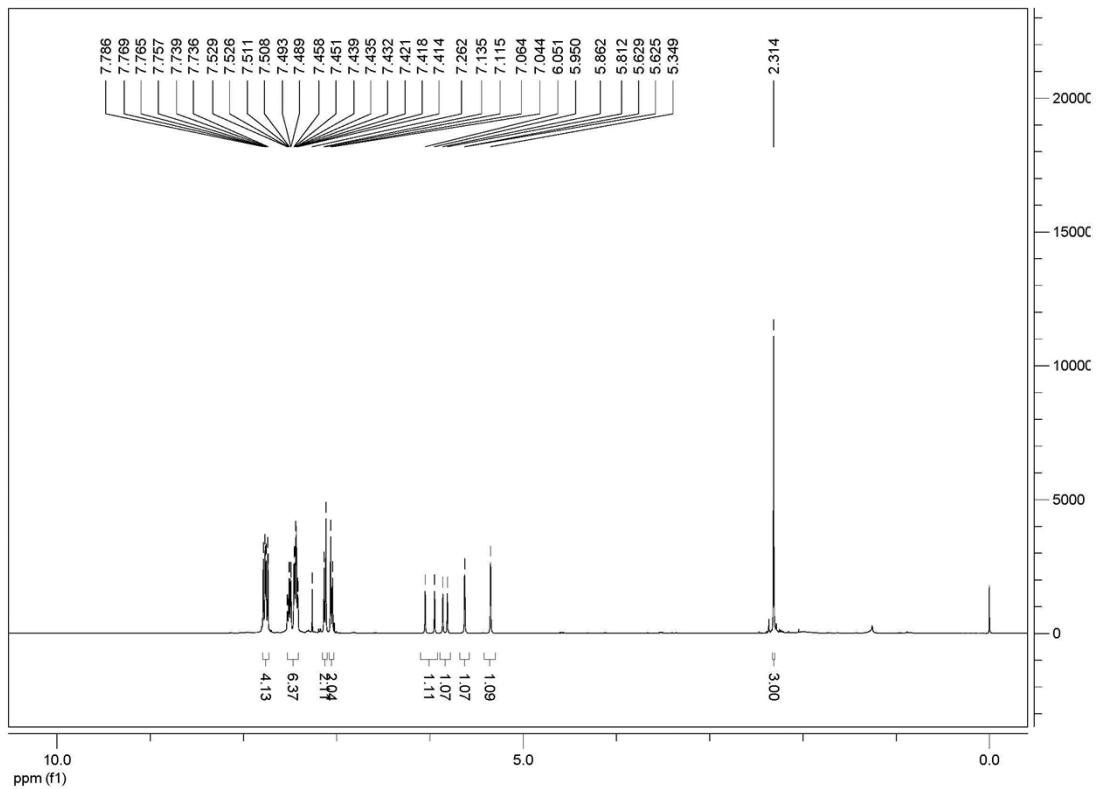

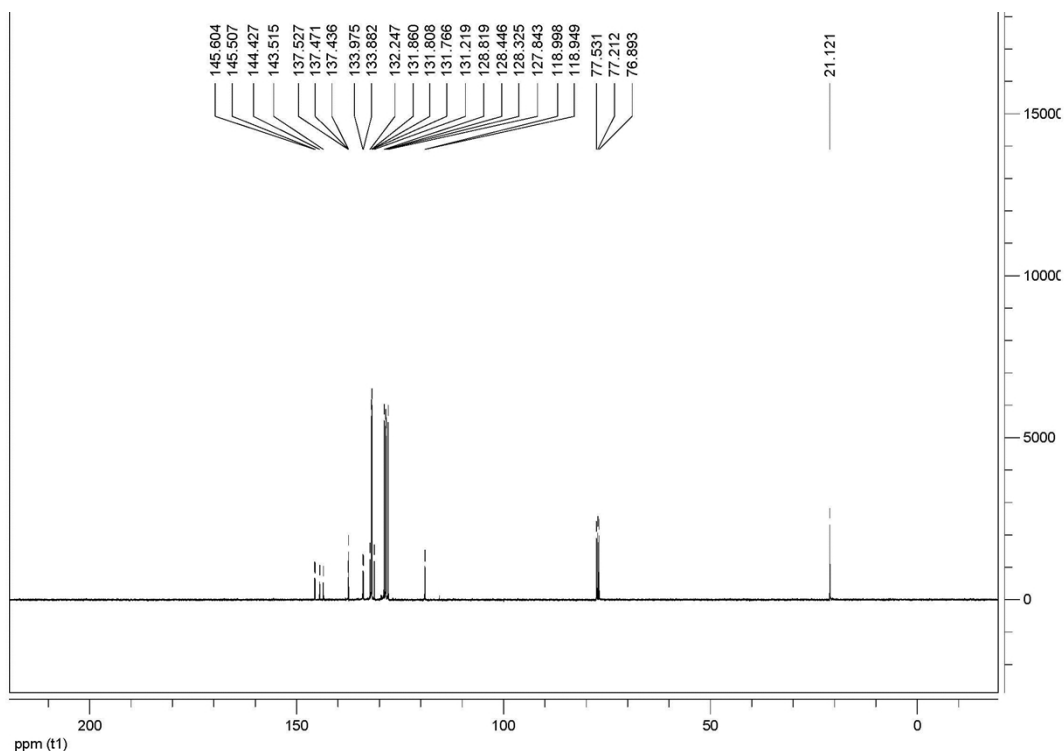

15 #40-41 RT: 0.35-0.36 AV: 2 NL: 5.88E5  
 T: FTMS (1,1) + p ESI Full ms [100.00-1000.00]

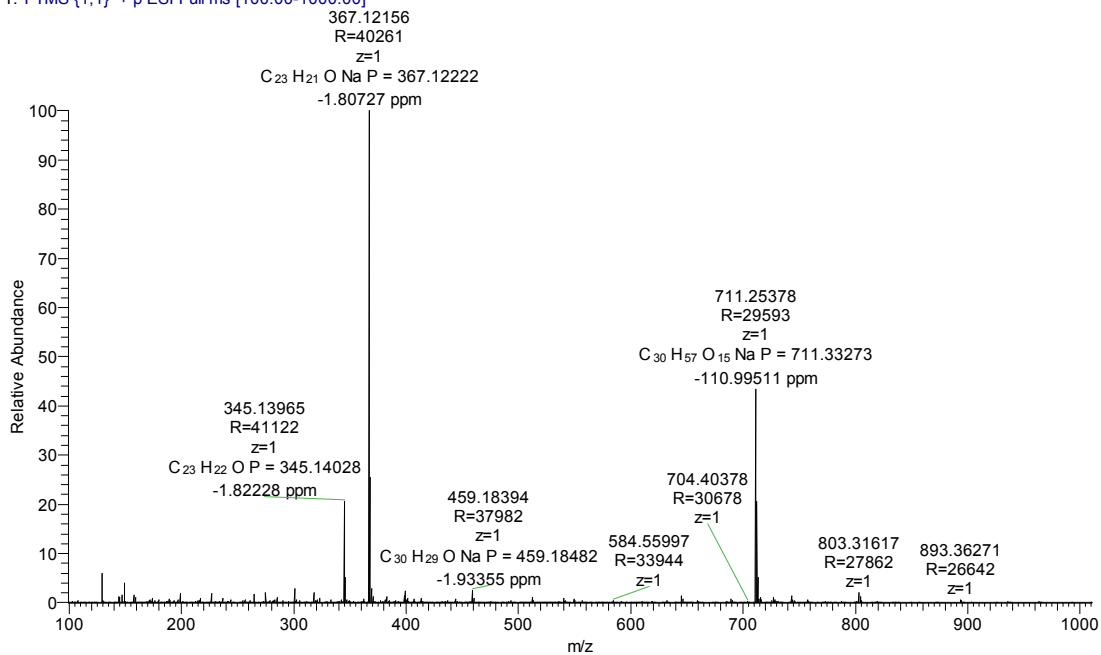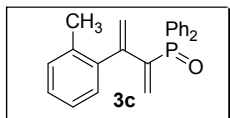

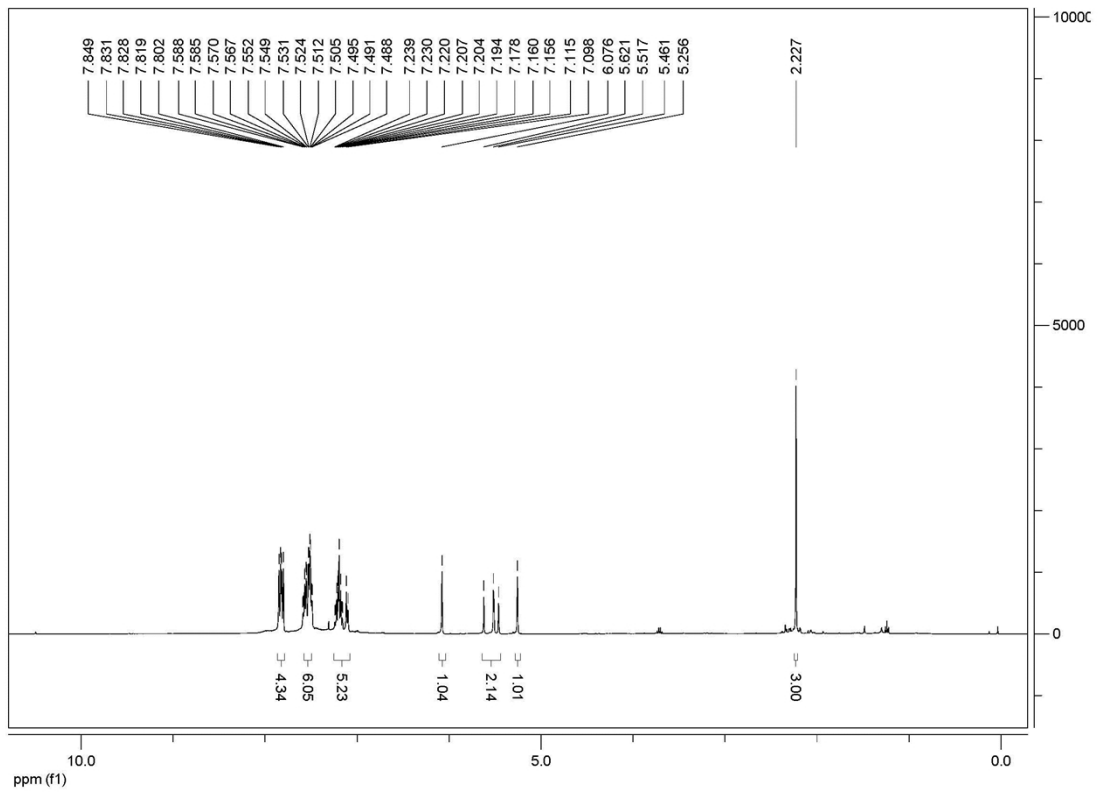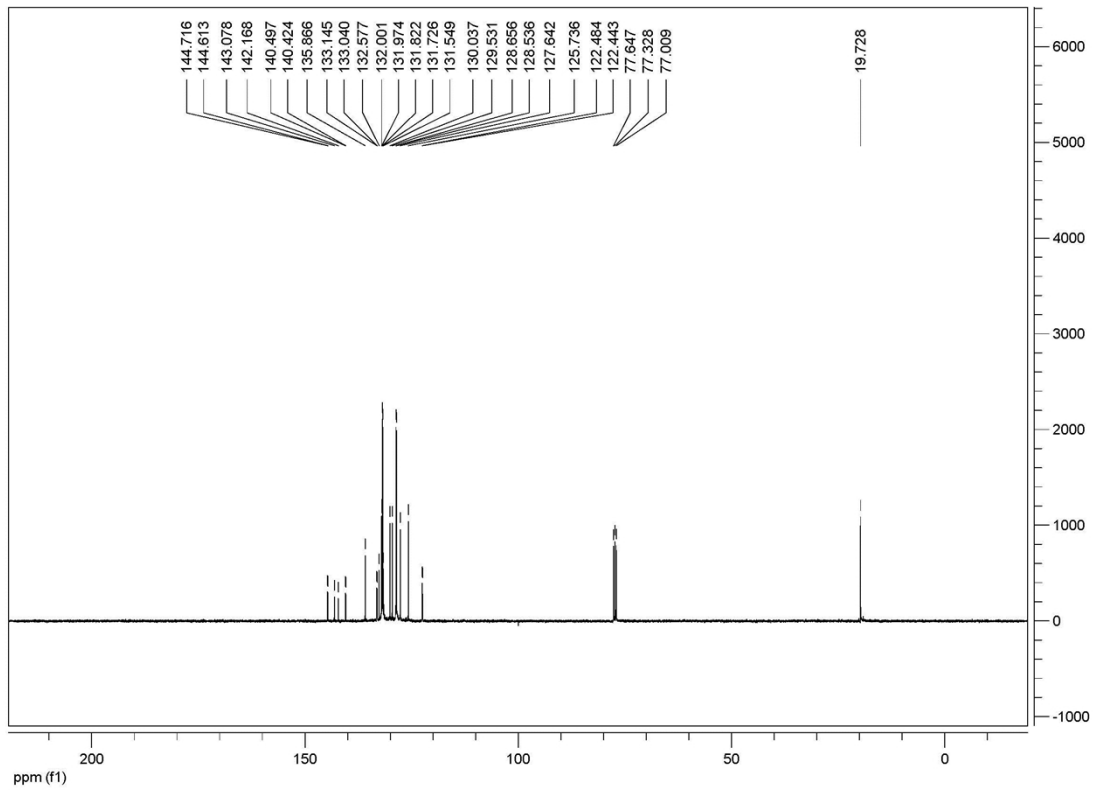

20 #52 RT: 0.42 AV: 1 NL: 1.62E6  
 T: FTMS {1,1} + p ESI Full ms [100.00-1000.00]

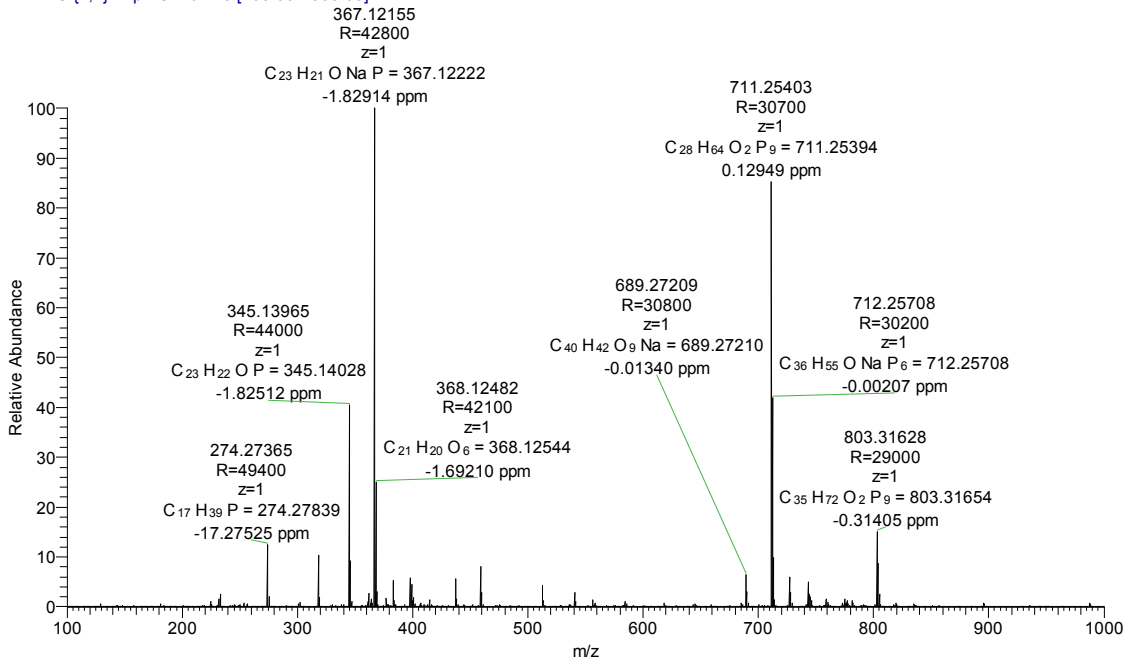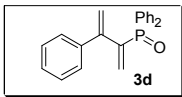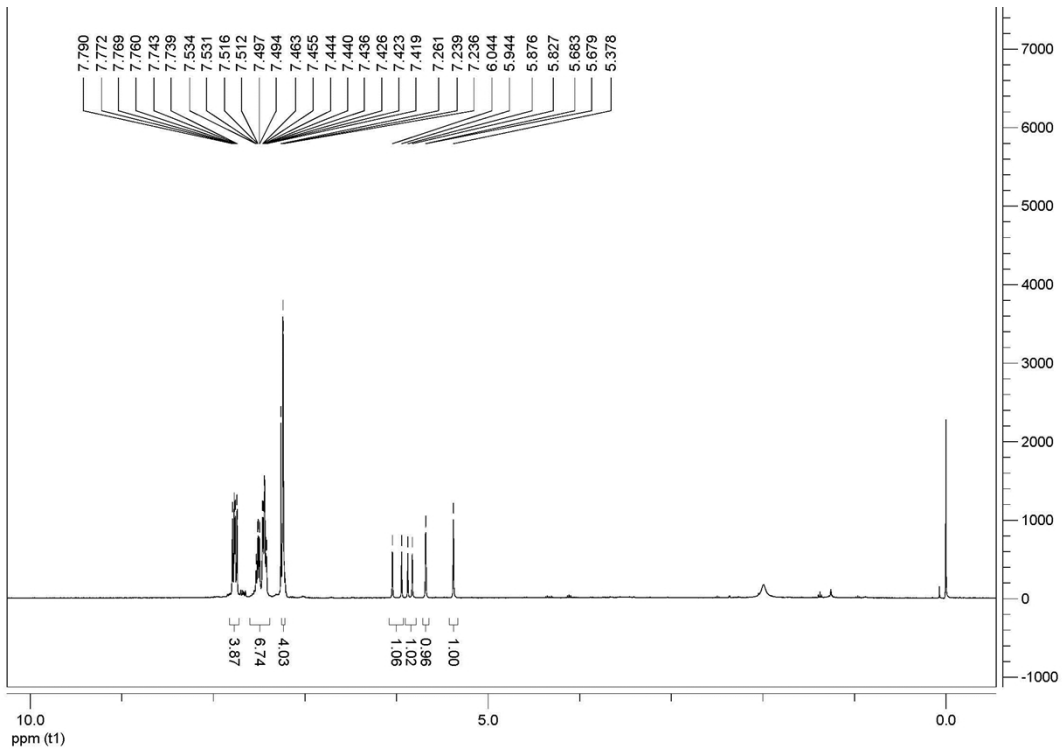



10 #35-38 RT: 0.30-0.33 AV: 4 NL: 9.89E5  
 T: FTMS (1,1) + p ESI Full ms [100.00-1000.00]

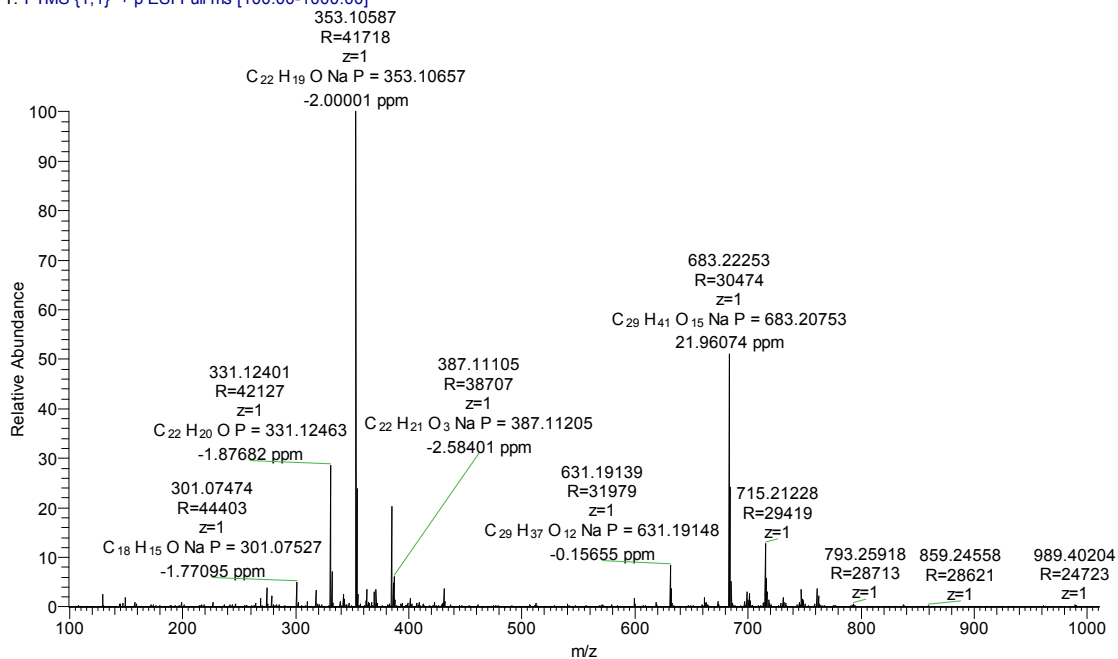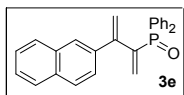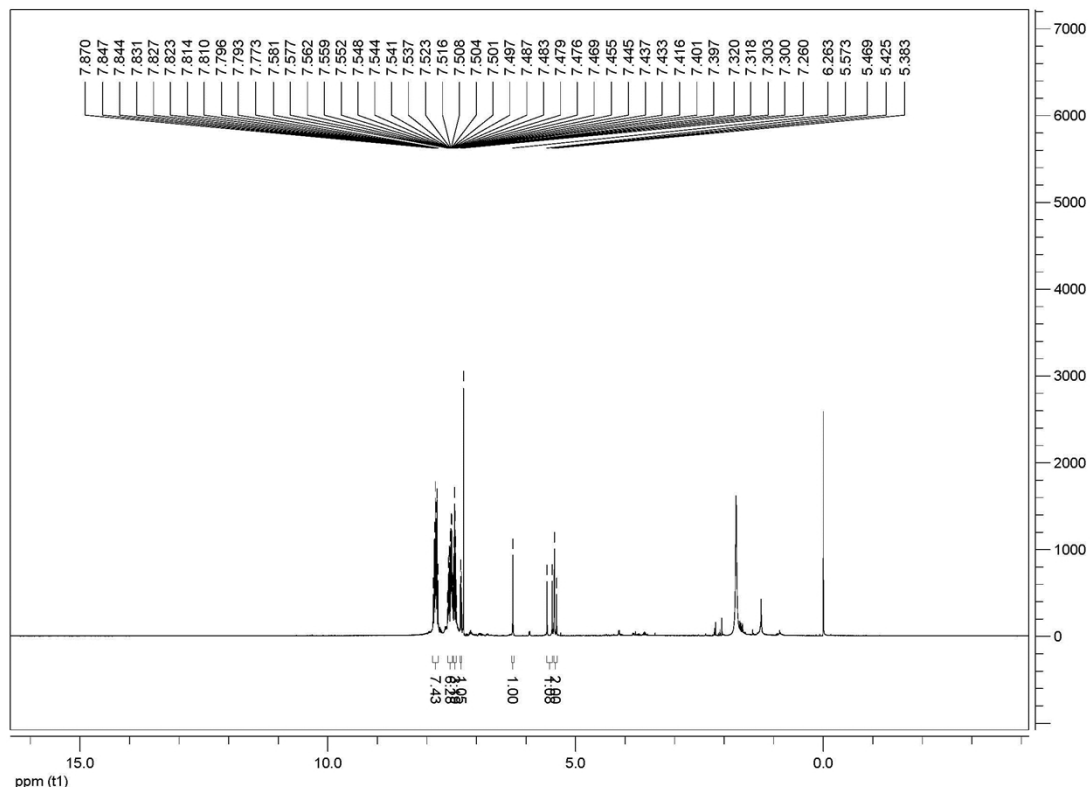

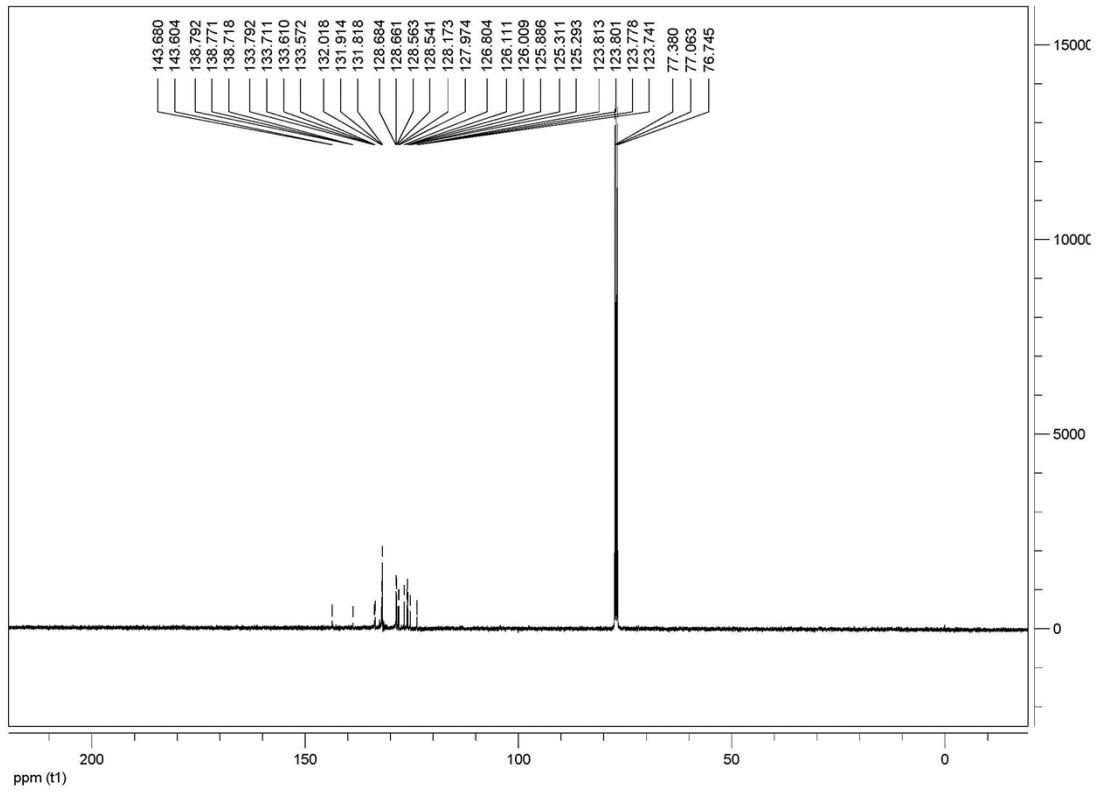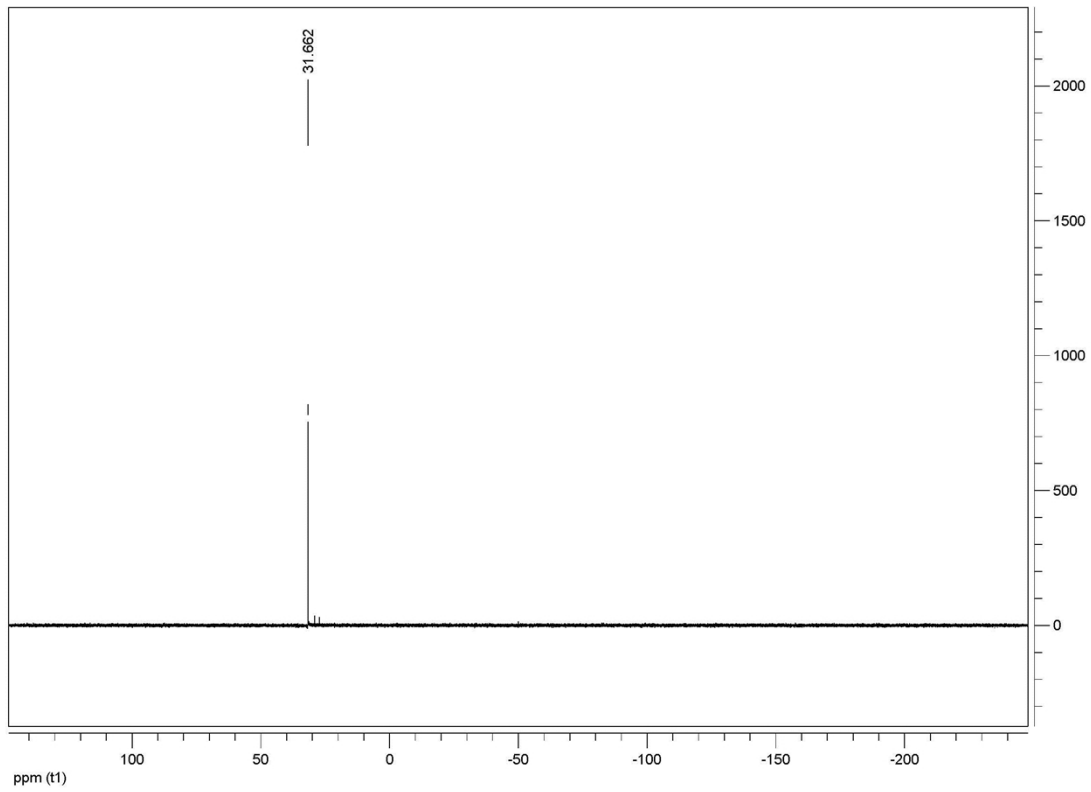

2 #44-49 RT: 0.50-0.55 AV: 6 NL: 4.28E4  
 T: FTMS (1,1) → p ESI Full ms [50.00-1000.00]

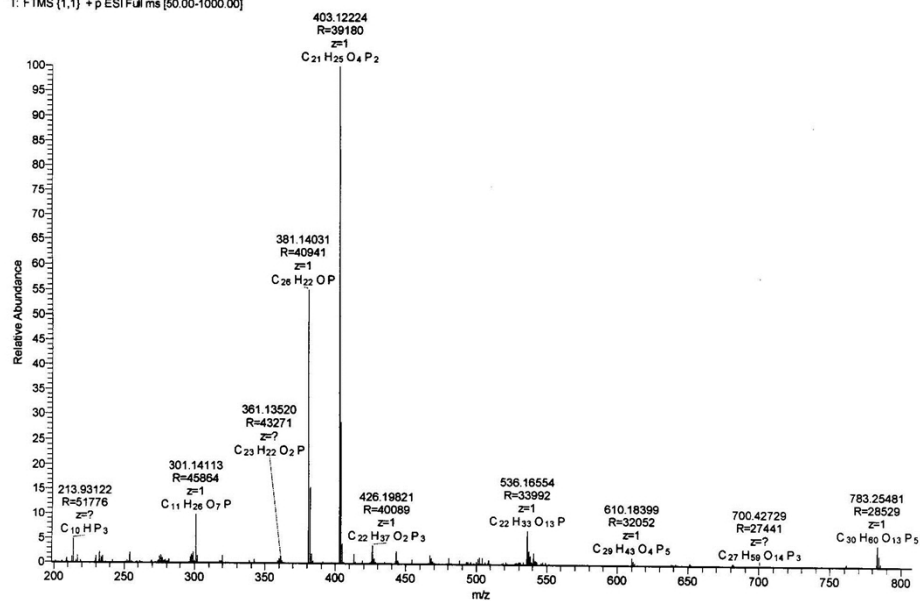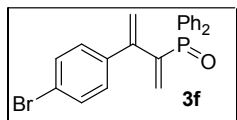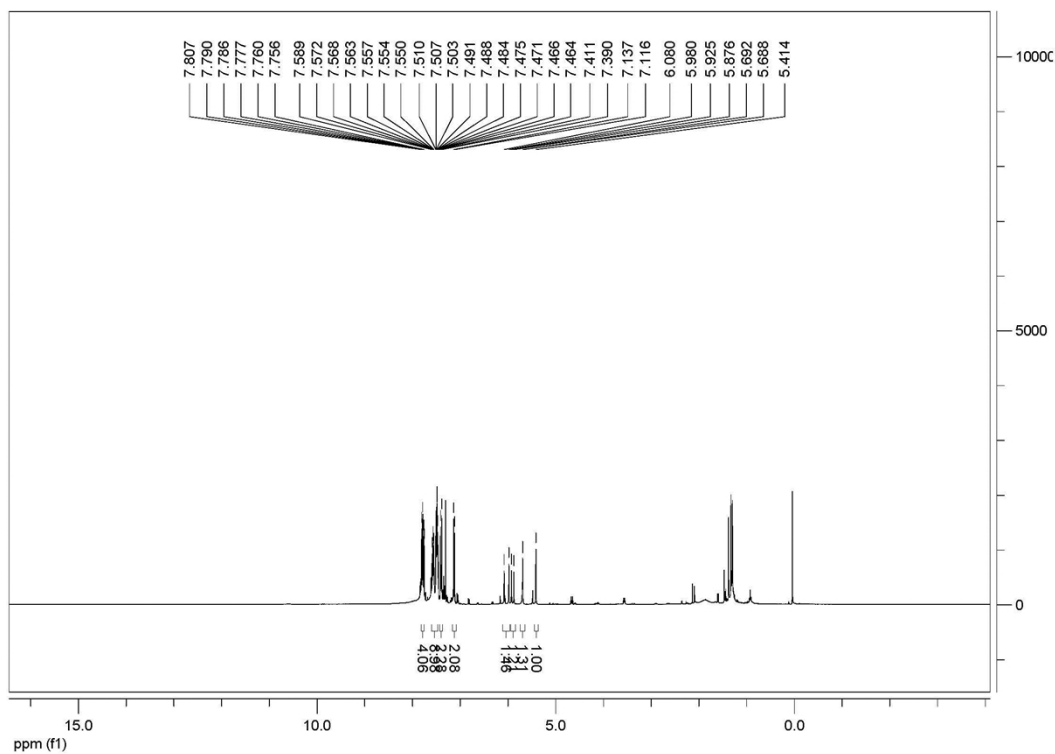

17 #34-38 RT: 0.29-0.33 AV: 5 NL: 7.44E5  
 T: FTMS {1,1} + p ESI Full ms [100.00-1000.00]

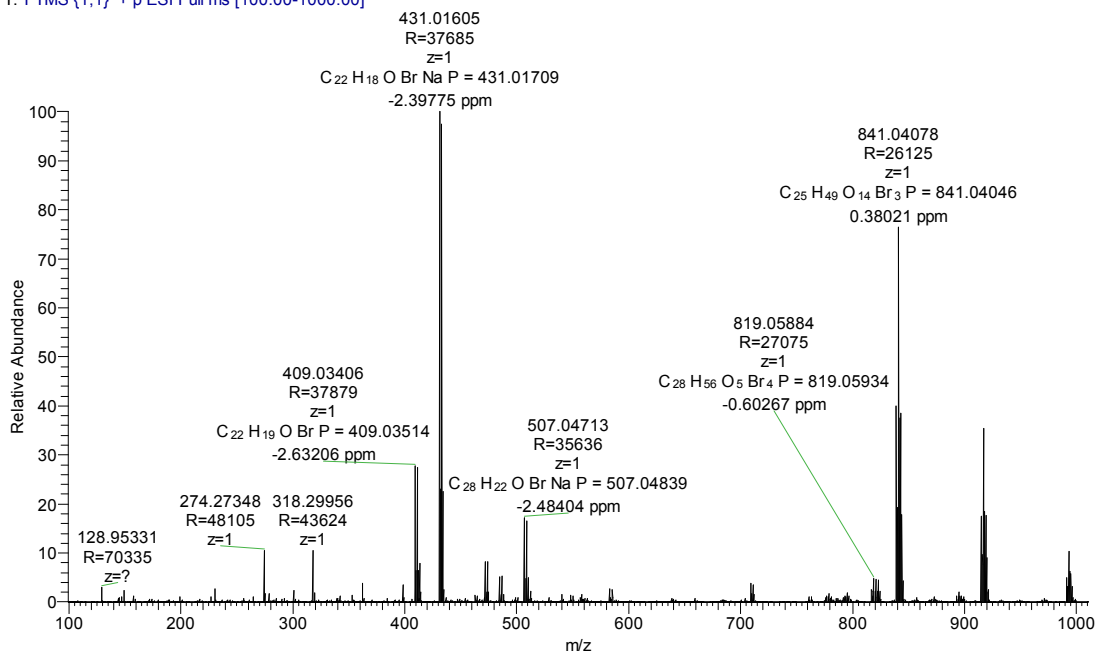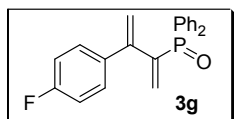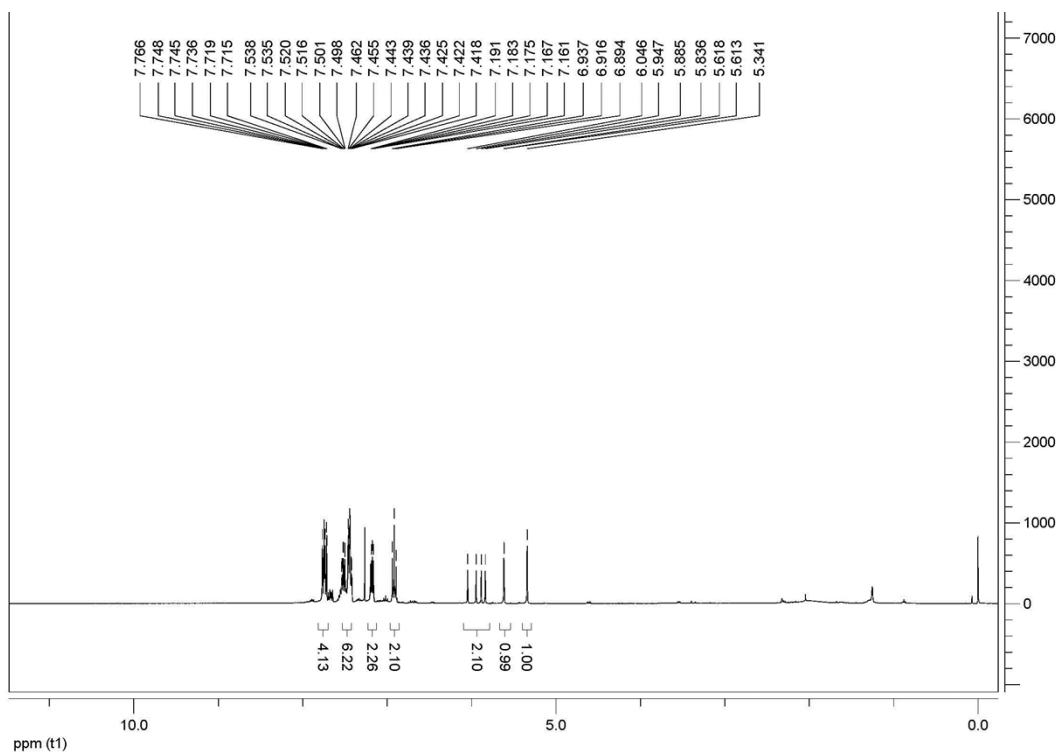

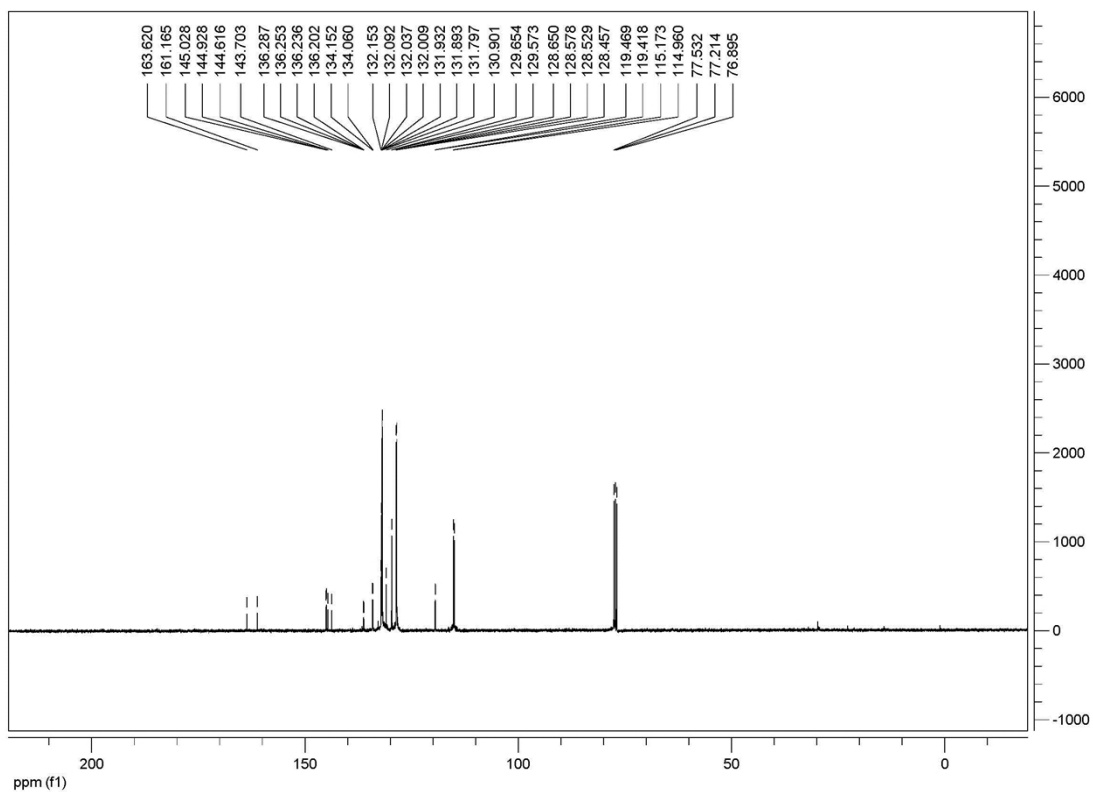

14 #47-48 RT: 0.39-0.40 AV: 2 NL: 1.15E6  
 T: FTMS (1,1) + p ESI Full ms [100.00-1000.00]

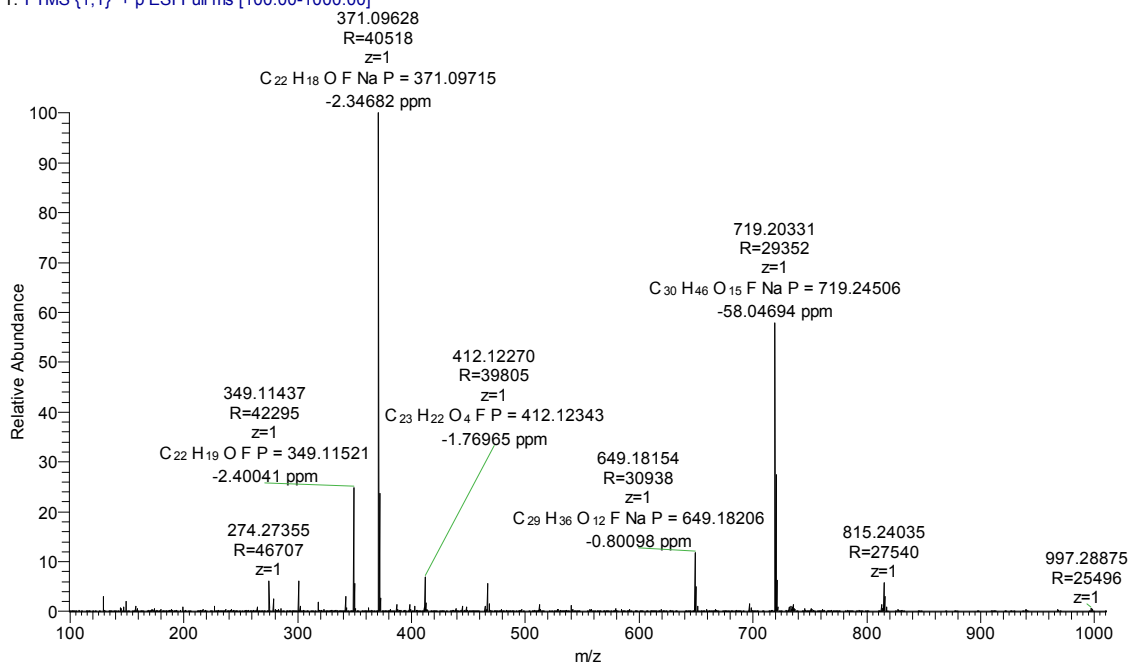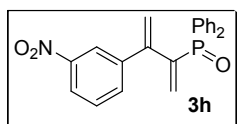

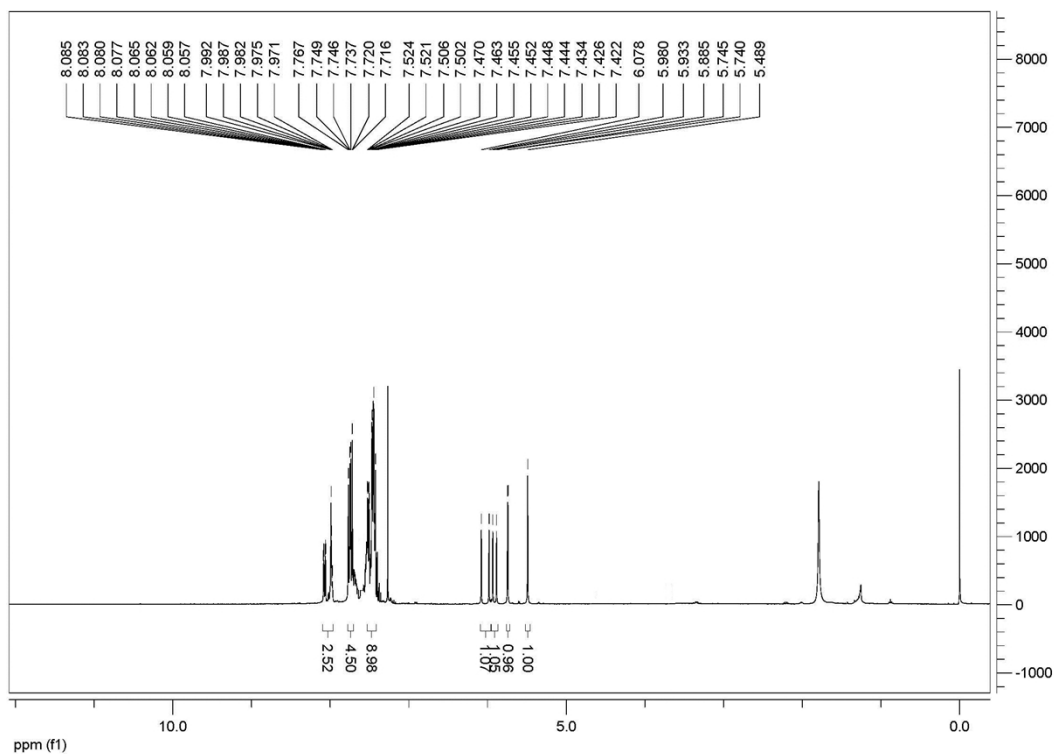

13 #40-44 RT: 0.33-0.37 AV: 5 NL: 1.65E6  
 T: FTMS {1,1} + p ESI Full ms [100.00-1000.00]

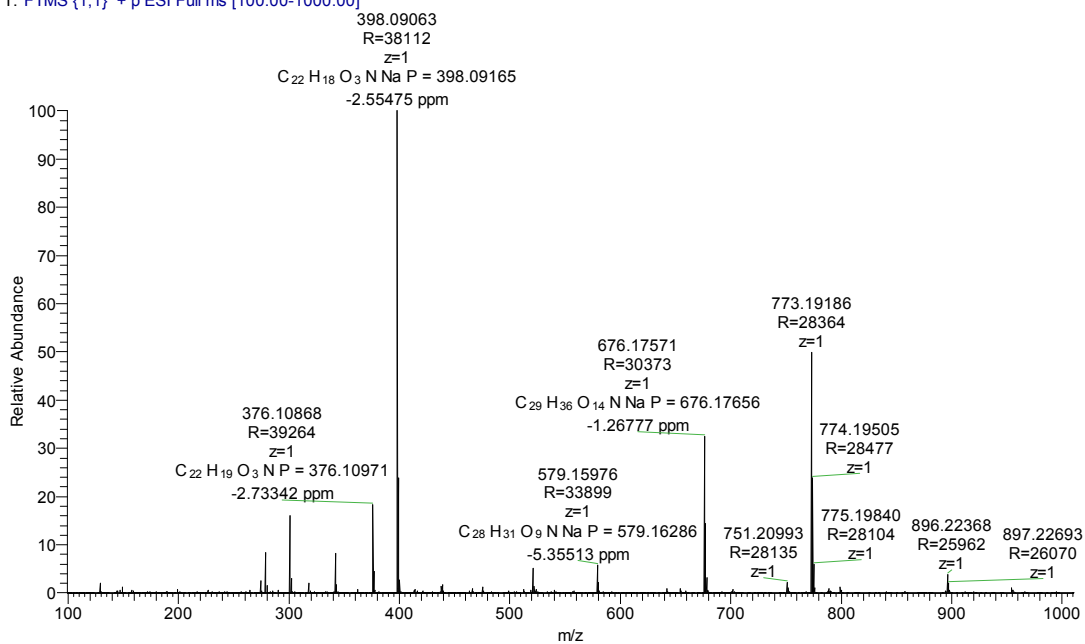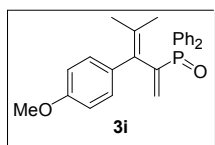

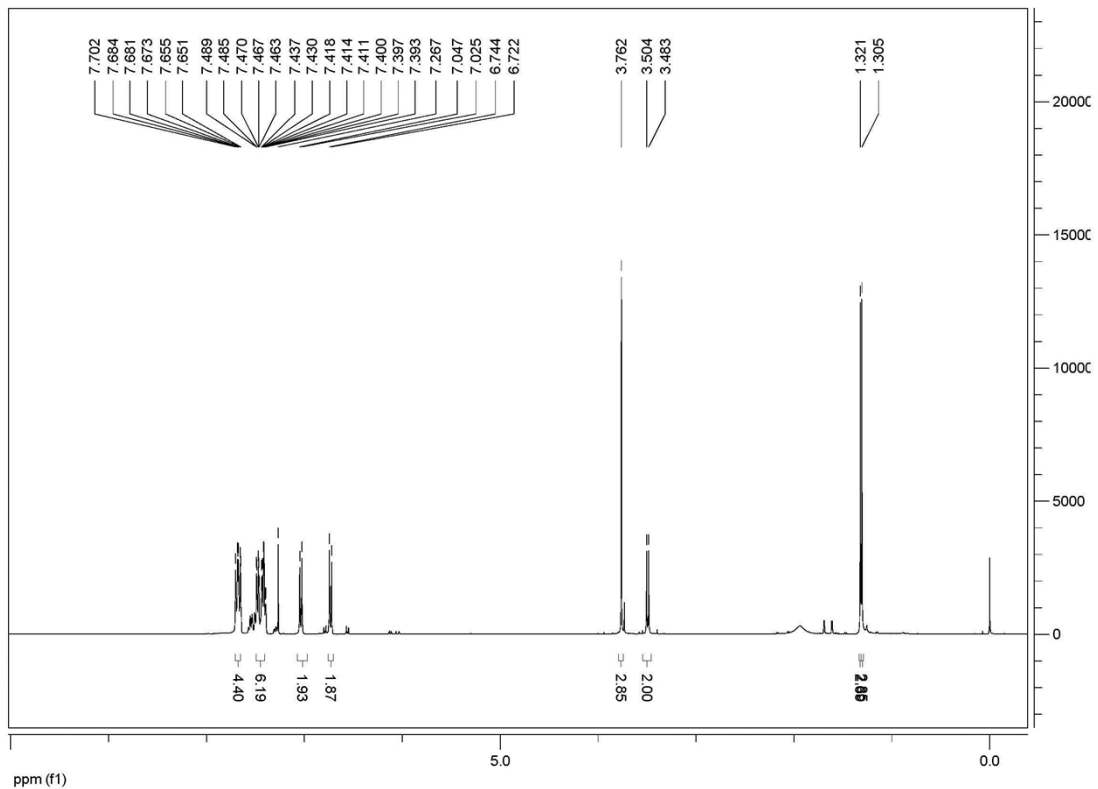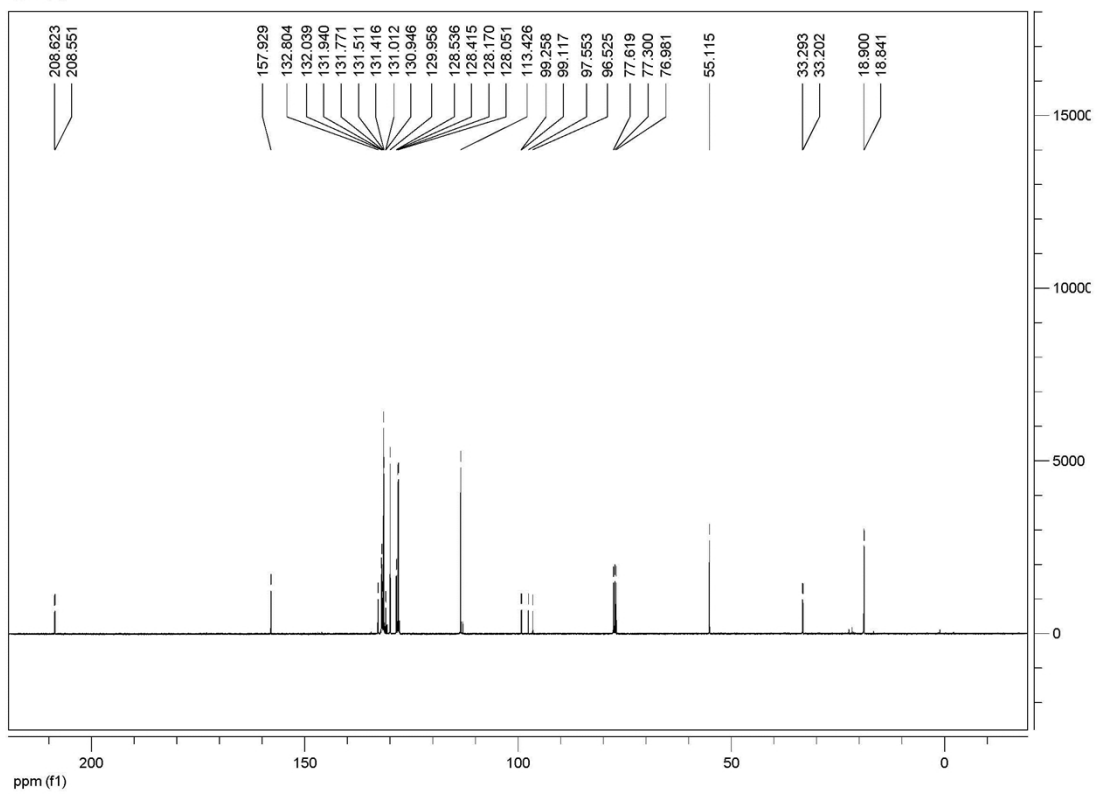

5 #51 RT: 0.44 AV: 1 NL: 4.08E5  
 T: FTMS {1,1} + p ESI Full ms [100.00-1000.00]

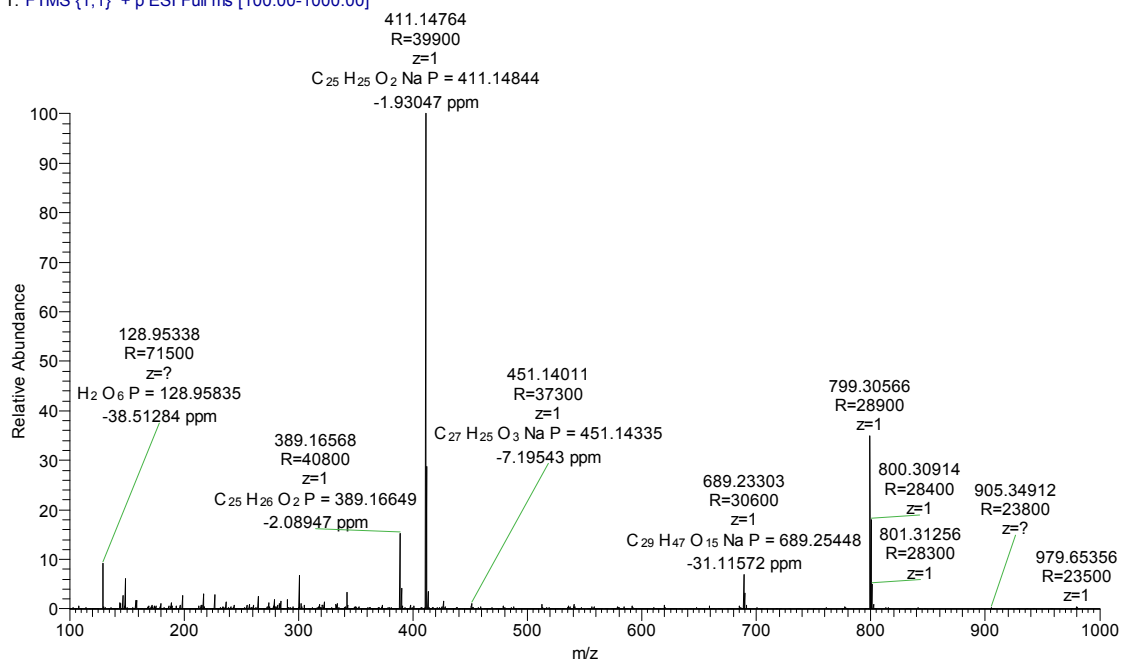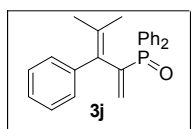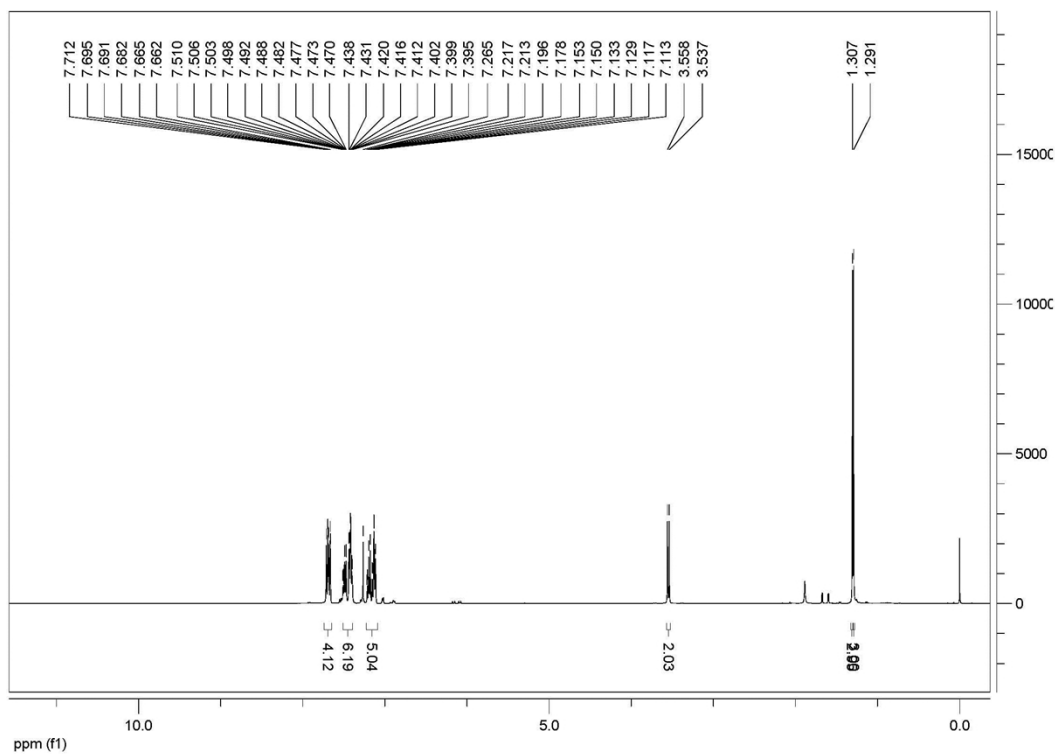



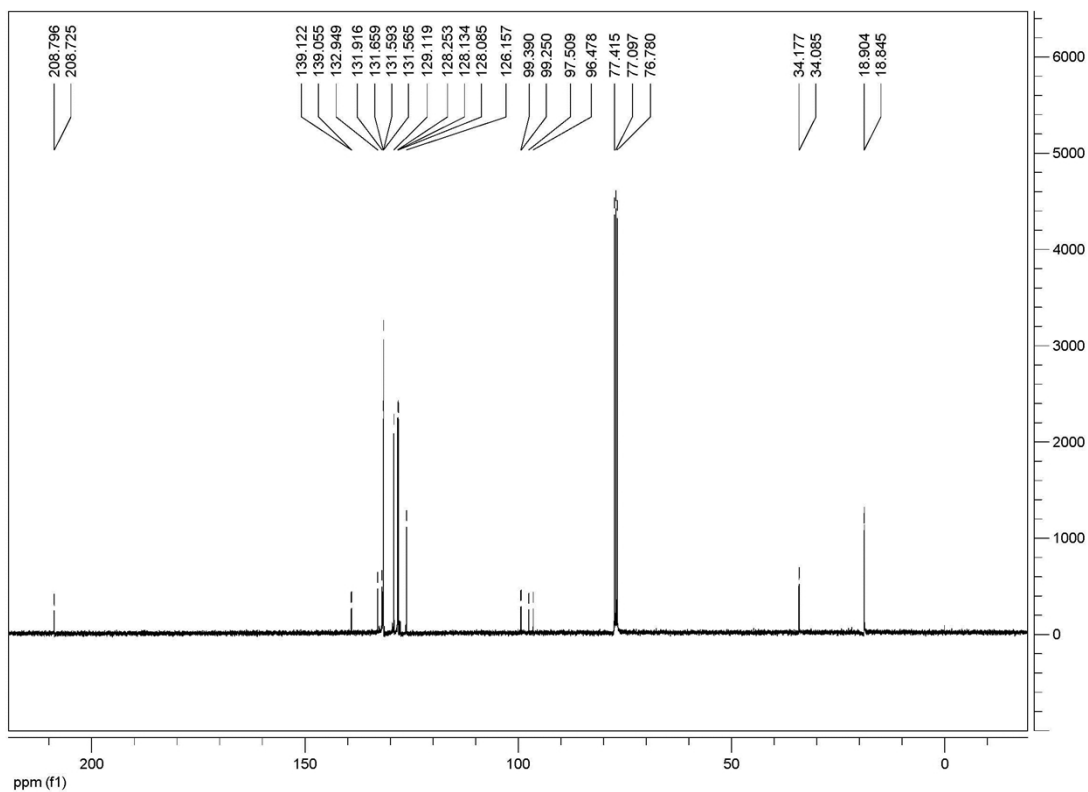

6 #46 RT: 0.38 AV: 1 NL: 1.98E6  
 T: FTMS {1,1} + p ESI Full ms [100.00-1000.00]

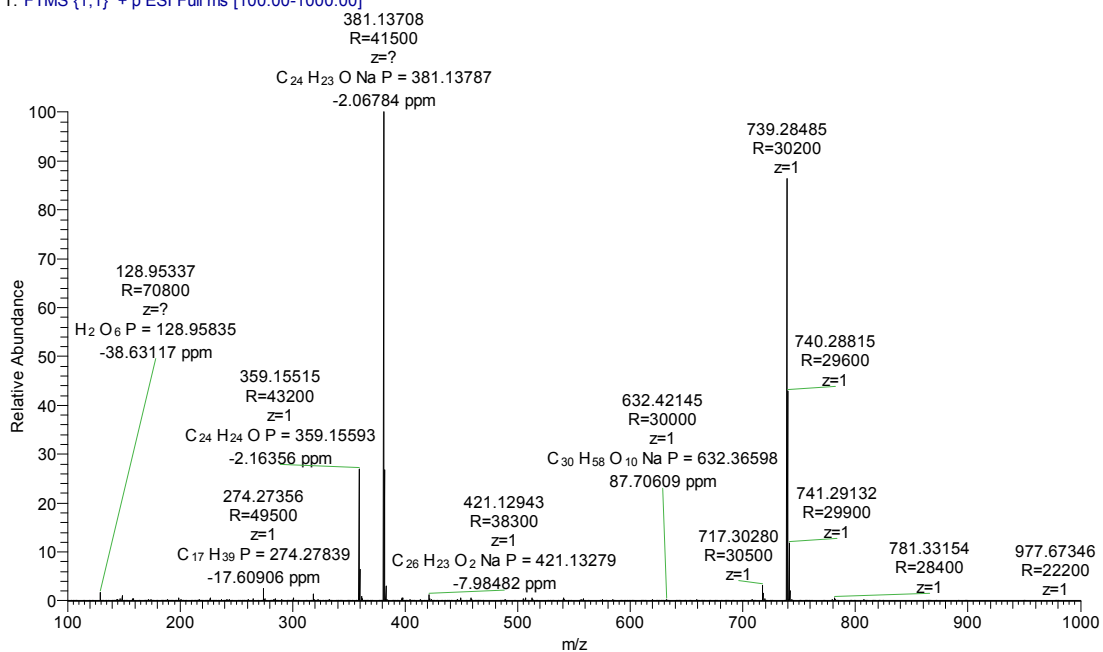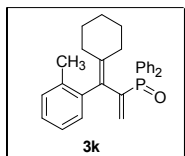

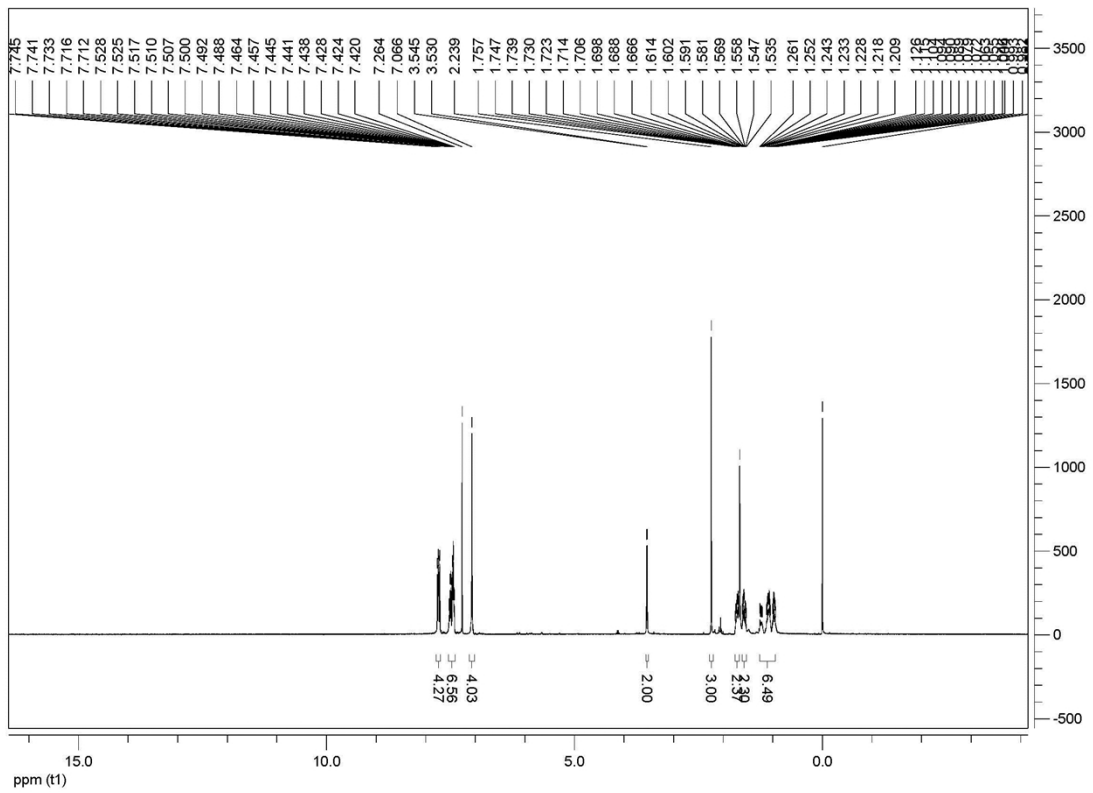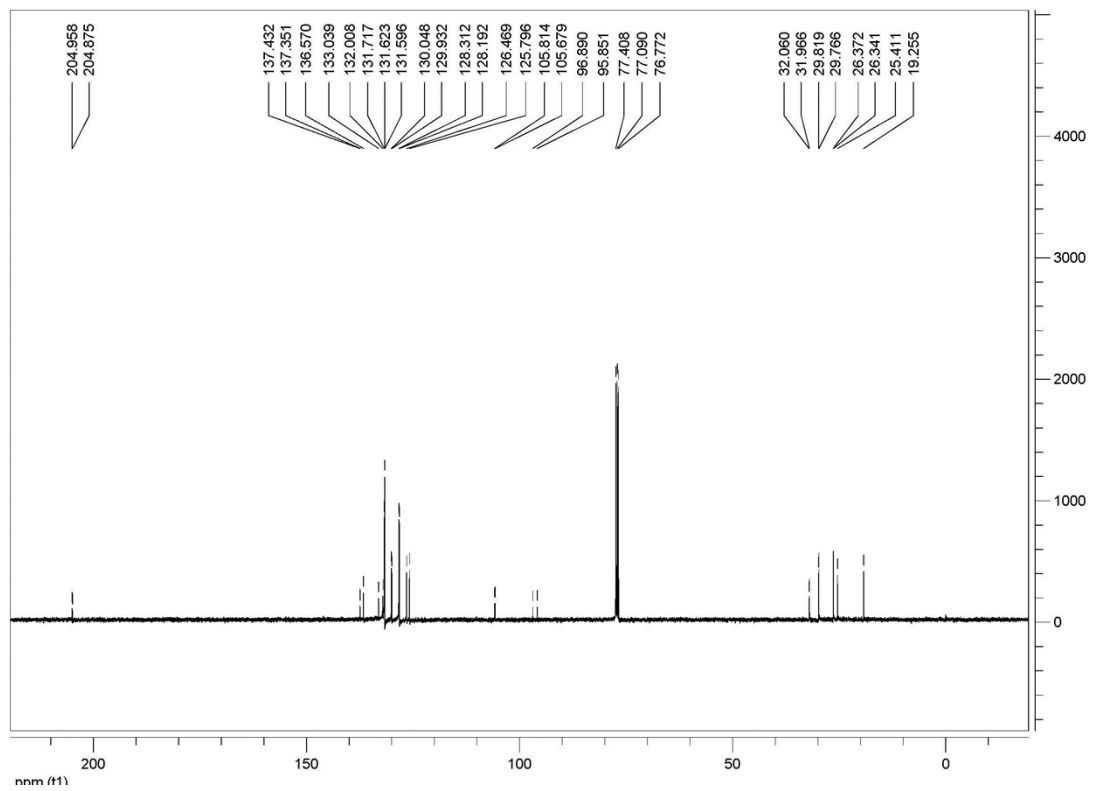

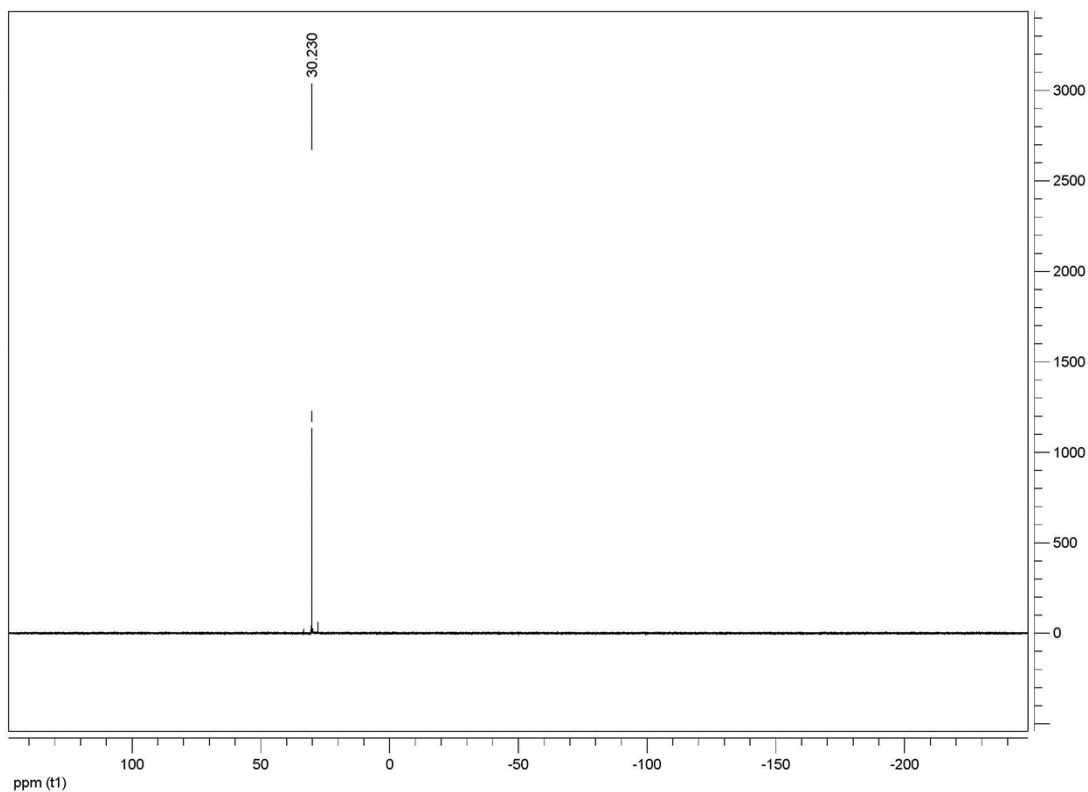

19 #41 RT: 0.36 AV: 1 NL: 6.89E5  
 T: FTMS {1,1} + p ESI Full ms [100.00-1000.00]

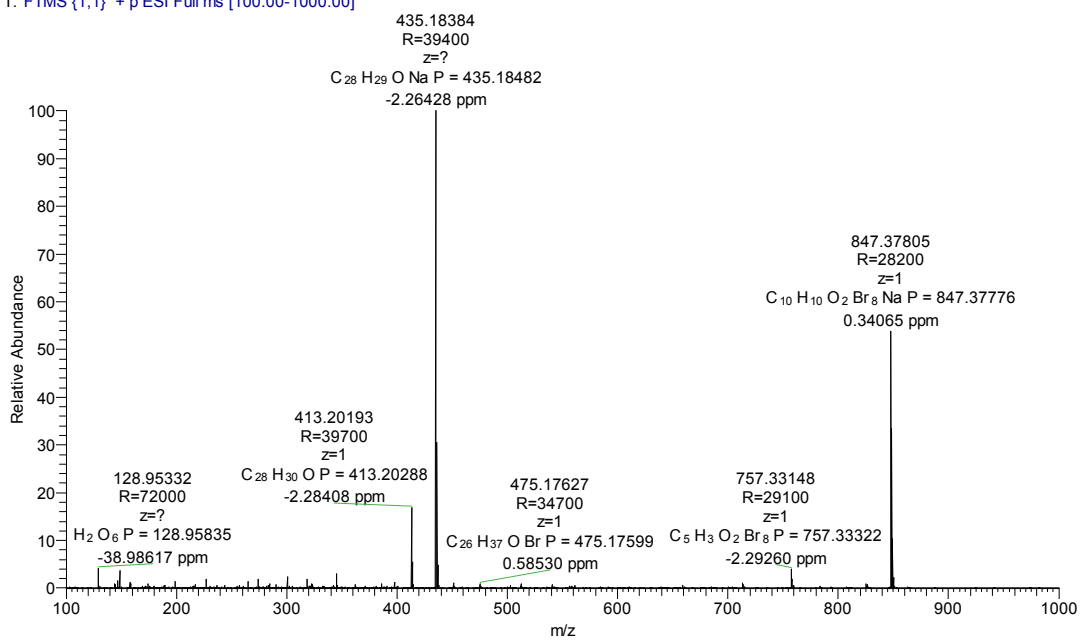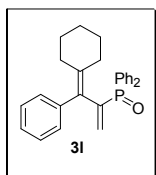

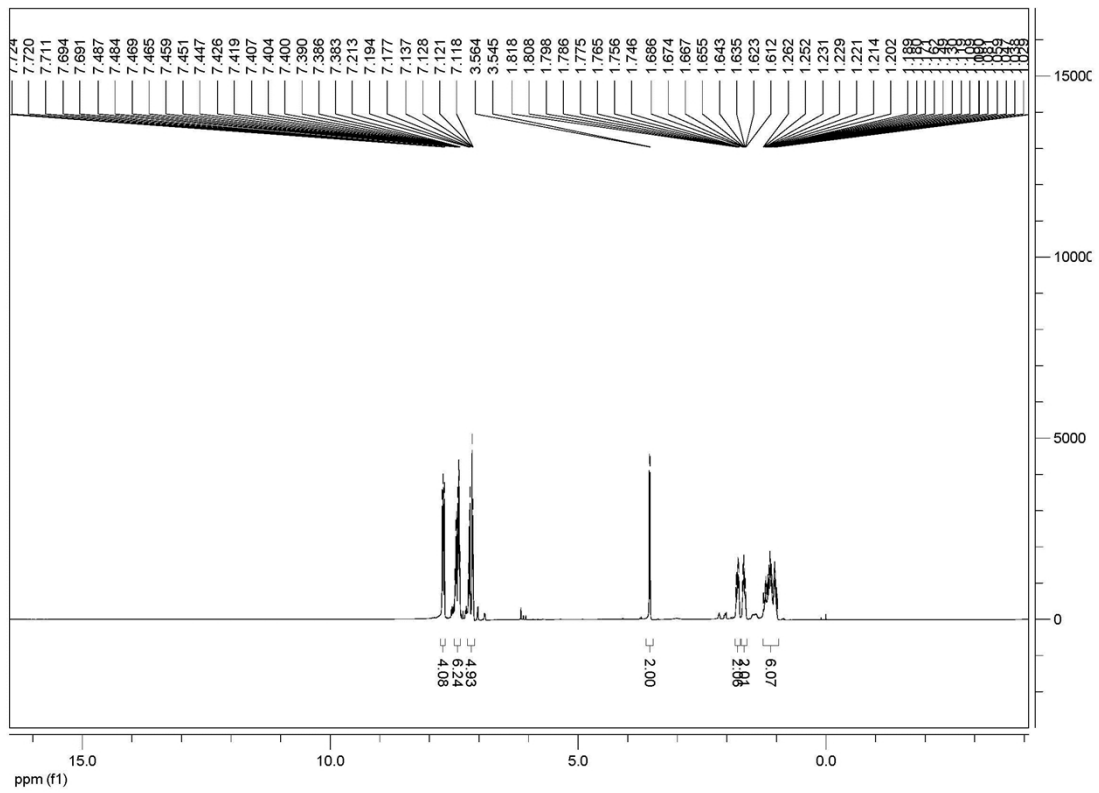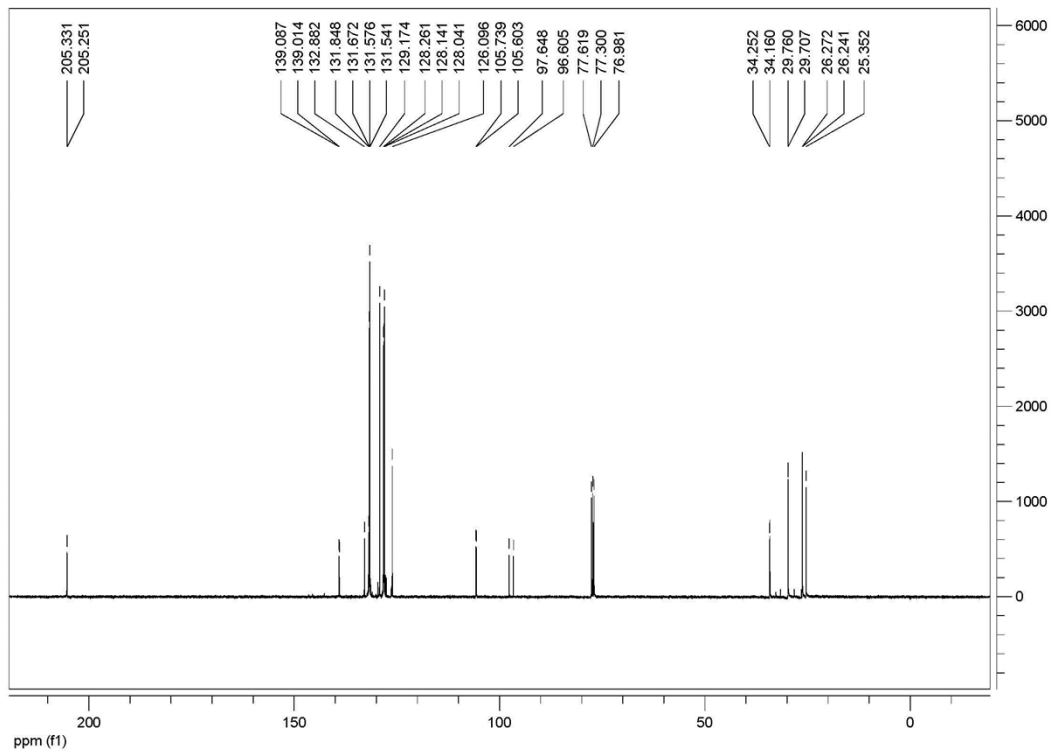

WL-3 #45-49 RT: 0.38-0.43 AV: 5 NL: 6.87E5  
 T: FTMS (1,1) + p ESI Full ms [100.00-1000.00]

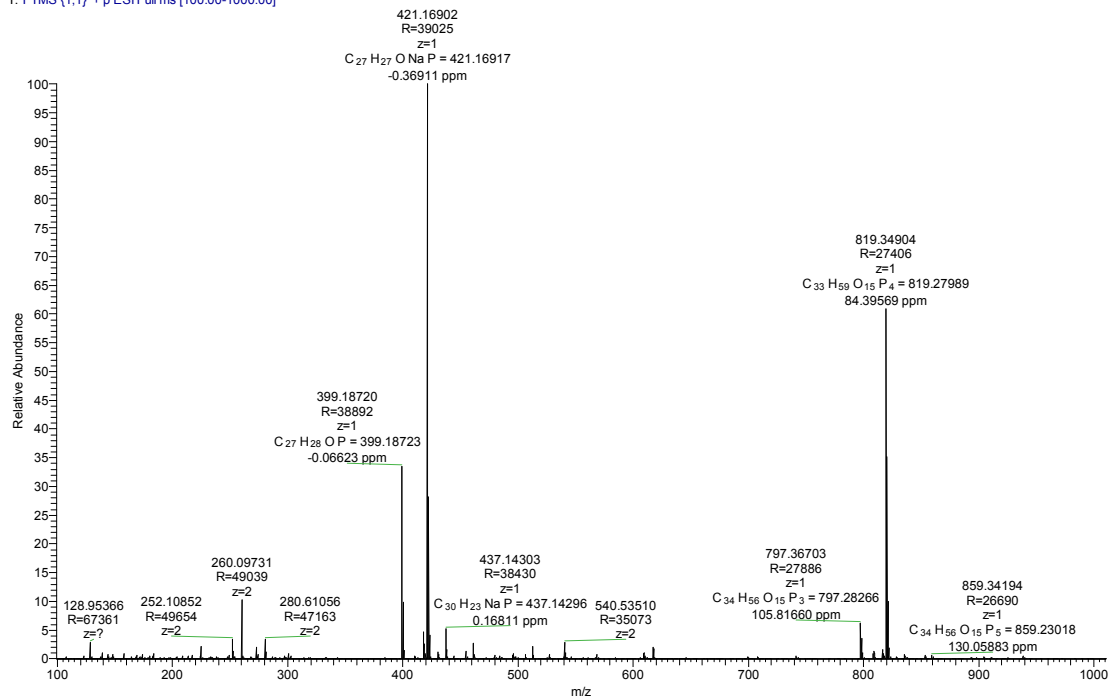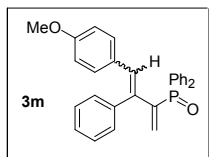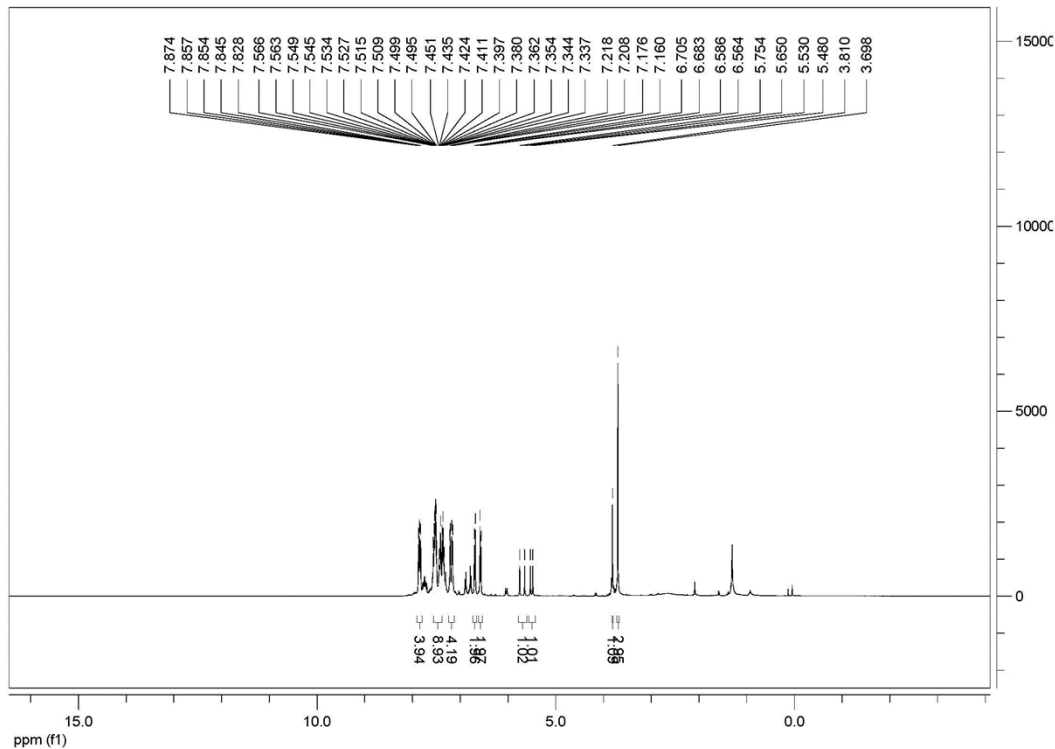

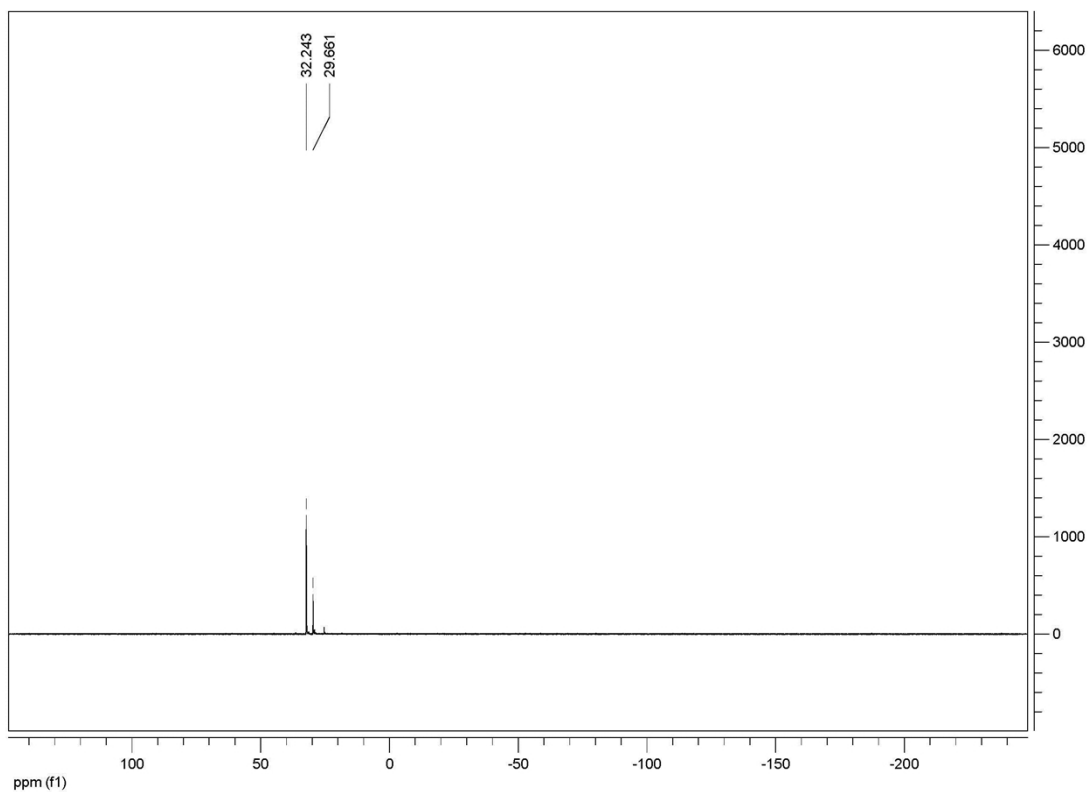

23 #45-47 RT: 0.39-0.42 AV: 3 NL: 2.68E5  
 T: FTMS {1,1} + p ESI Full ms [100.00-1000.00]

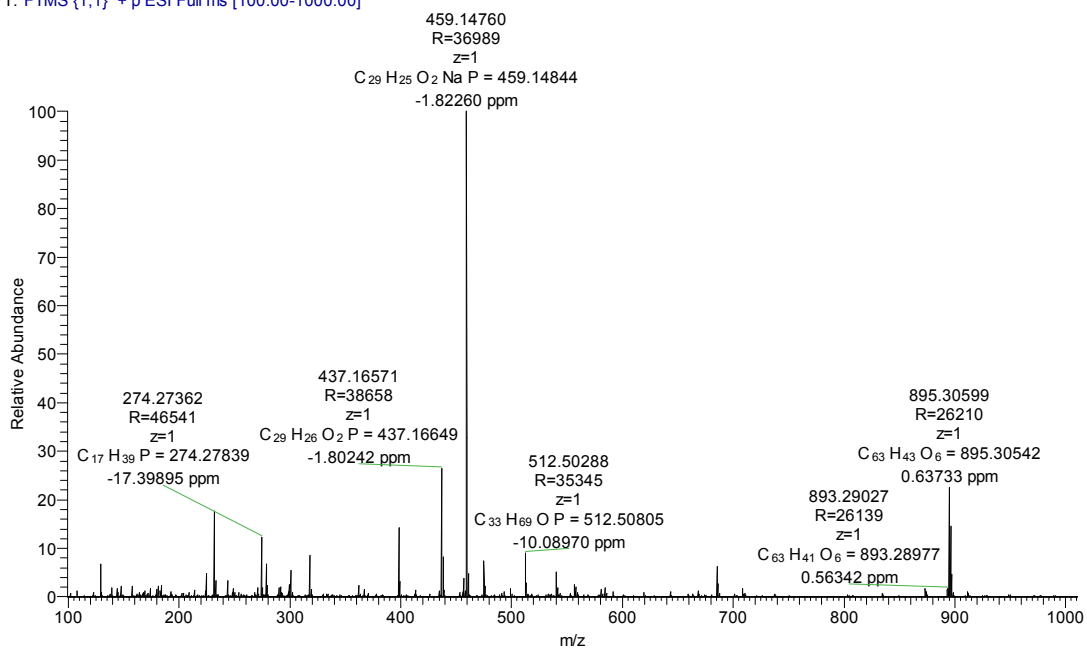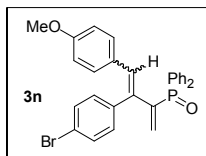



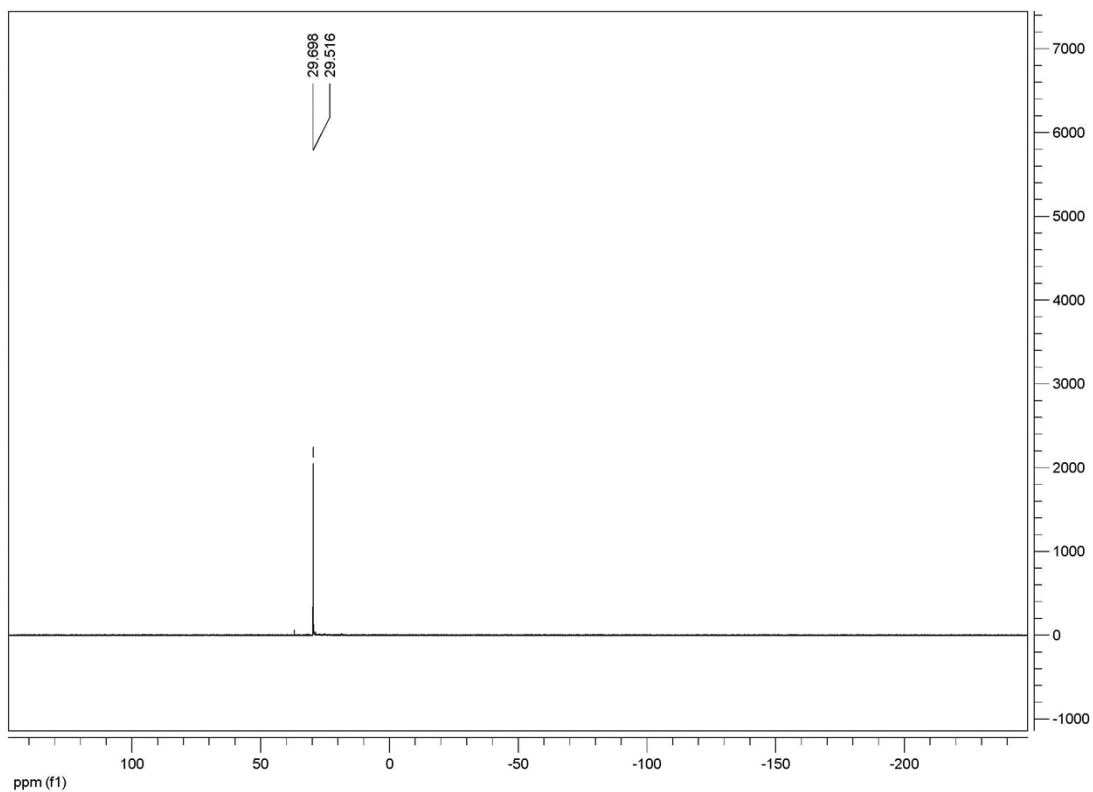

24 #53-56 RT: 0.45-0.48 AV: 4 NL: 2.52E5  
T: FTMS {1,1} + p ESI Full ms [100.00-1000.00]

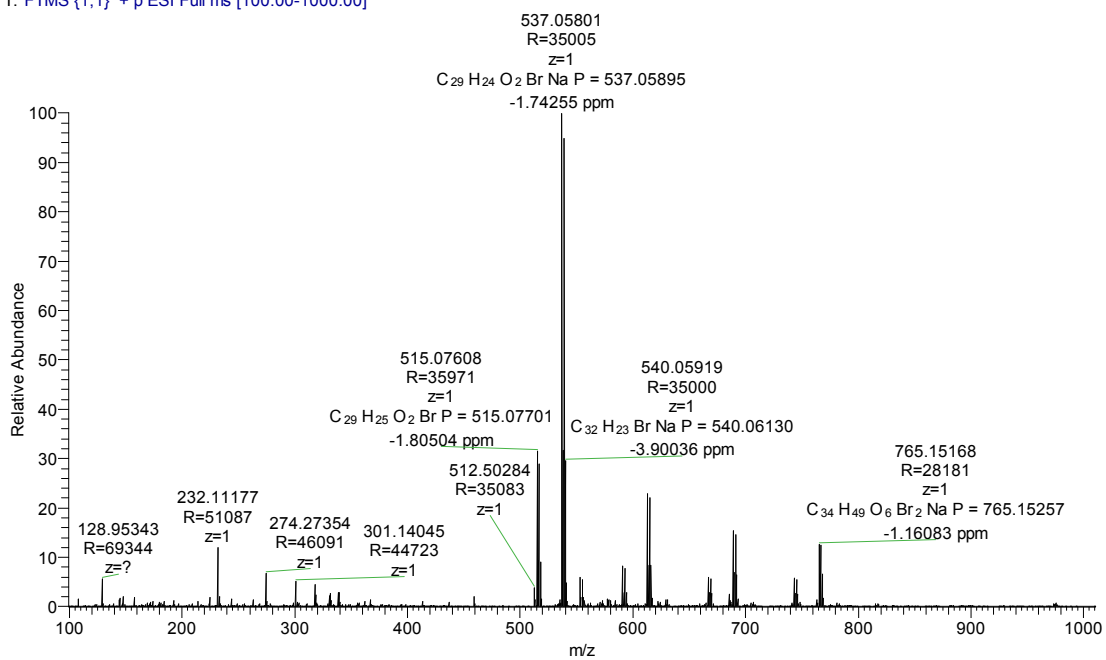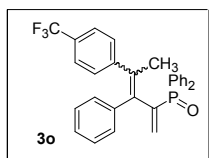





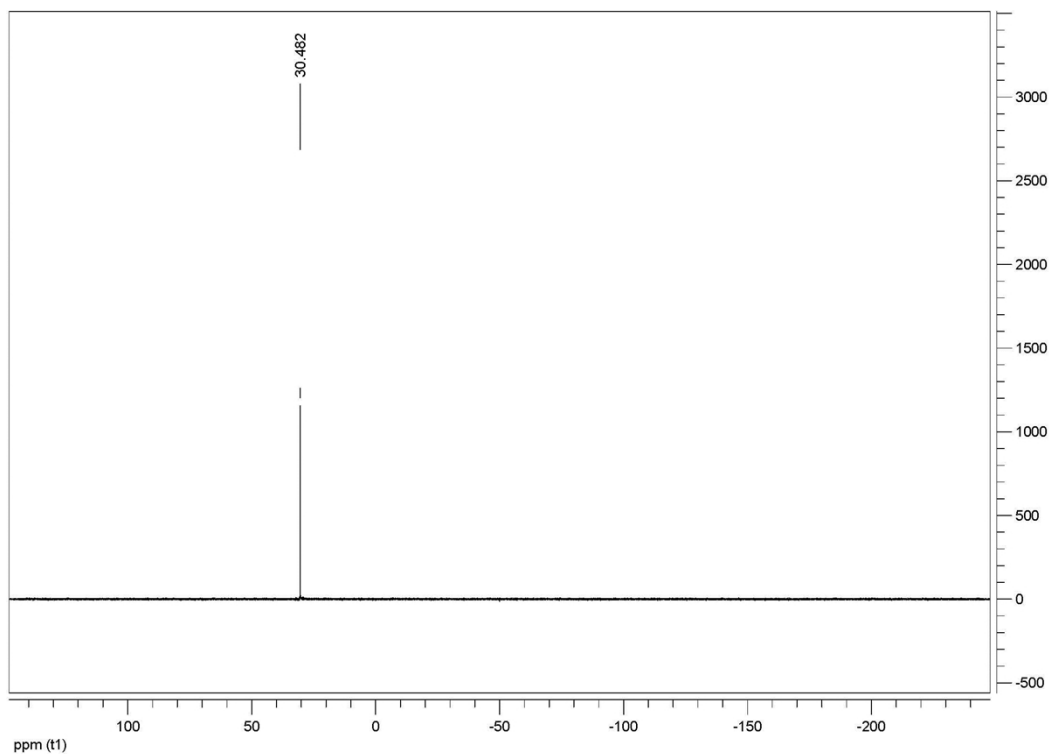

7 #42-43 RT: 0.37-0.39 AV: 2 NL: 6.00E5  
 T: FTMS (1,1) + p ESI Full ms [100.00-1000.00]

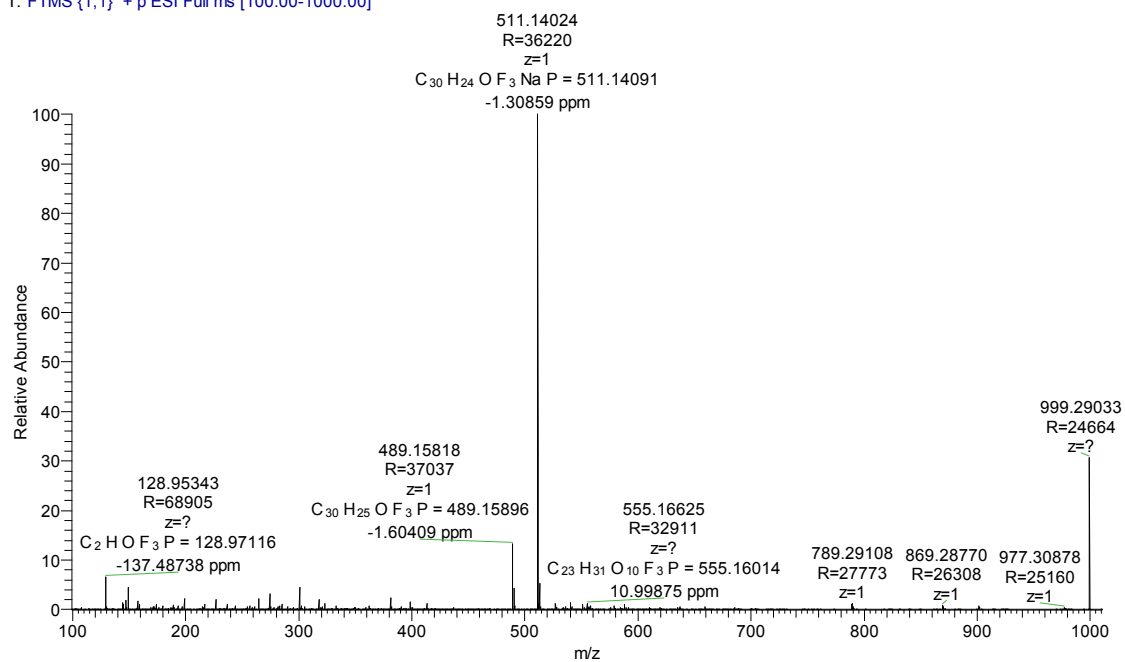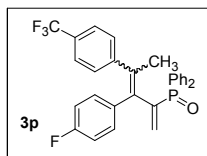

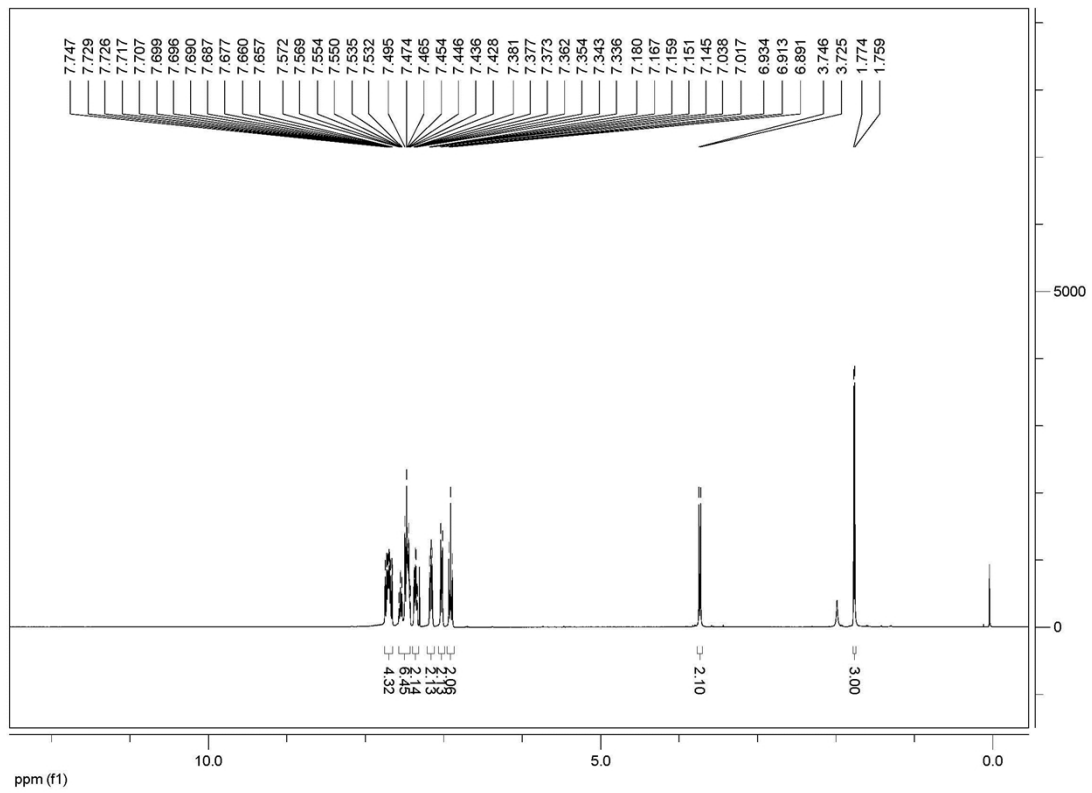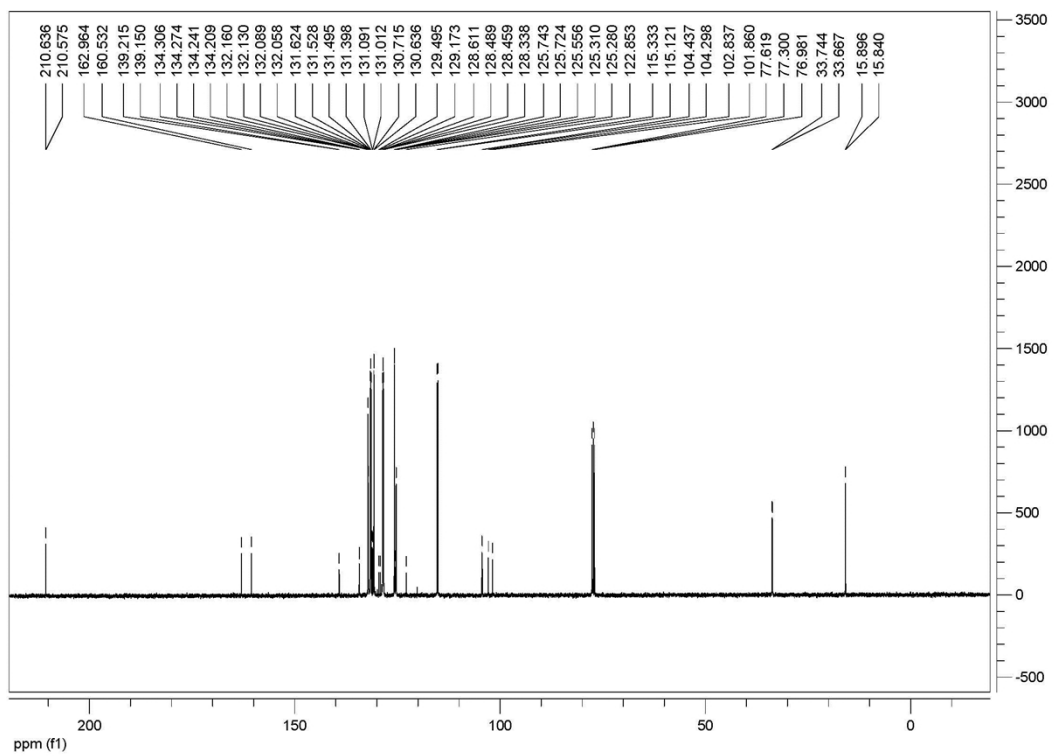

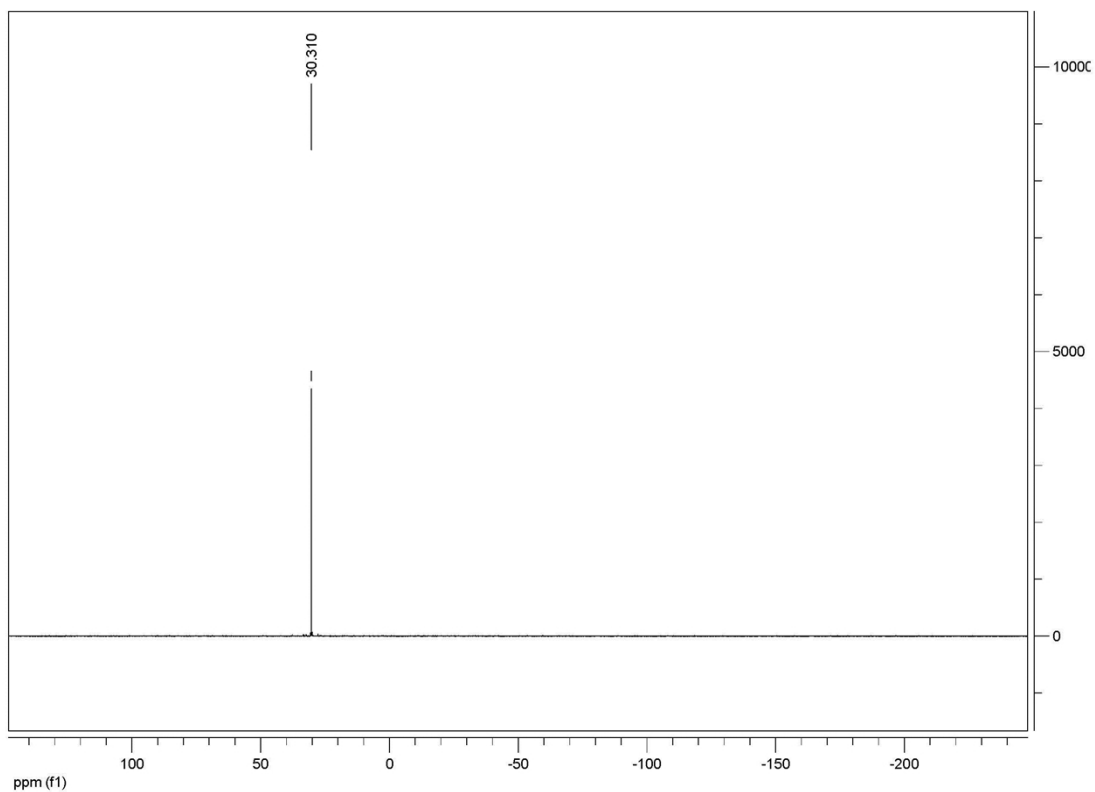

8 #49 RT: 0.41 AV: 1 NL: 7.83E5  
 T: FTMS (1,1) + p ESI Full ms [100.00-1000.00]

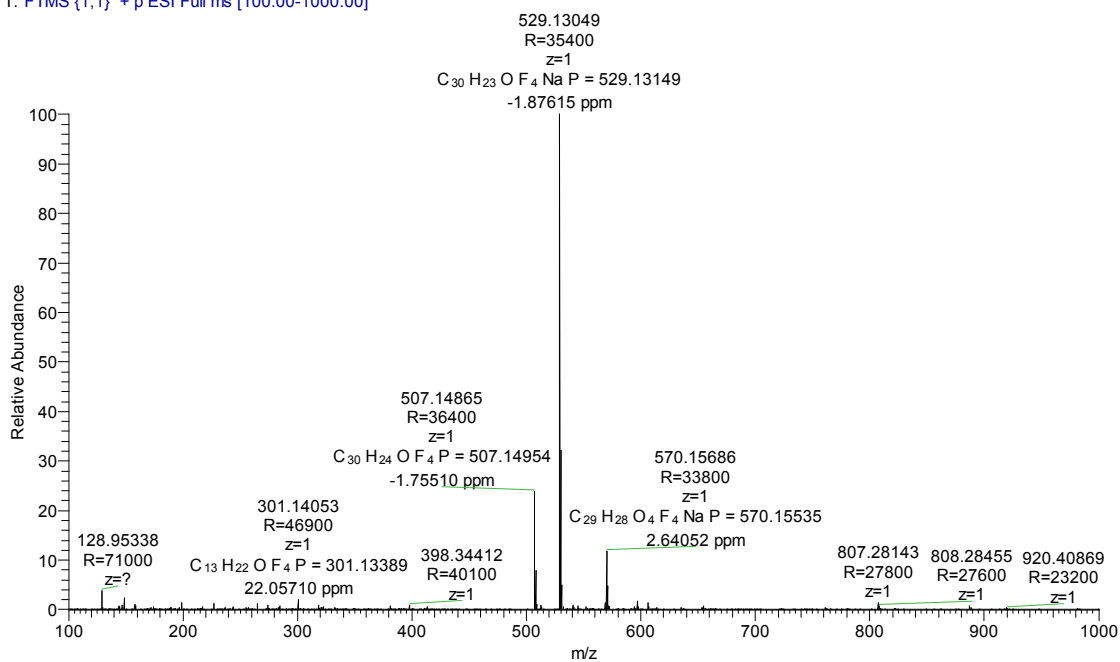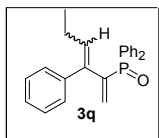

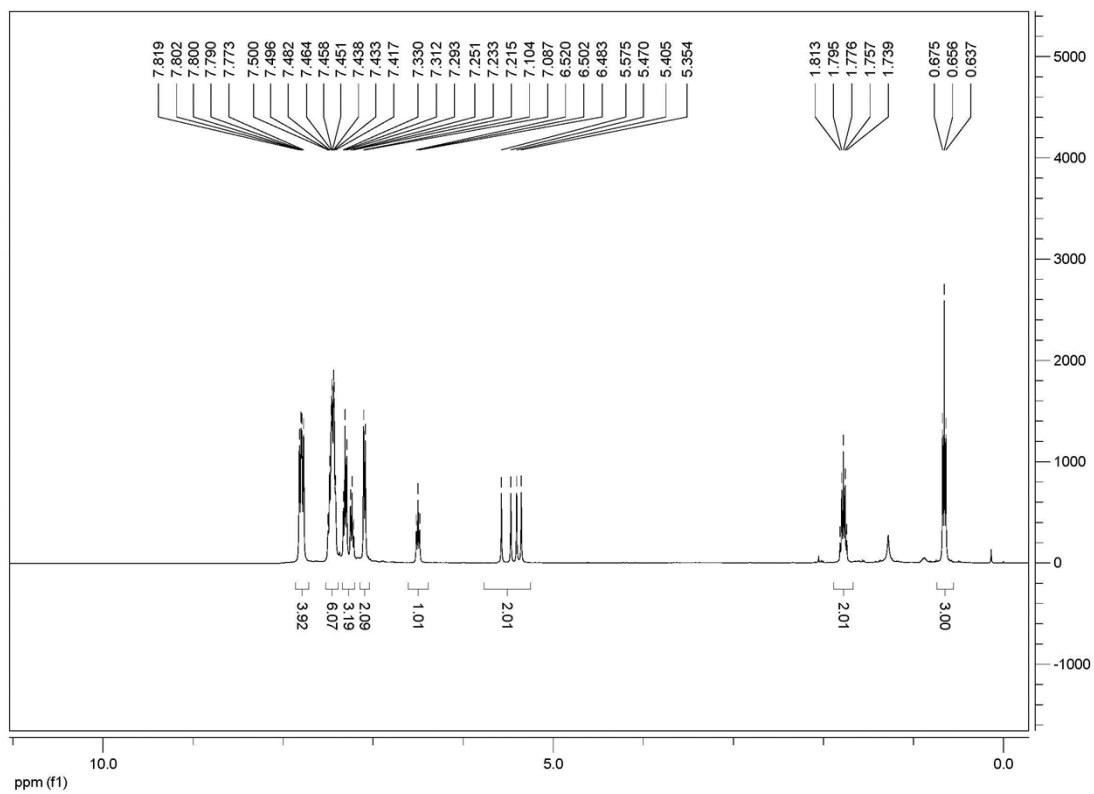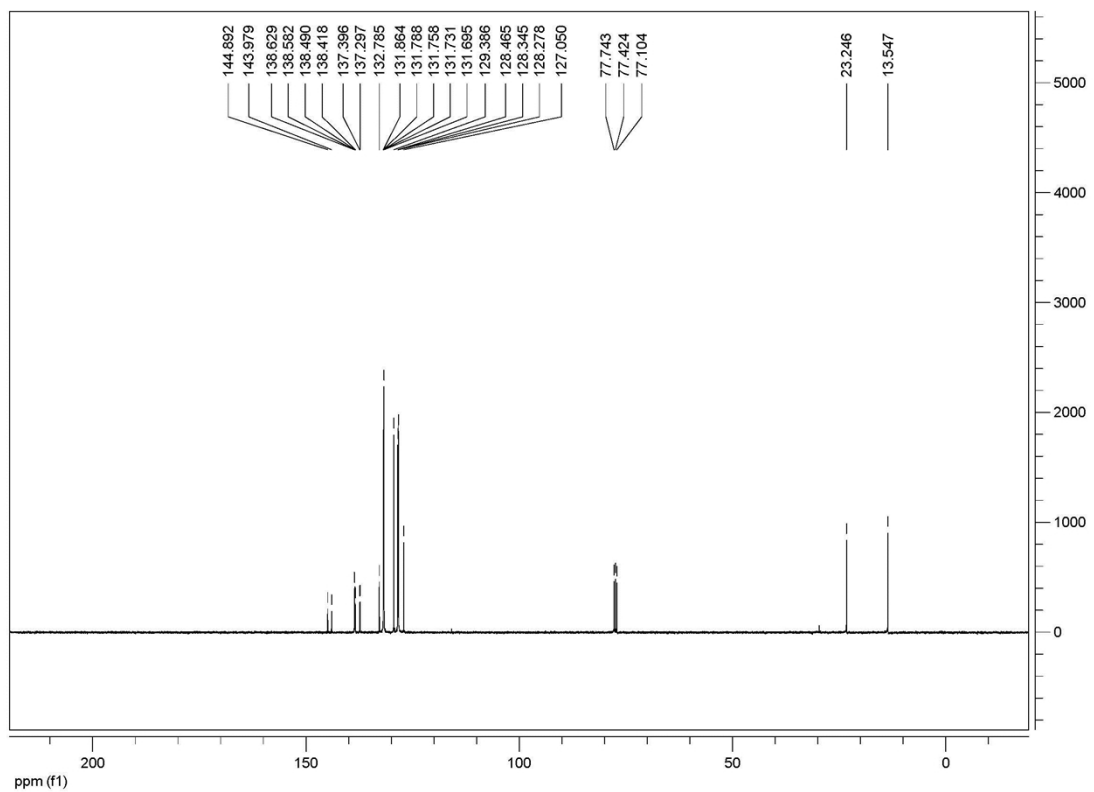

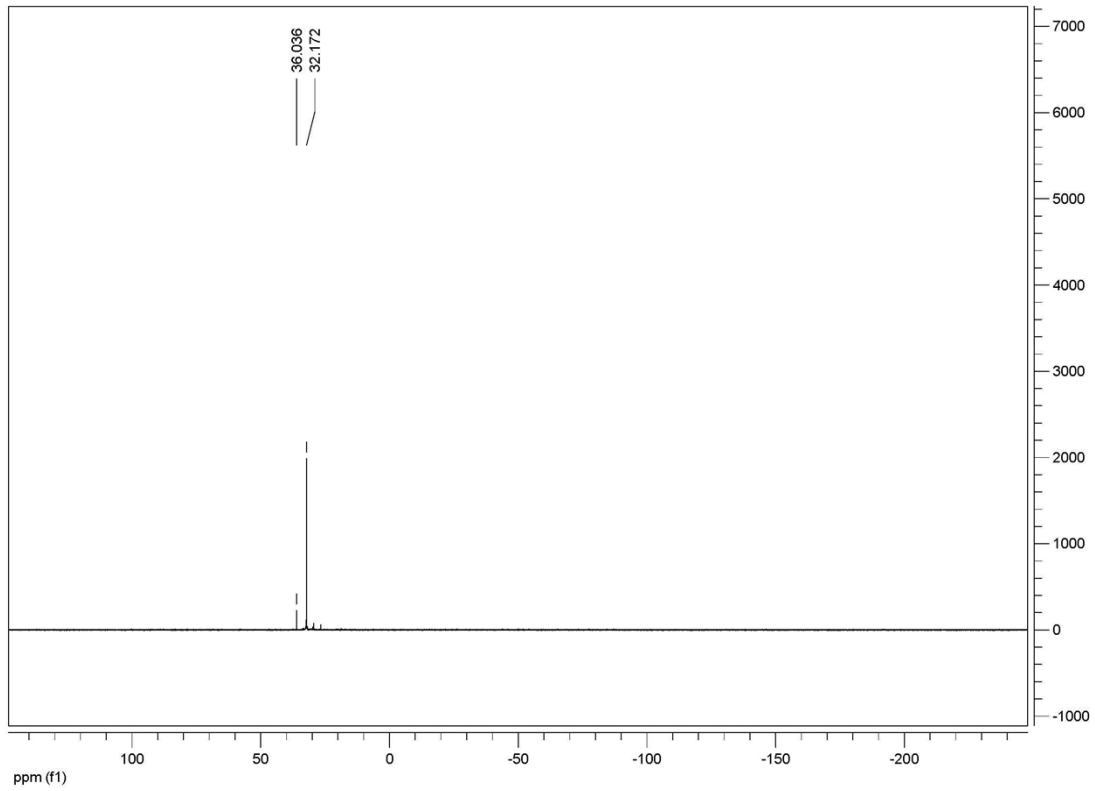

9 #48-50 RT: 0.40-0.42 AV: 3 NL: 1.40E6  
 T: FTMS (1,1) + p ESI Full ms [100.00-1000.00]

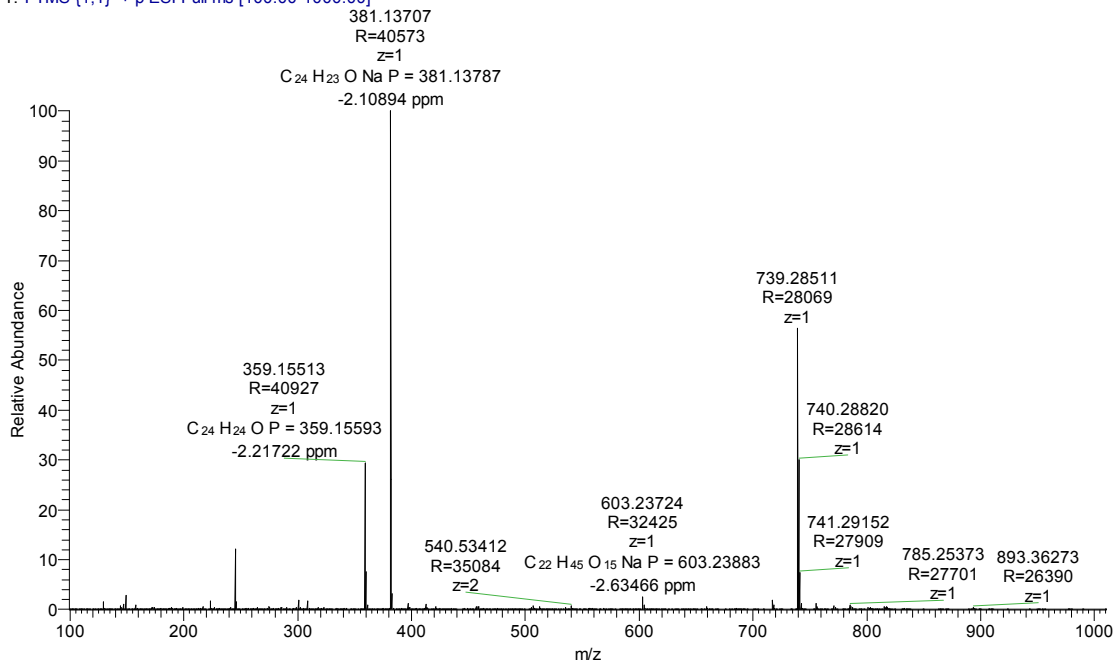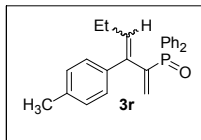

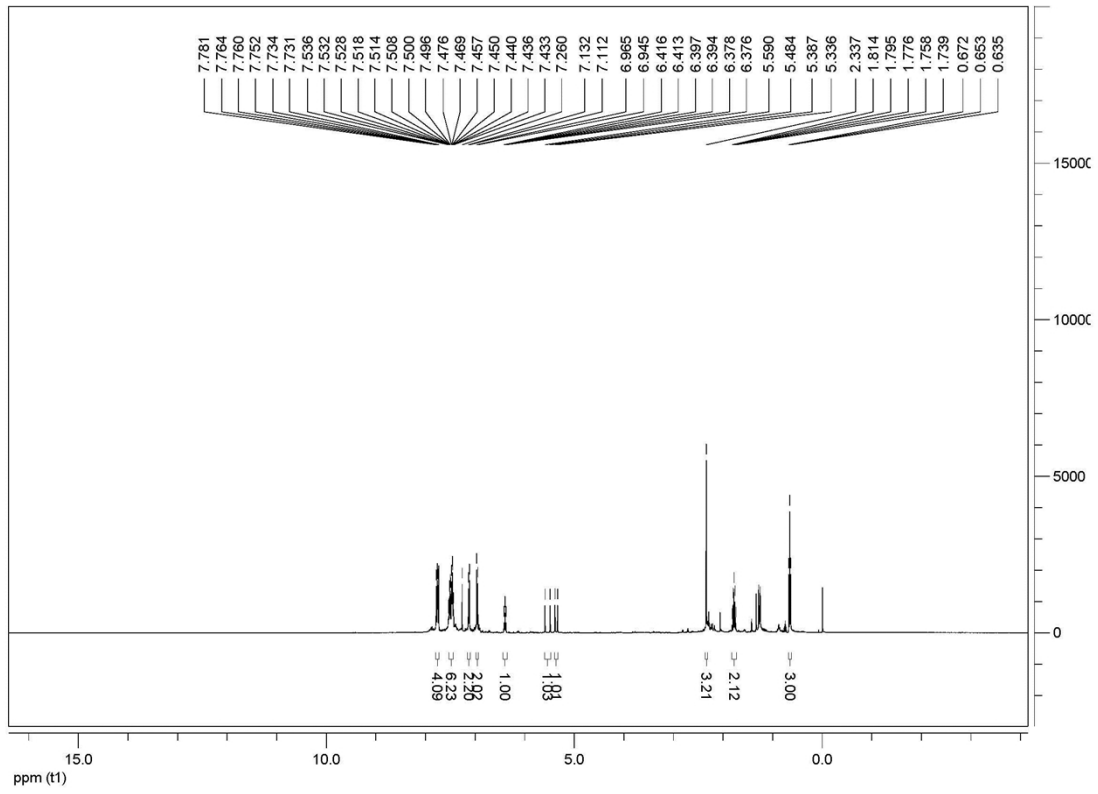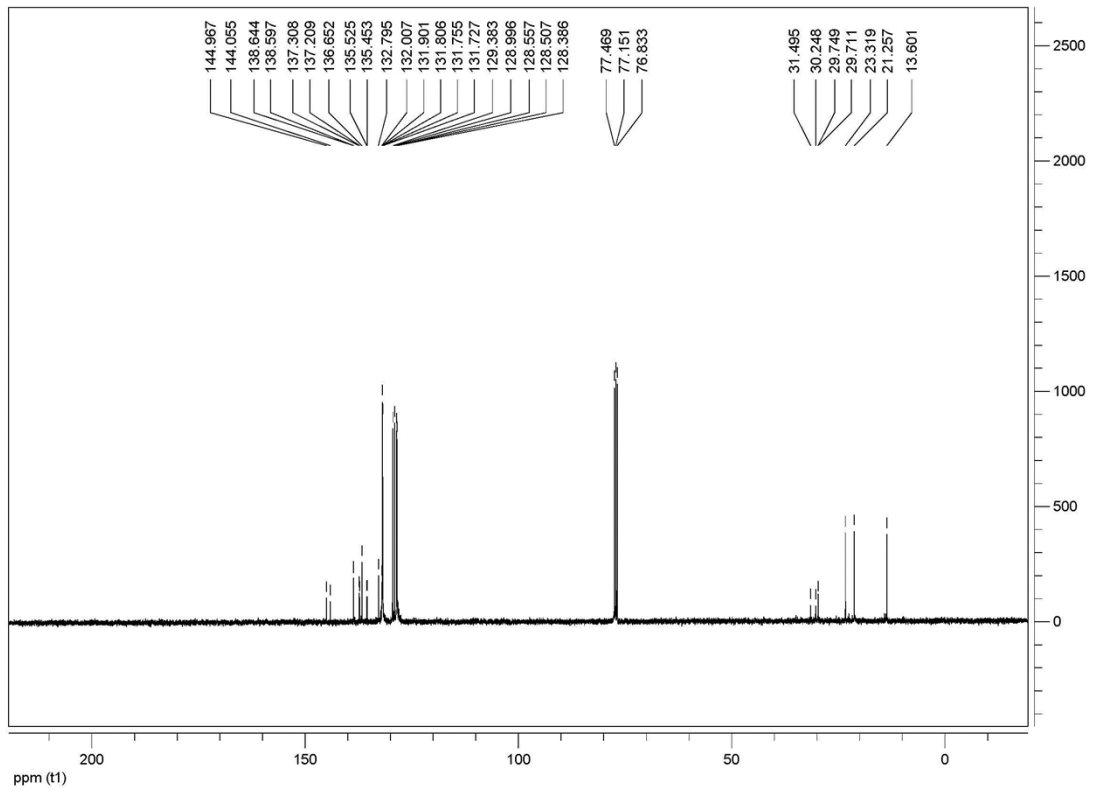

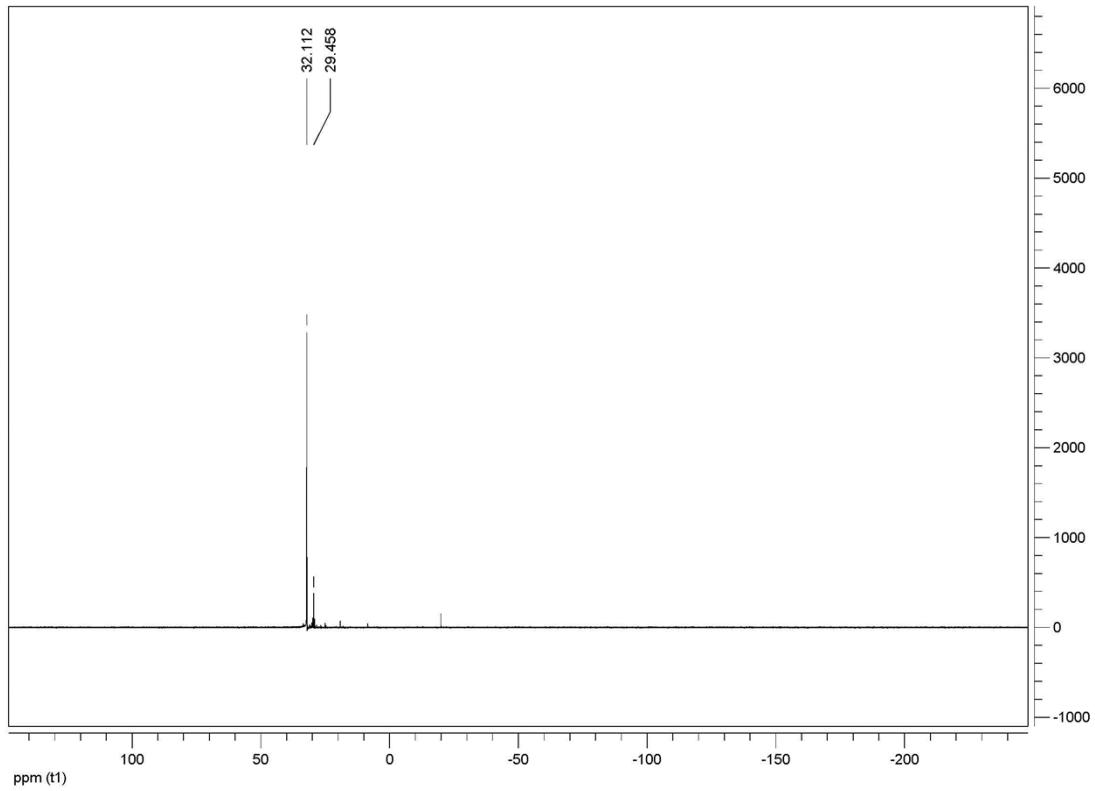

2 #55 RT: 0.51 AV: 1 NL: 2.28E5  
 T: FTMS {1,1} + p ESI Full ms [100.00-1000.00]

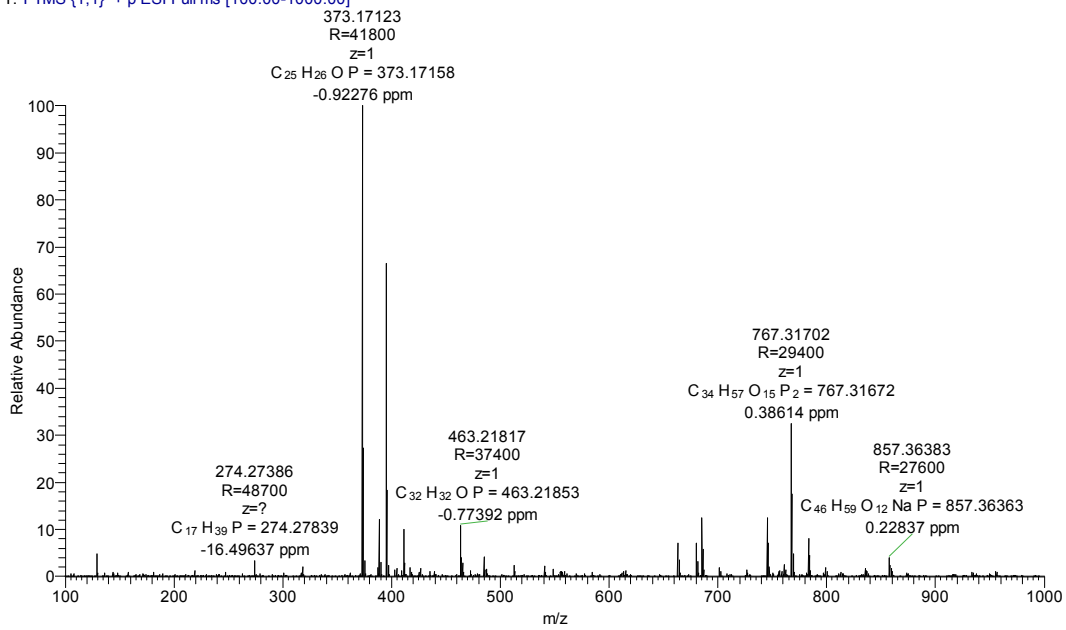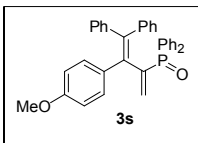



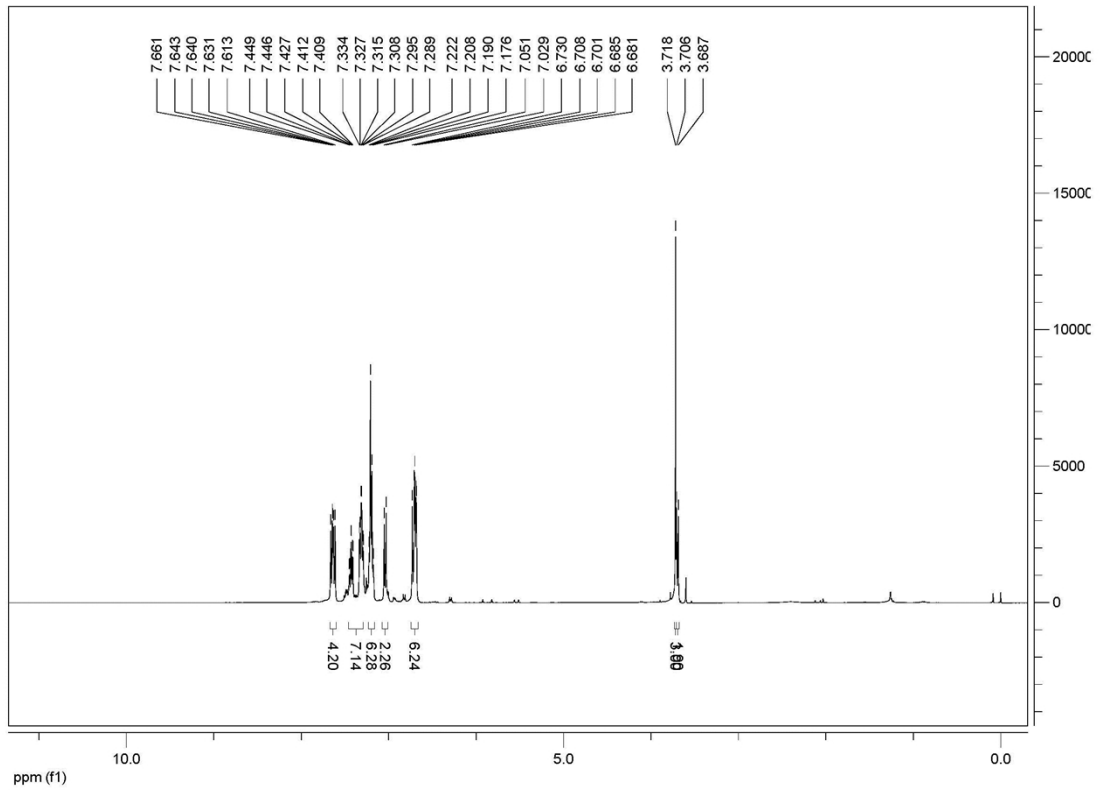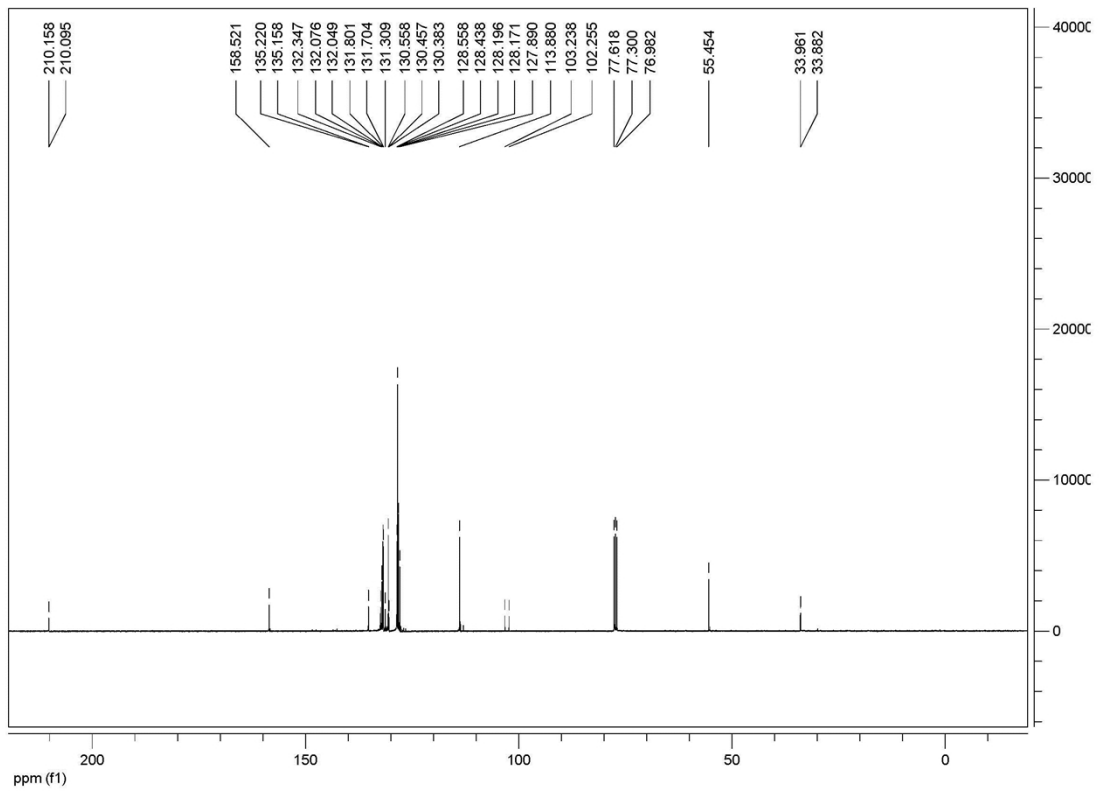

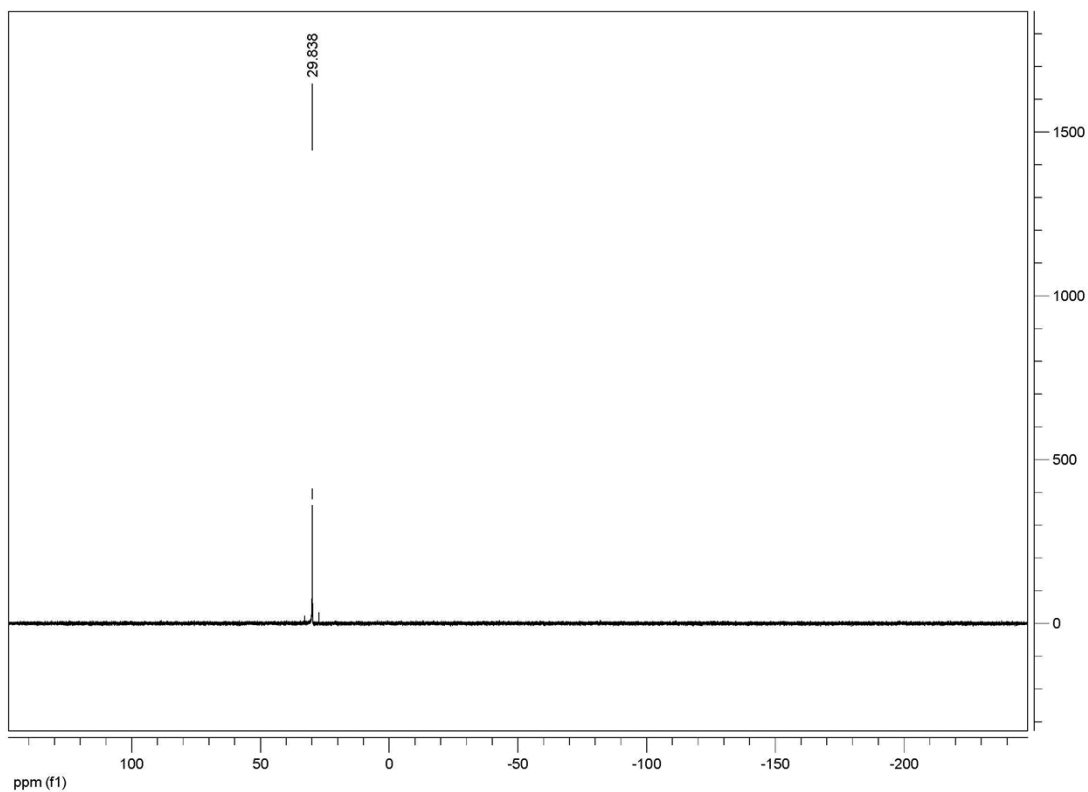

WL-4 #42-43 RT: 0.38-0.39 AV: 2 NL: 4.55E5  
 T: FTMS (1,1) + p ESI Full ms [100.00-1000.00]

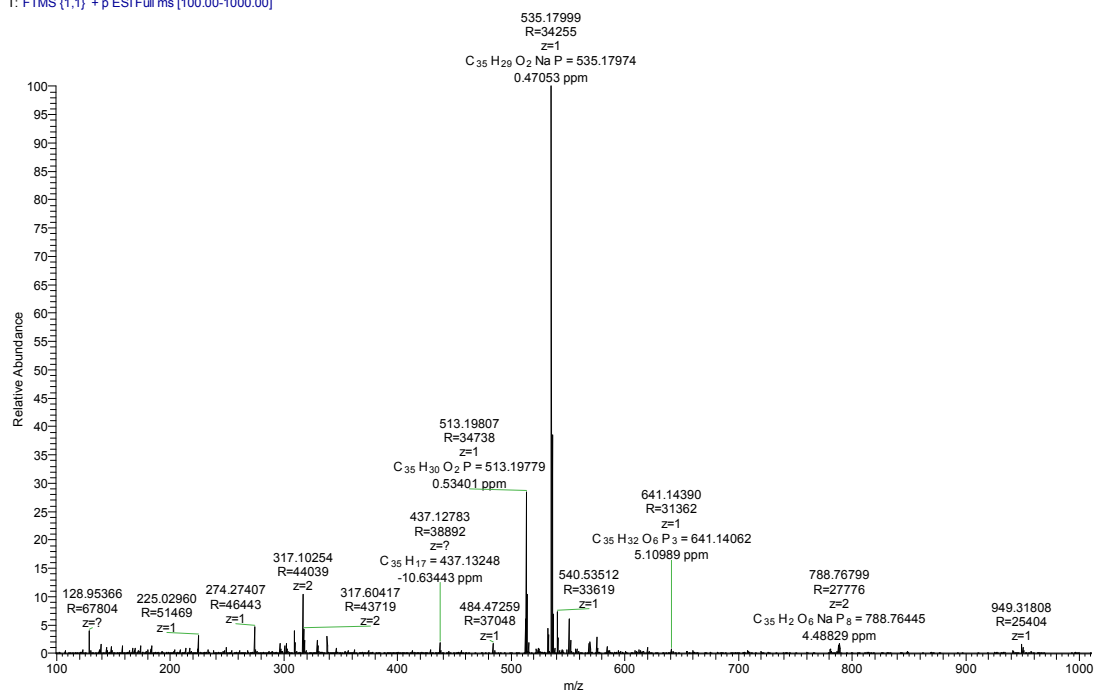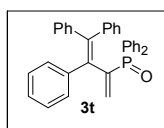

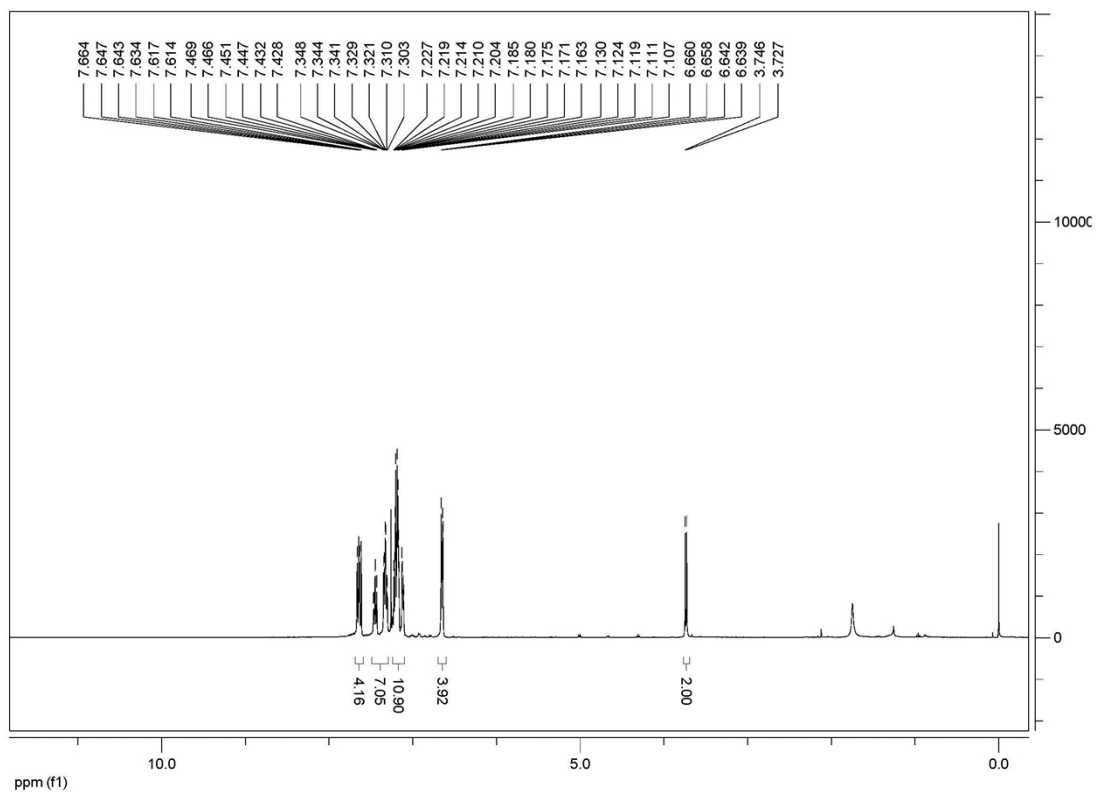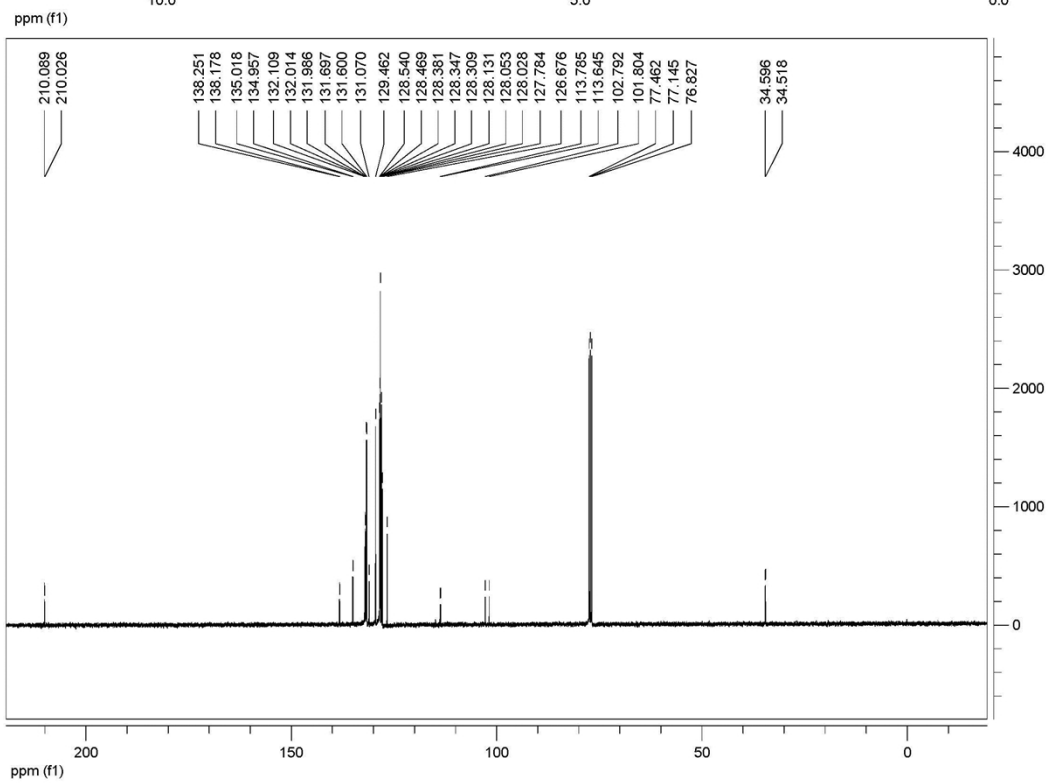

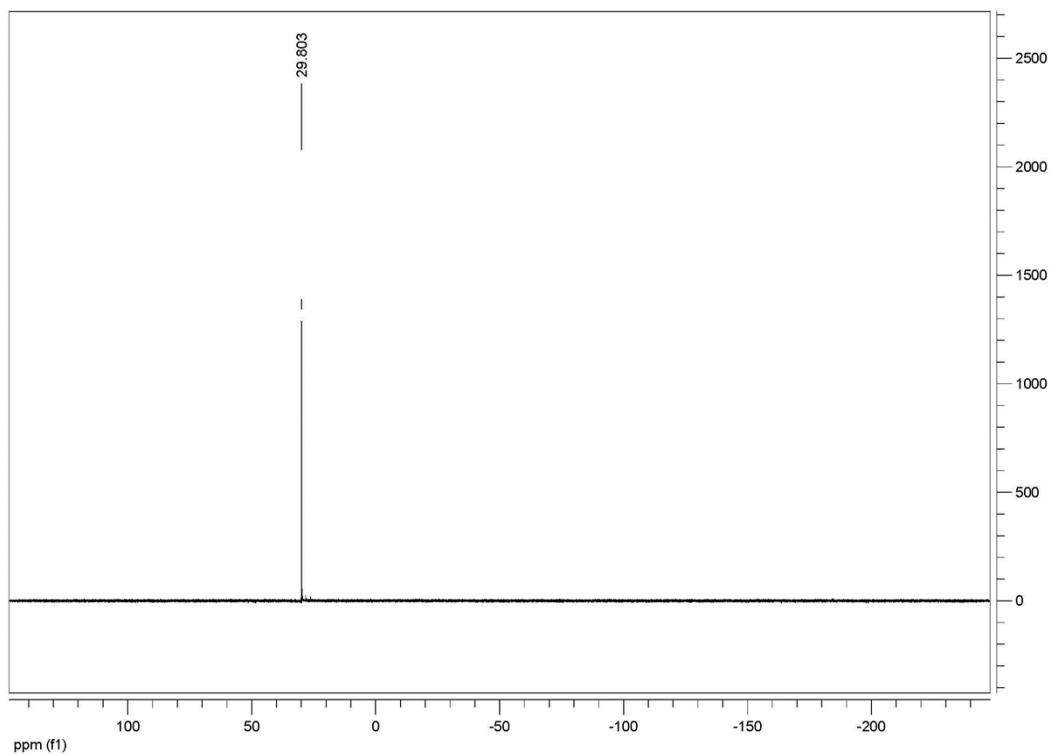

WL-1 #47-48 RT: 0.41-0.42 AV: 2 NL: 4.54E5  
 T: FTMS (1,1) + p ESIFull ms [100.00-1000.00]

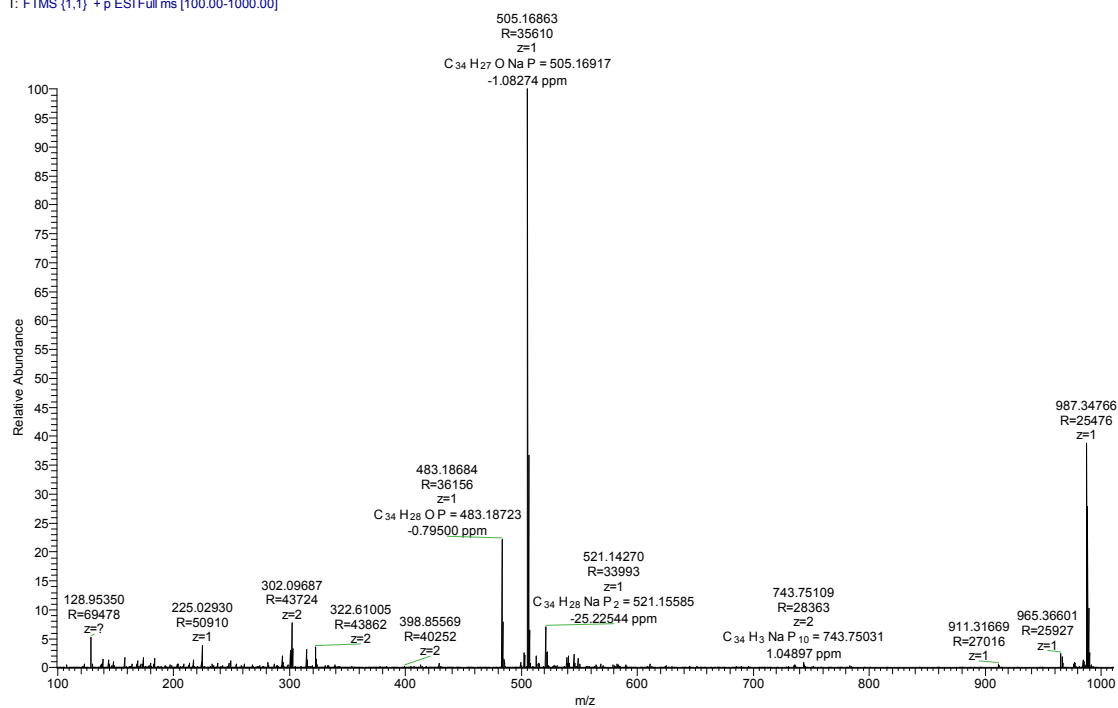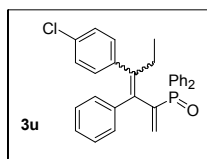

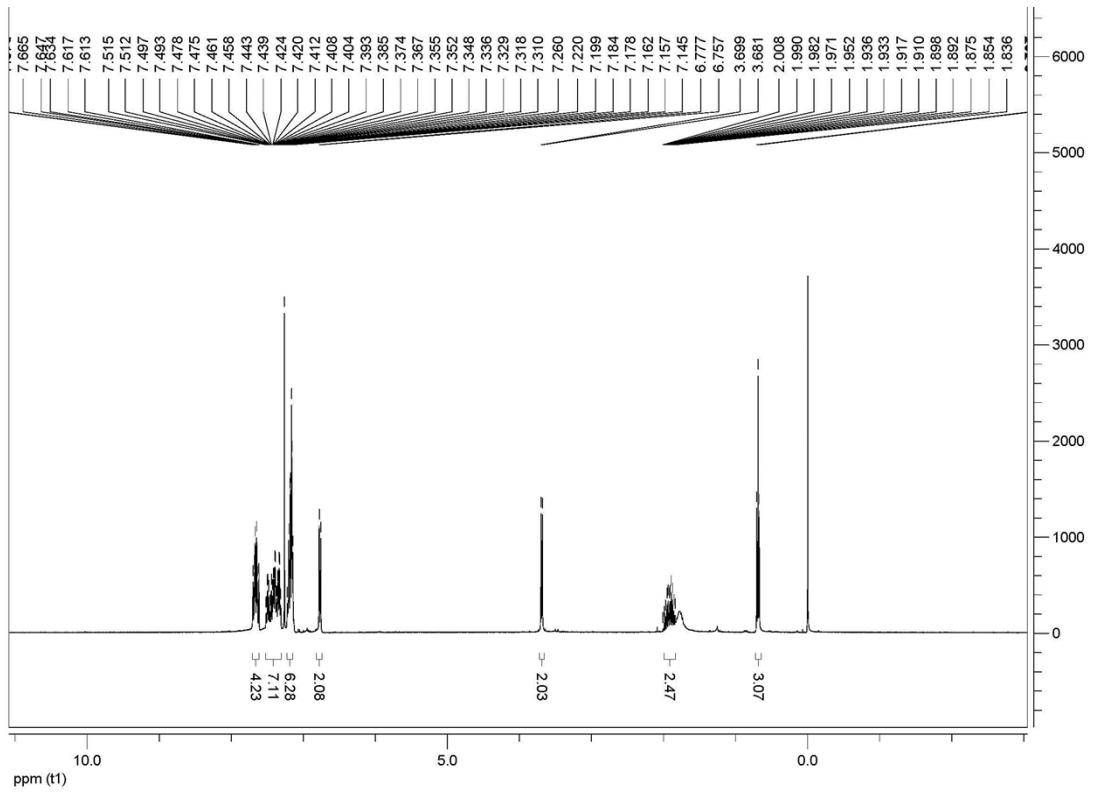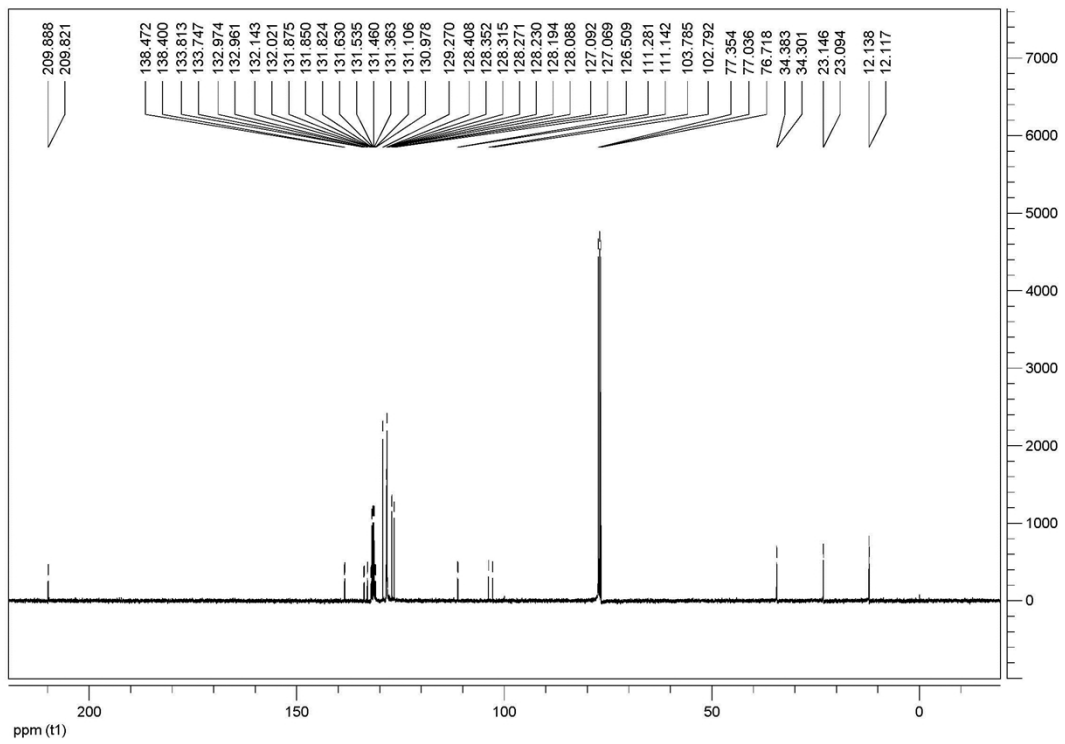

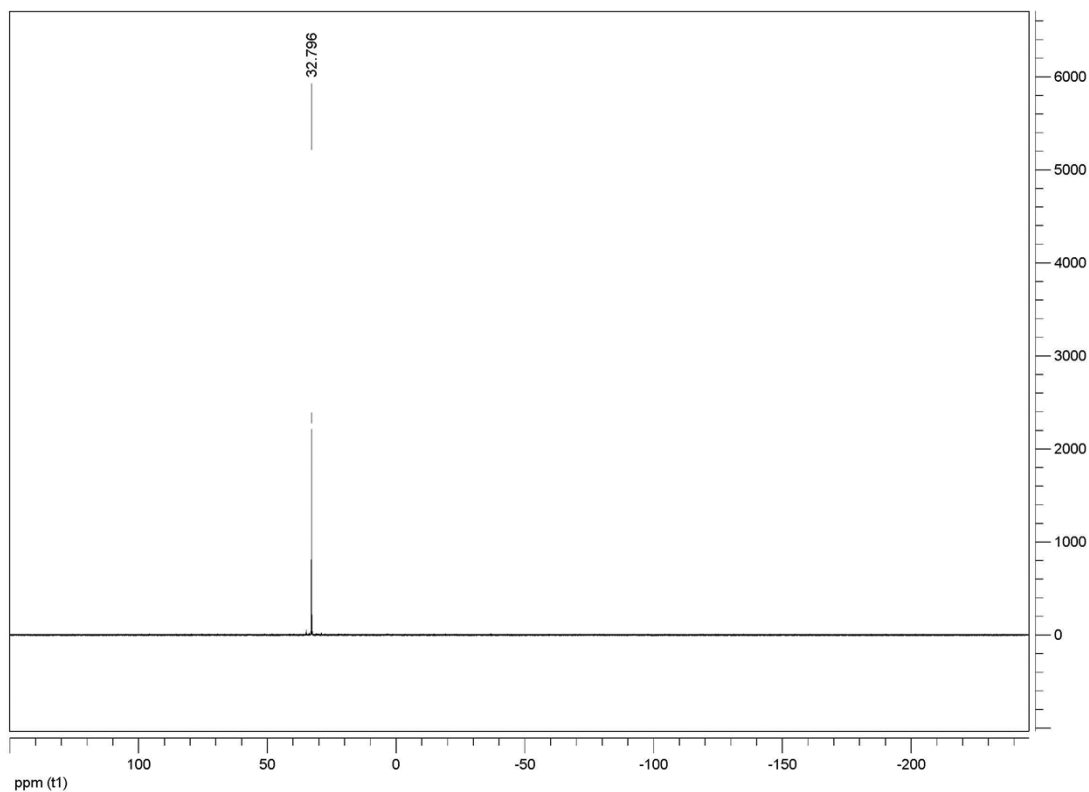

4 #49-50 RT: 0.45-0.47 AV: 2 NL: 2.41E5  
 T: FTMS {1,1} + p ESI Full ms [100.00-1000.00]

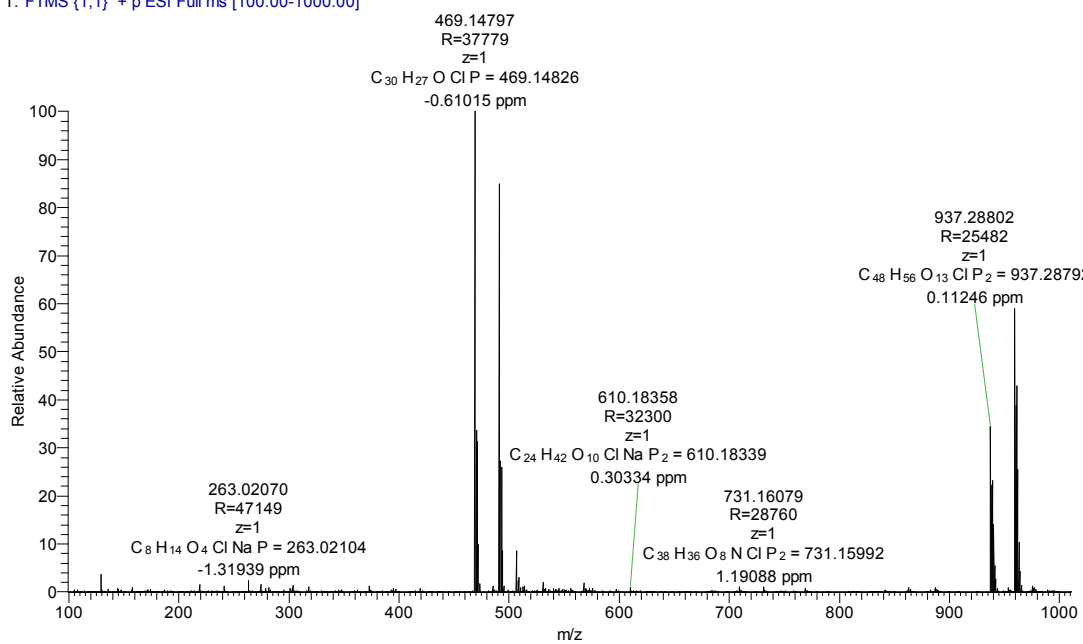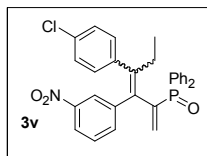



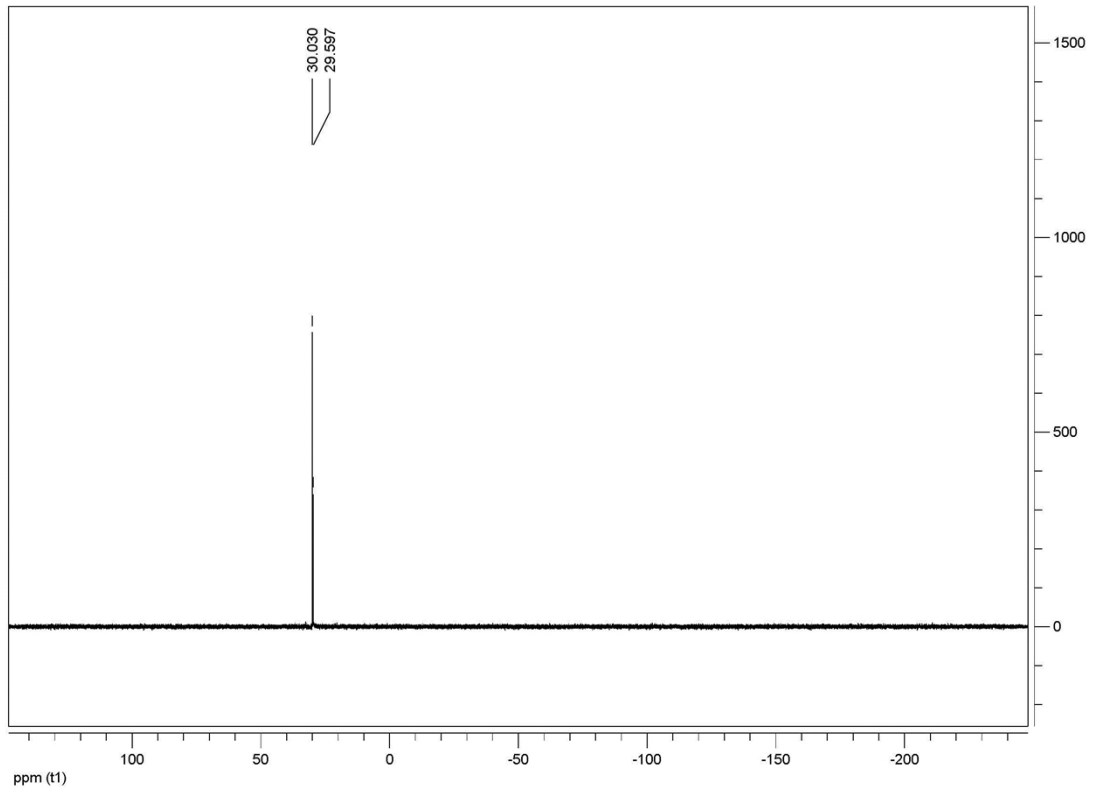

3 #43-44 RT: 0.42-0.43 AV: 2 NL: 1.35E5  
 T: FTMS {1,1} + p ESI Full ms [100.00-1000.00]

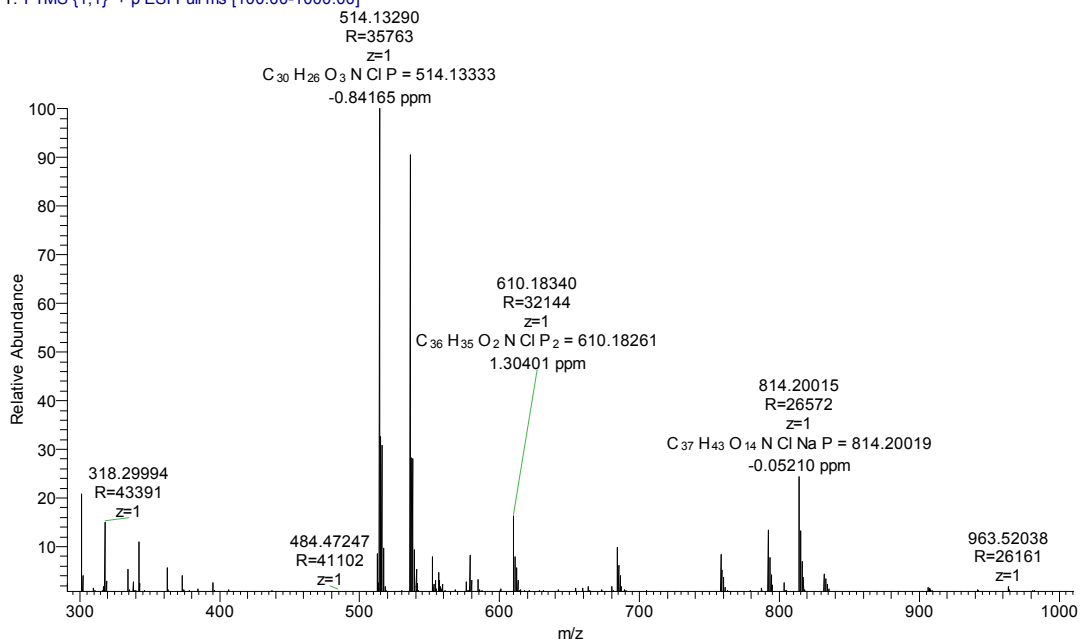

Supplement: c4ra12251h1.pdf [file c4ra12251h1.pdf]
